# Supplementary material for: Computational modeling and synthesis of Pyridine variants of Benzoyl-Phenoxy-Acetamide with high glioblastoma cytotoxicity and brain tumor penetration
Source: Research Square preprint supplement (doi:10.21203/rs.3.rs-2773503/v1), 2023-04-20
Supplement: Supplementary file 1 [file da1e57cbca6cd95db897d72d.pdf]

# Supplementary Materials

## Computational modeling and synthesis of Pyridine variants of Benzoyl-Phenoxy-Acetamide with high glioblastoma cytotoxicity and brain tumor penetration

Charles H. Ingraham IV<sup>a,c</sup>, Joanna Stalinska<sup>c,d</sup>, Sean C. Carson<sup>a</sup>, Susan B. Colley<sup>c1</sup>, Monika Rak<sup>c,d</sup>, Adam Lassak<sup>c</sup>, Krzysztof Reiss<sup>c,e\*</sup>, and Branko S. Jursic<sup>a,b\*</sup>

<sup>a</sup>Department of Chemistry, University of New Orleans, New Orleans, LA 70148, United States;

<sup>b</sup>Stepharm llc., PO Box 24220, New Orleans, LA 70184;

<sup>c</sup>Neurological Cancer Research, <sup>c1</sup>Stanley S. Scott Cancer Center, Department of Interdisciplinary Oncology, LSU Health Sciences Center, New Orleans, LA 70112;

<sup>d</sup>Department of Cell Biology, Faculty of Biochemistry, Biophysics and Biotechnology, Jagiellonian University, Cracow Poland;

<sup>e</sup>WayPath Pharma, New Orleans BioInnovation Center (NOBIC), 1441 Canal Str., New Orleans, LA 70112.

\*Corresponding authors

### Content table:

1. Nuclear Magnetic Resonance data of Pyridine-BPA variants:  
<sup>1</sup>H-NMR, <sup>13</sup>C-NMRs (HR48-HR90). (pages 1 – 149)
2. MarvinSketch (Product version 22.21) data: comparison between selected chemotherapy drugs for CNS tumors and Pyridine-BPA variants (HR48-HR90). (pages 150 – 243)
3. Density Functional Theory (DFT) with  $\omega$ B97X-D/6-31G\* computed molecular properties of Pyridine-BPA variants (HR48-HR90). (pages 244 – 247)
4. Detection of our prototype drug candidate, PP1, in mouse tissues following intraperitoneal delivery (page 248).

1) Nuclear Magnetic Resonance data of Pyridine-BPA variants:  $^1\text{H-NMR}$ ,  $^{13}\text{C-NMRs}$ .

$^1\text{H-NMR}$  (DMSO- $d_6$ ) Varian Mercury 400 Plus

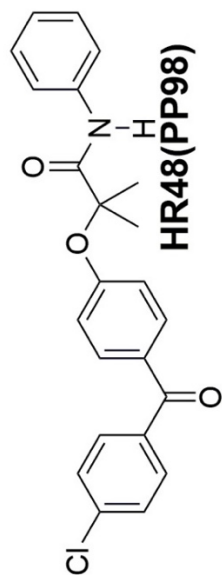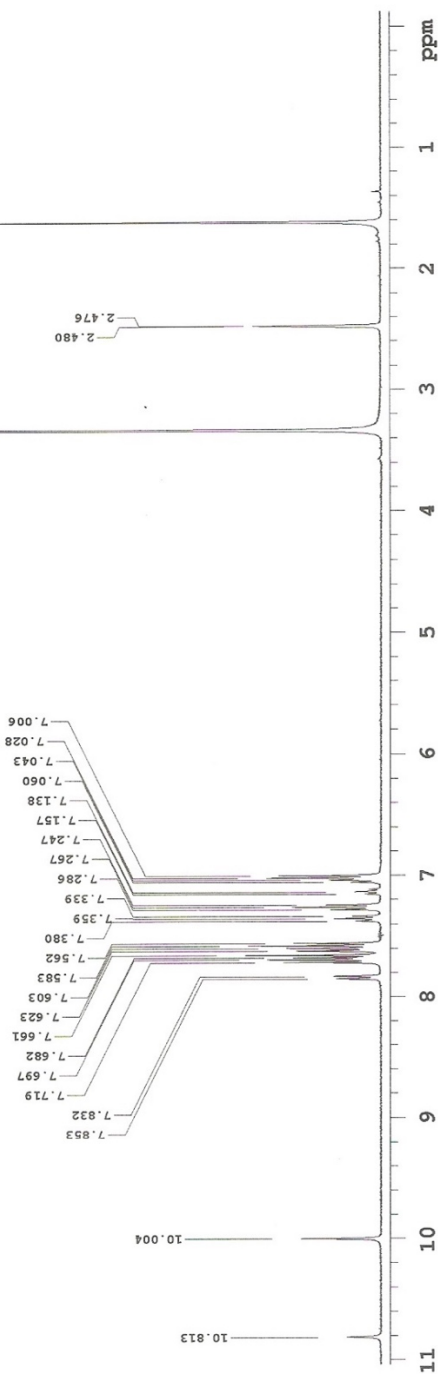

# <sup>13</sup>C-NMR (DMSO-d<sub>6</sub>) Varian Mercury 400 Plus

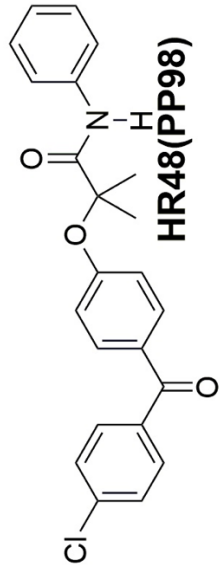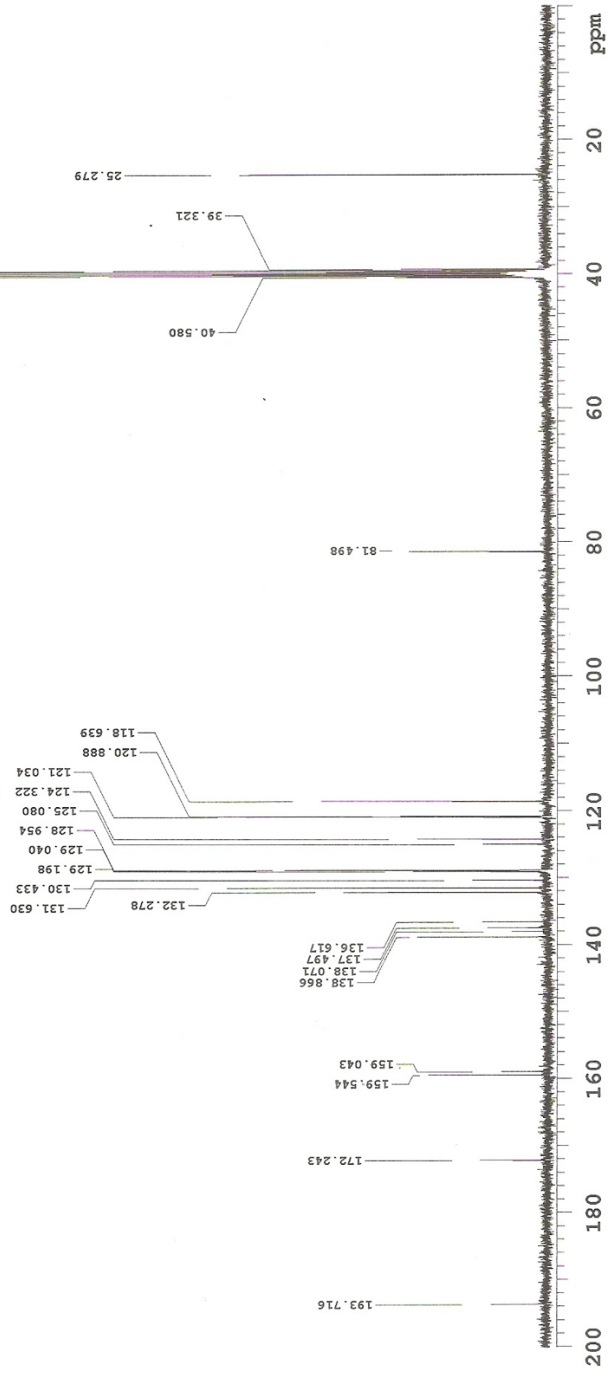

# <sup>1</sup>H-NMR (CDCl<sub>3</sub>) Varian Mercury 400 Plus

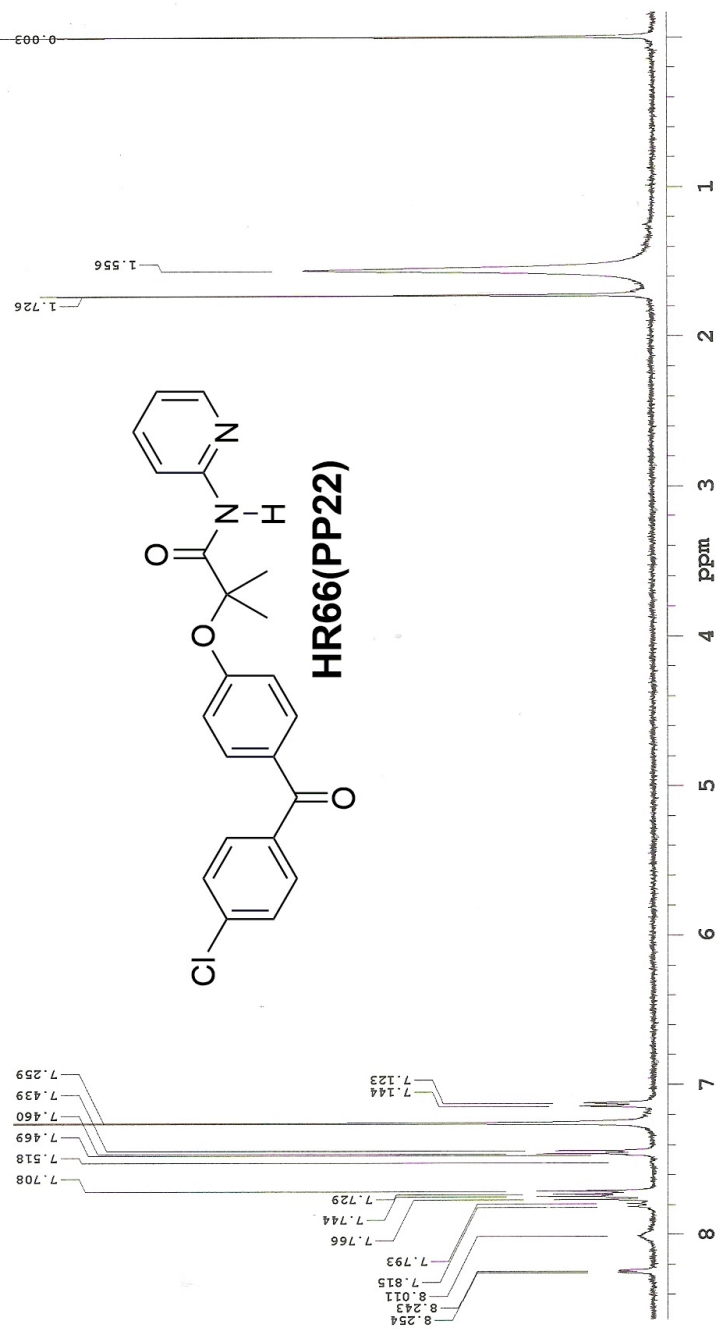

# $^1\text{H-NMR}$ ( $\text{CDCl}_3$ ) Varian Mercury 400 Plus

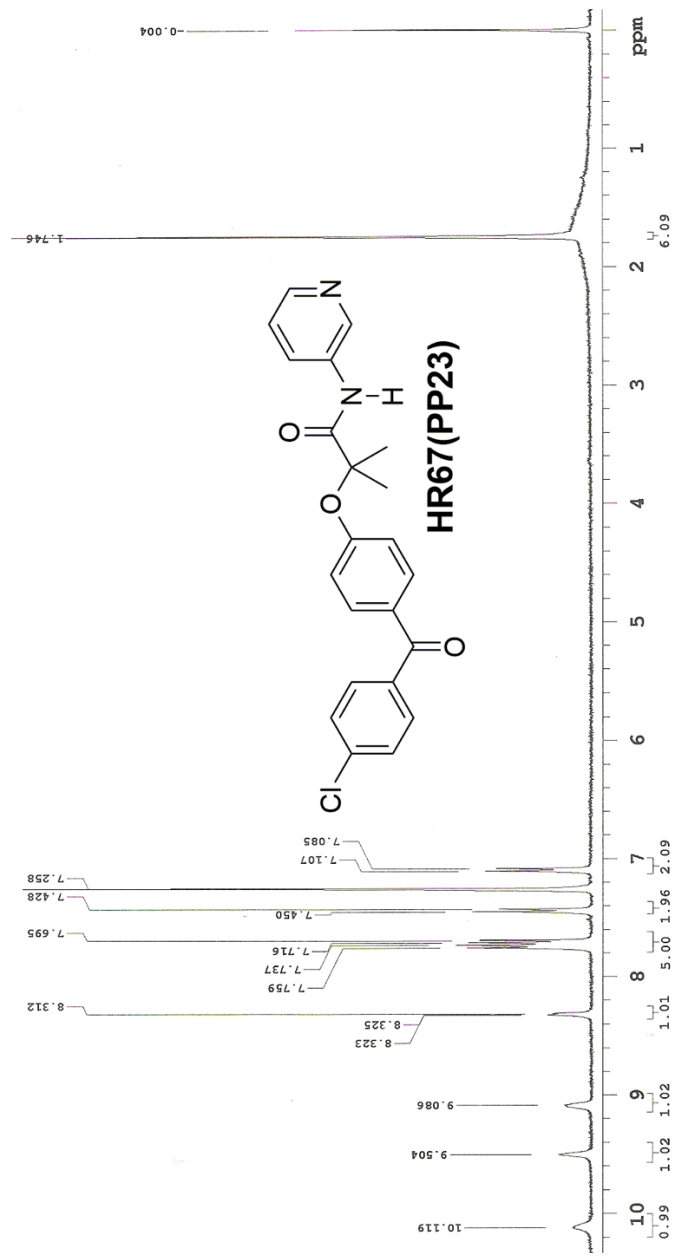

# $^1\text{H-NMR}$ (DMSO- $\text{d}_6$ ) Varian Mercury 400 Plus

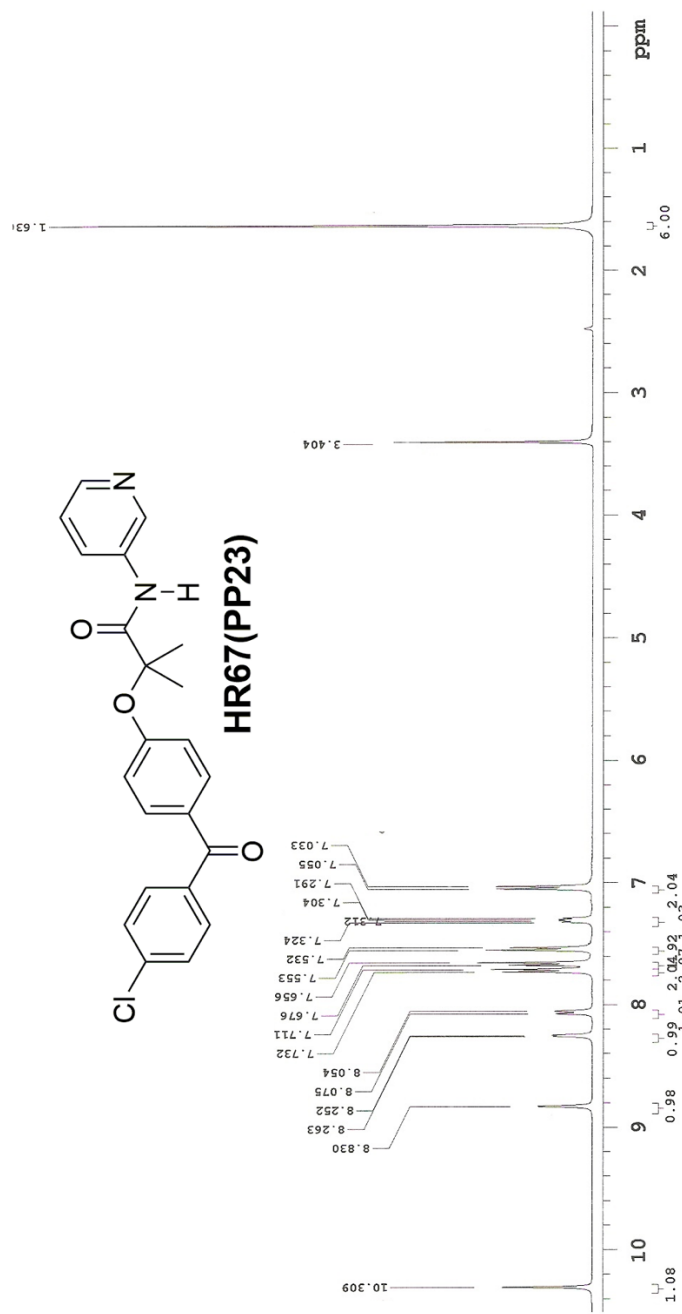

# <sup>1</sup>H-NMR (DMSO-d<sub>6</sub>) Varian Mercury 400 Plus

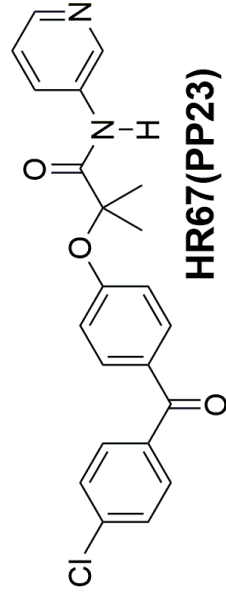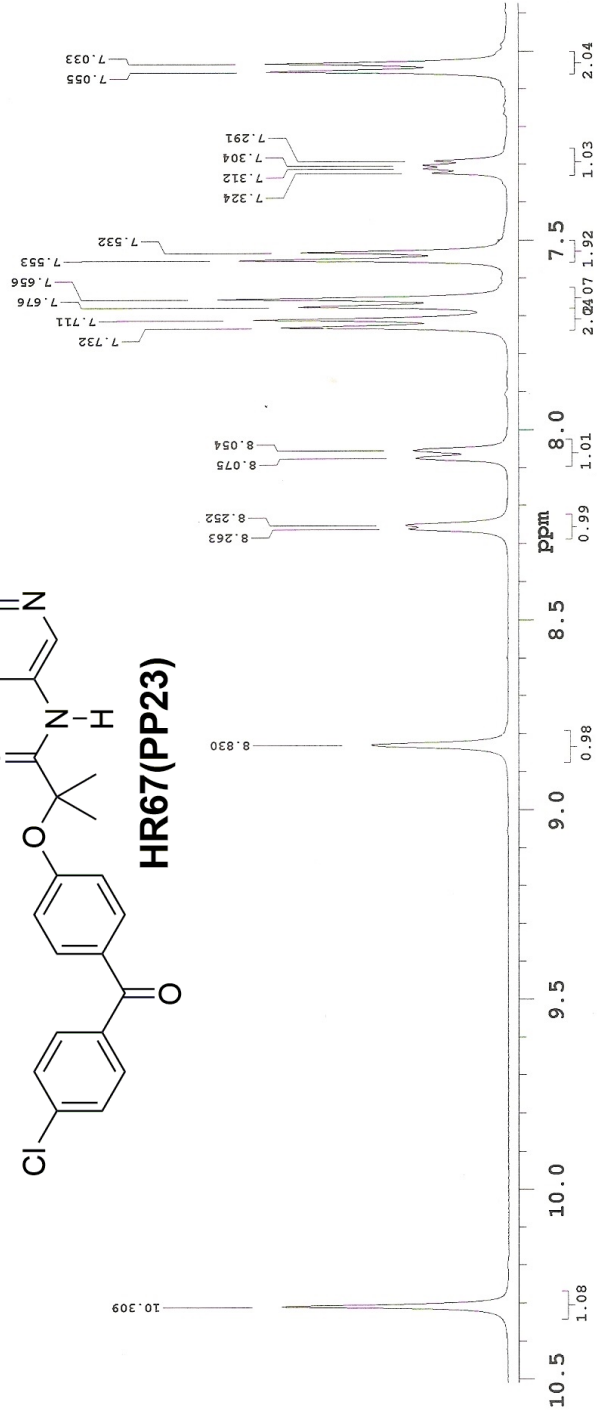

# <sup>13</sup>C-NMR (DMSO-d<sub>6</sub>) Varian Mercury 400 Plus

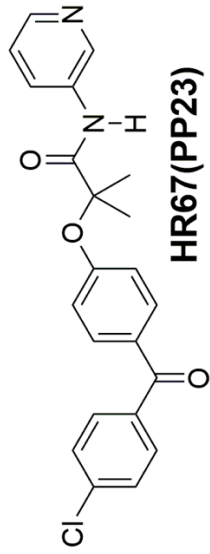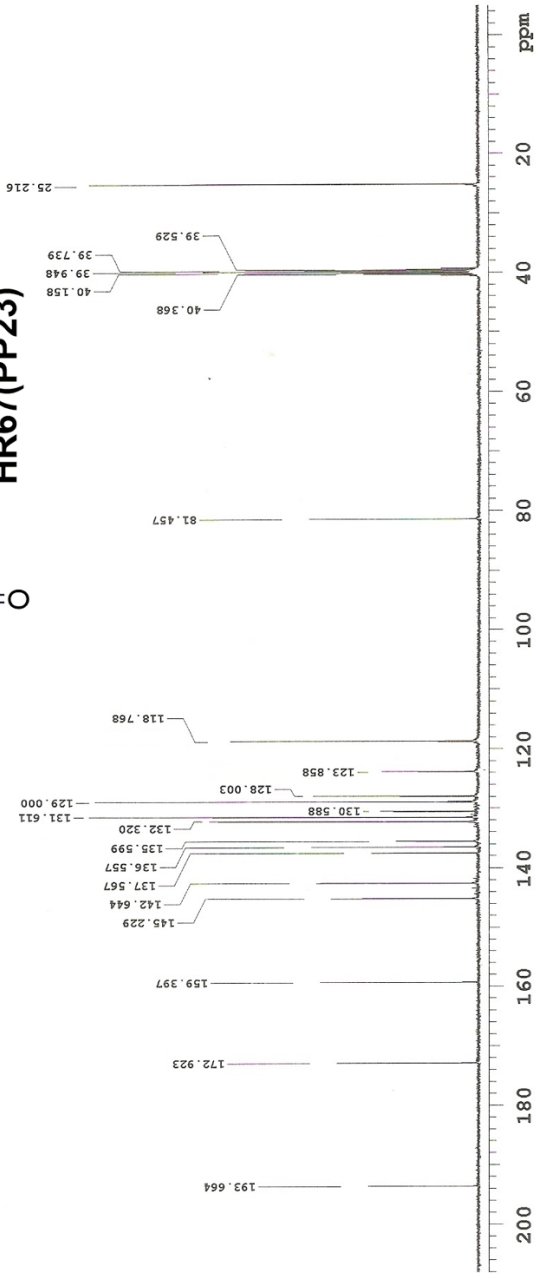

# <sup>1</sup>H-NMR (CDCl<sub>3</sub>) Varian Mercury 300

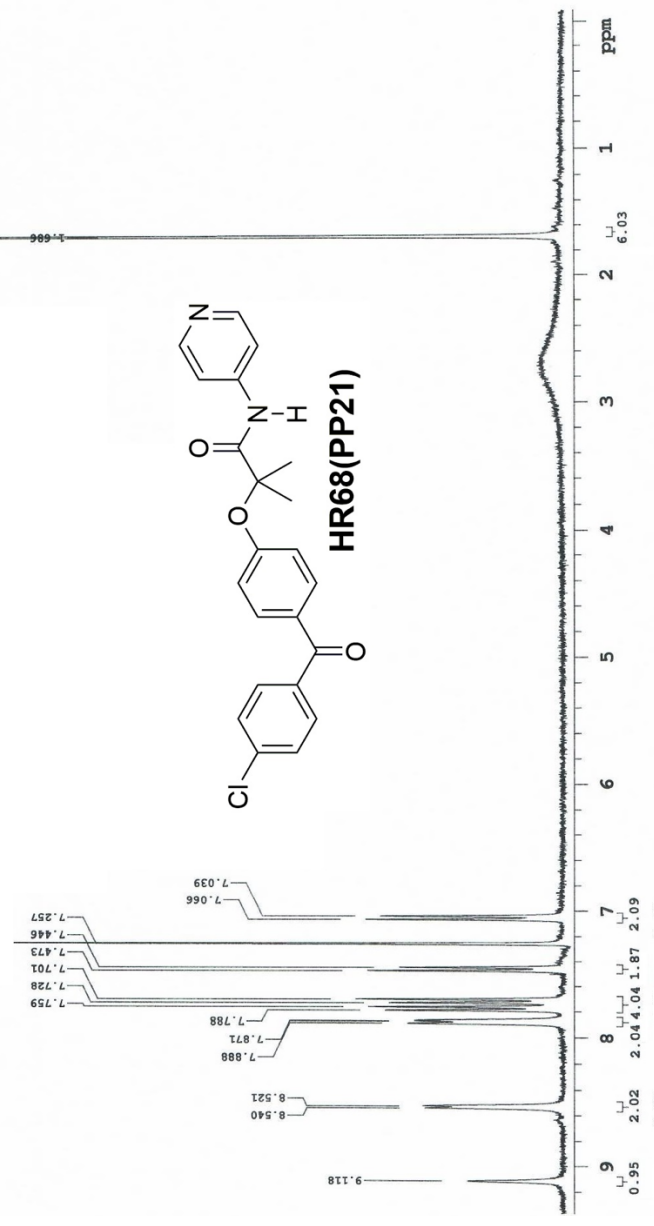

# $^1\text{H-NMR}$ ( $\text{CDCl}_3$ ) Varian Mercury 300

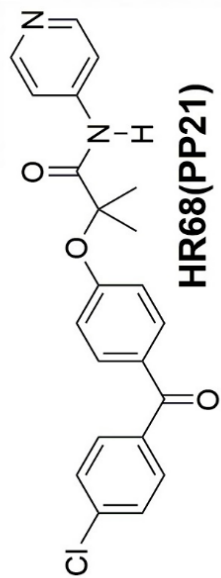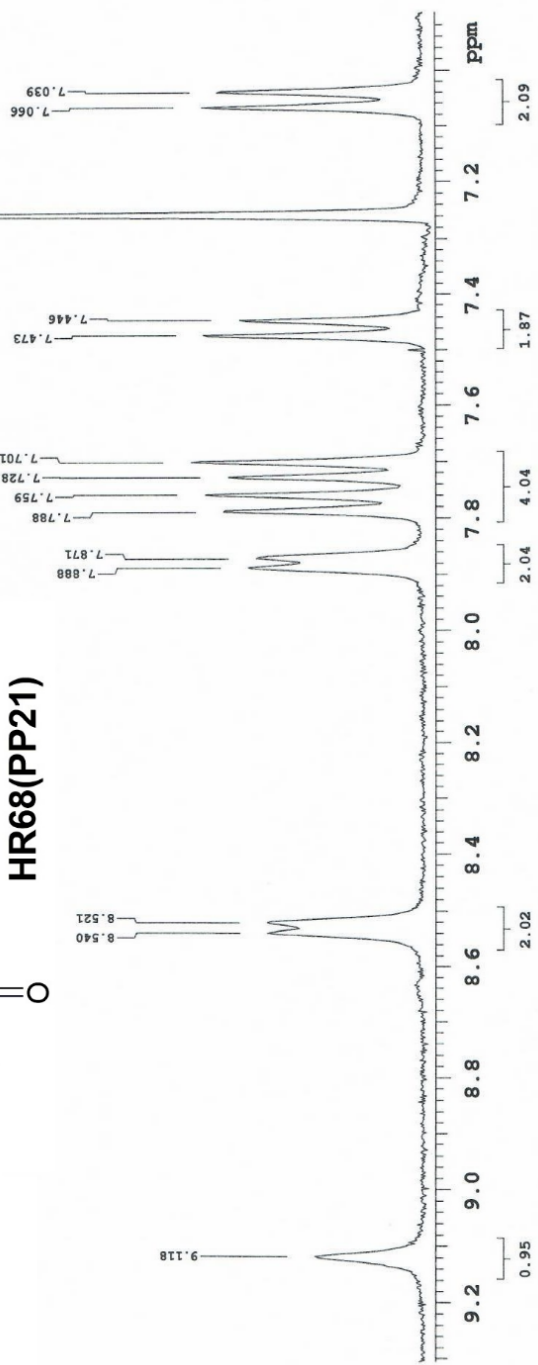

# $^1\text{H-NMR}$ (DMSO- $d_6$ ) Varian Mercury 400 Plus

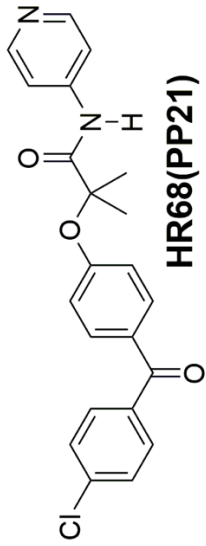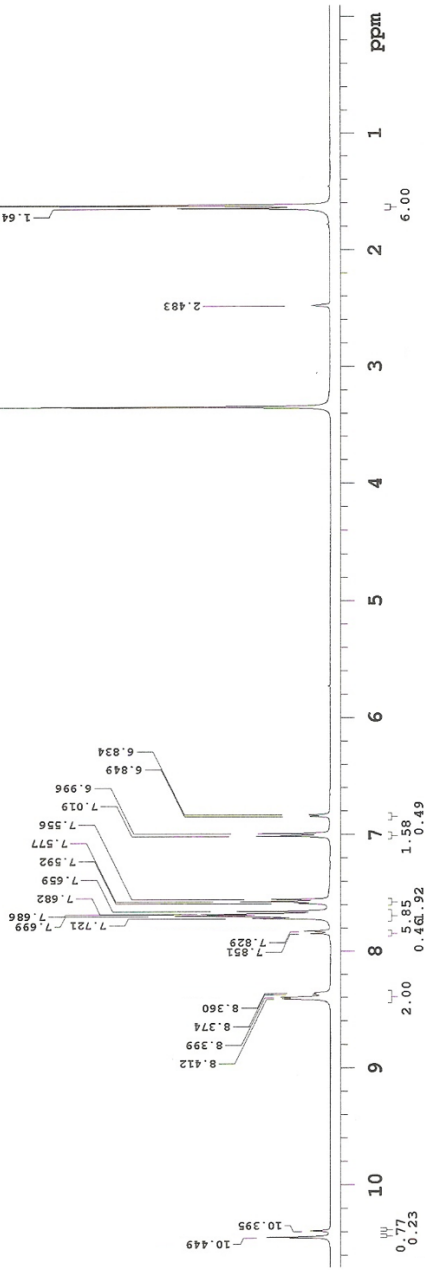

# <sup>1</sup>H-NMR (DMSO-d<sub>6</sub>) Varian Mercury 400 Plus

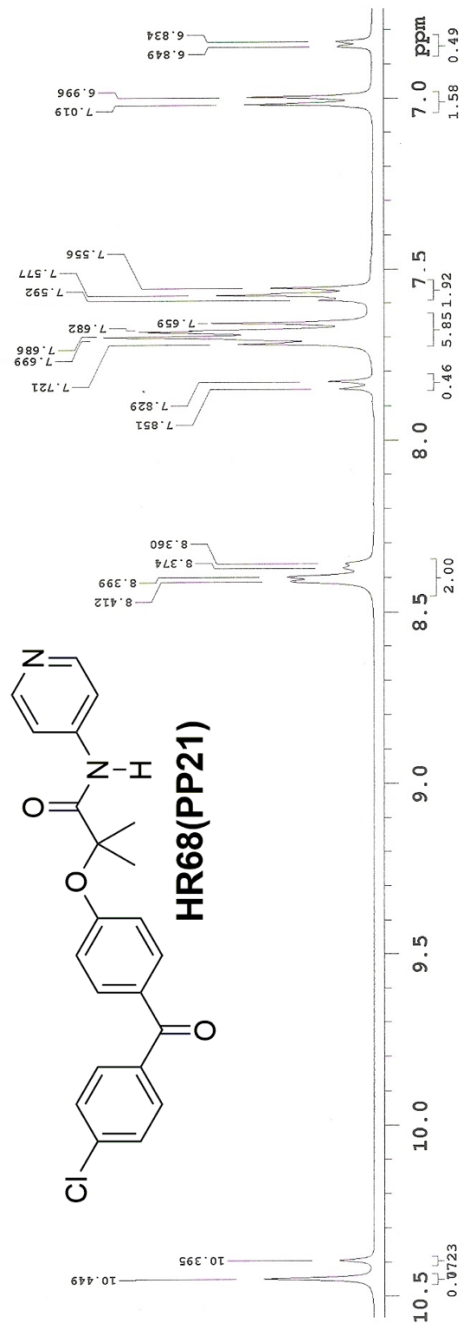

# <sup>13</sup>C-NMR (DMSO-d<sub>6</sub>) Varian Mercury 400 Plus

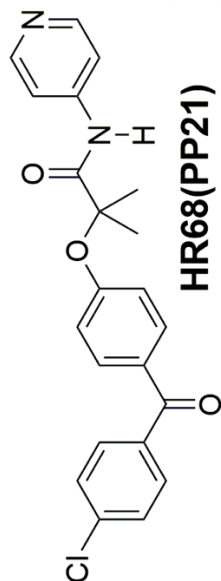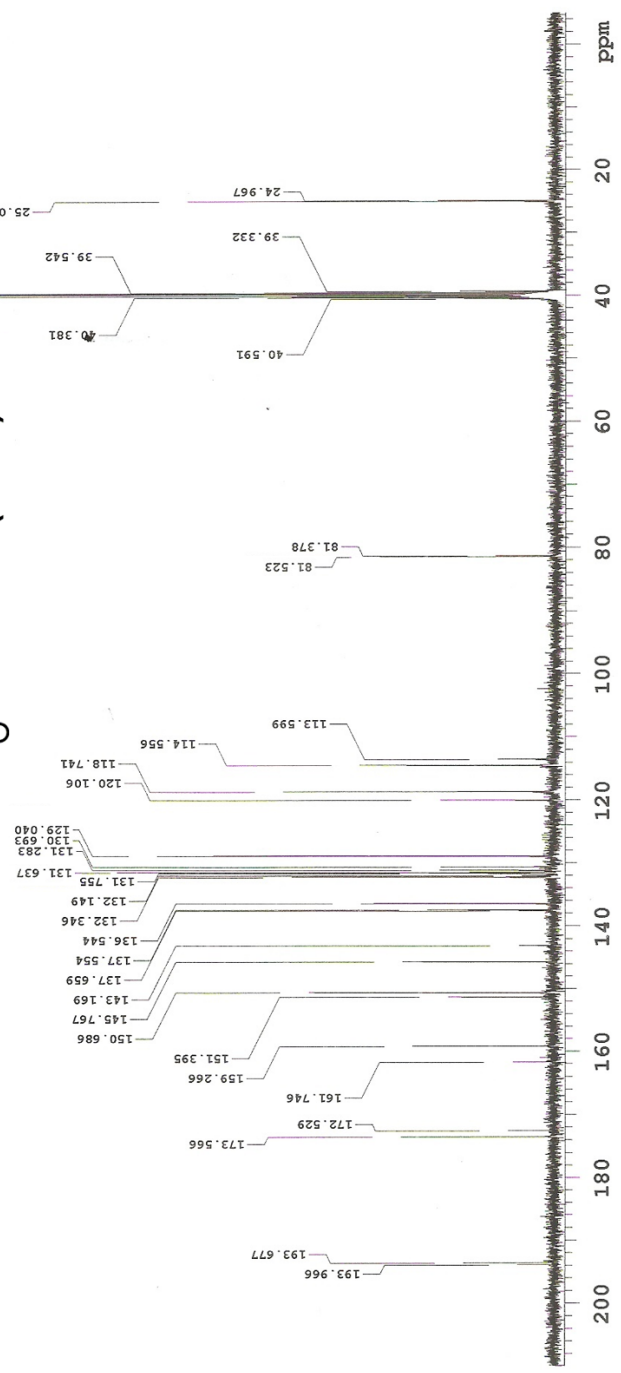

# $^1\text{H-NMR}$ ( $\text{CDCl}_3$ ) Varian Mercury 300

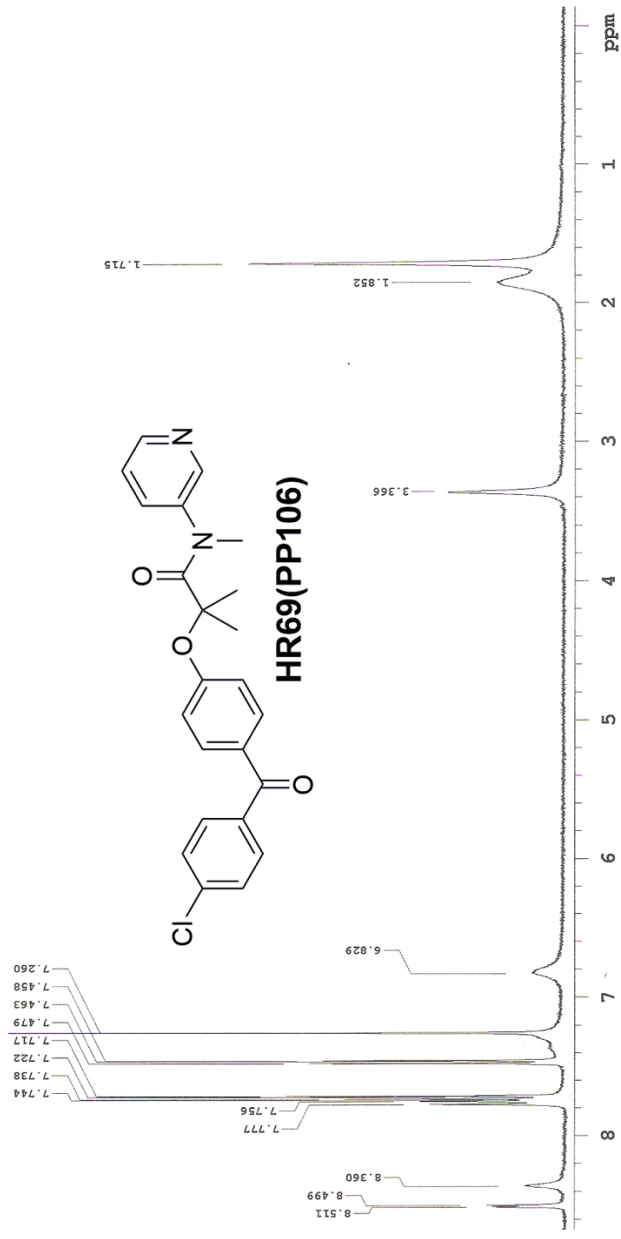

# <sup>1</sup>H-NMR (CDCl<sub>3</sub>) Varian Mercury 400 Plus

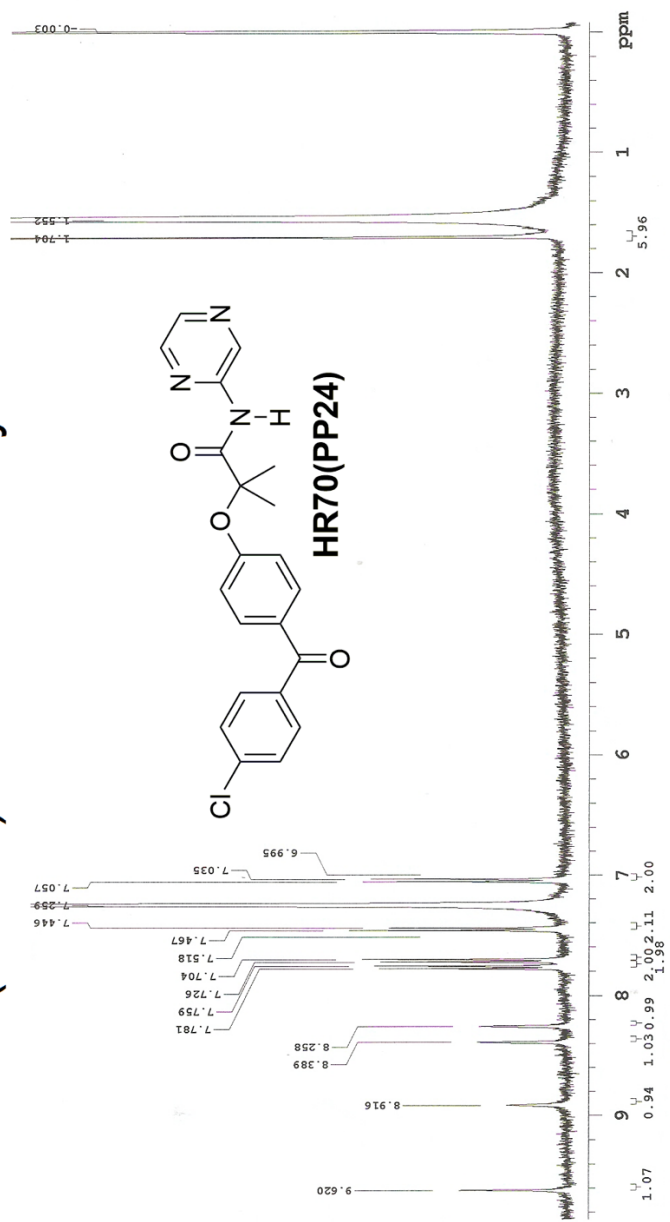

# <sup>1</sup>H-NMR (DMSO-d<sub>6</sub>) Varian Mercury 400 Plus

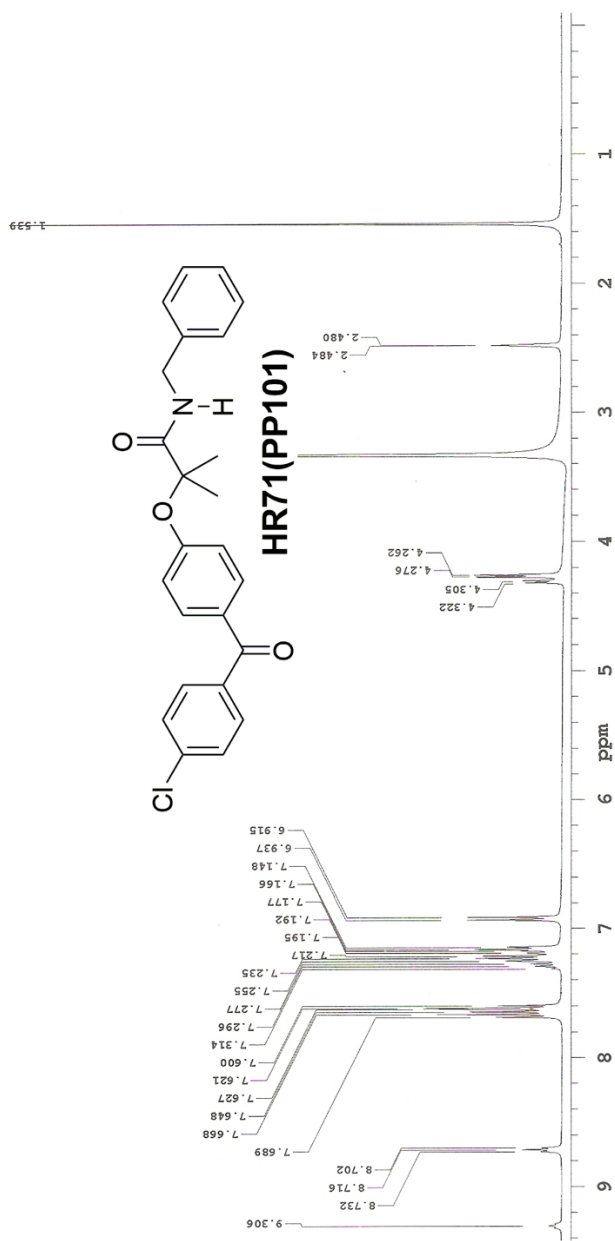

# <sup>13</sup>C-NMR (DMSO-d<sub>6</sub>) Varian Mercury 400 Plus

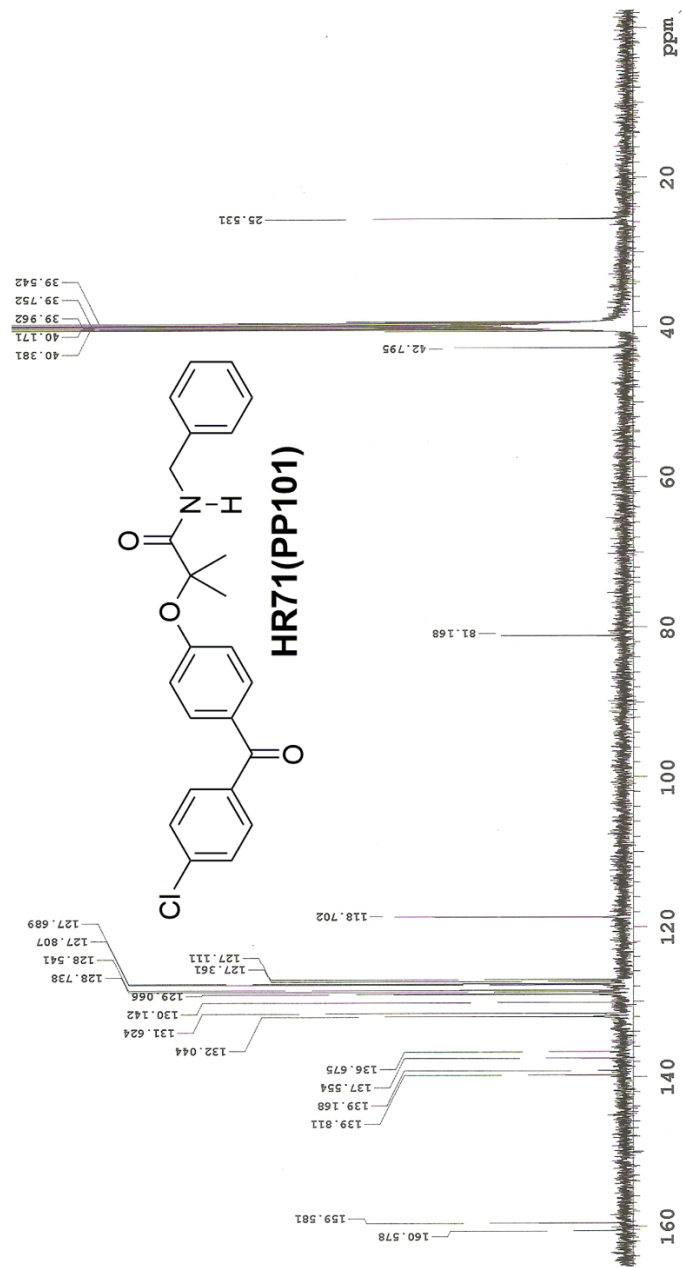

# <sup>1</sup>H-NMR (DMSO-d<sub>6</sub>) Varian Mercury 400 Plus

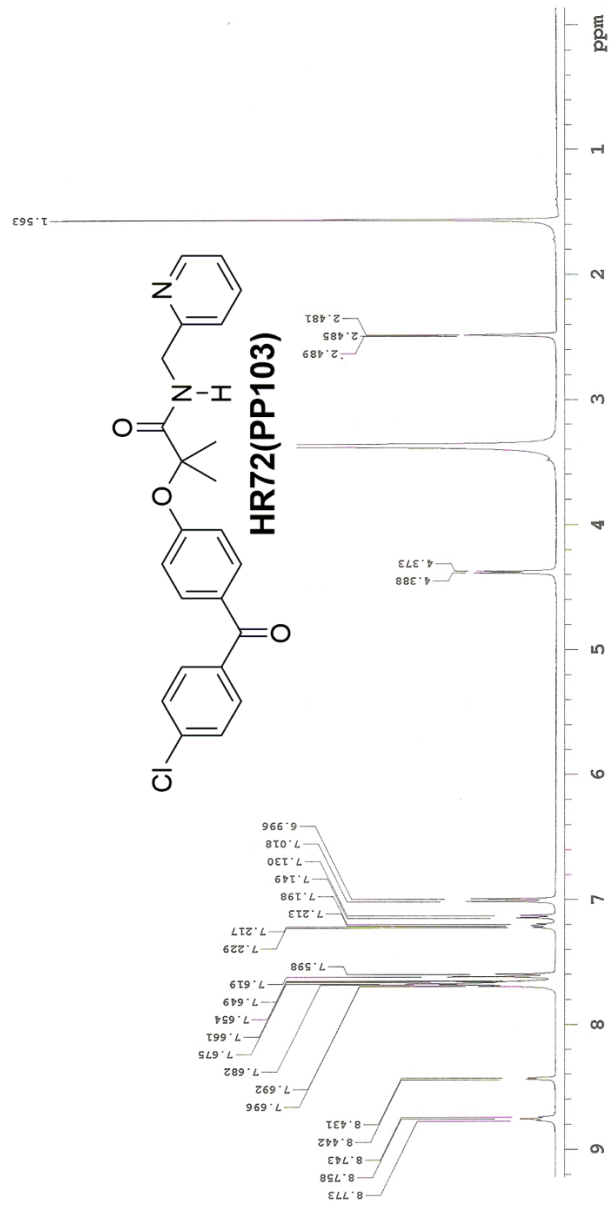

# <sup>13</sup>C-NMR (DMSO-d<sub>6</sub>) Varian Mercury 400 Plus

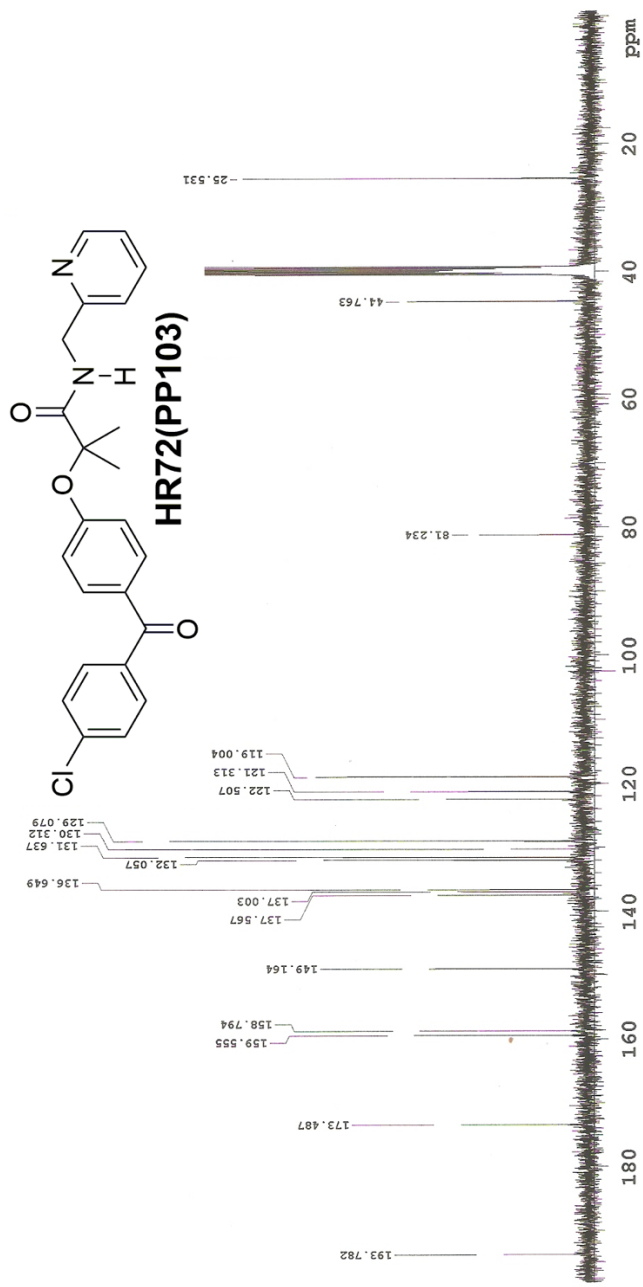

# <sup>1</sup>H-NMR (DMSO-d<sub>6</sub>) Varian Mercury 400 Plus

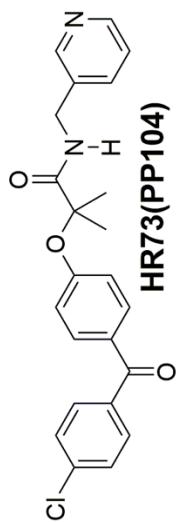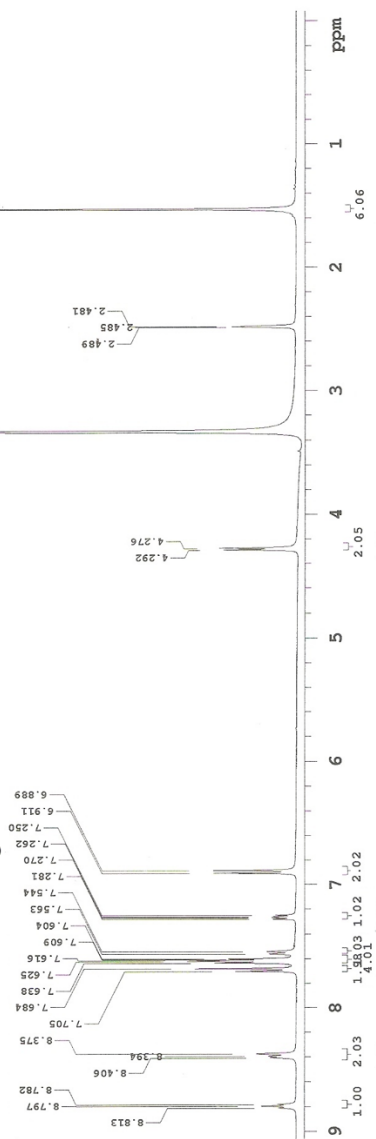



# <sup>1</sup>H-NMR (DMSO-d<sub>6</sub>) Varian Mercury 400 Plus

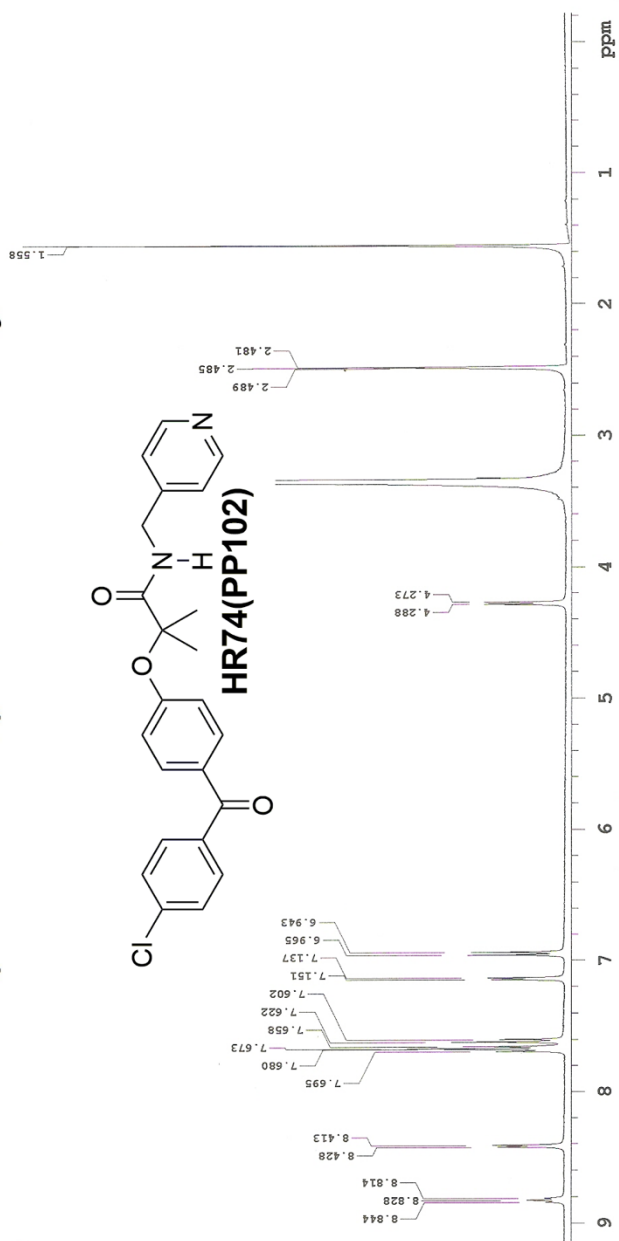

# <sup>13</sup>C-NMR (DMSO-d<sub>6</sub>) Varian Mercury 400 Plus

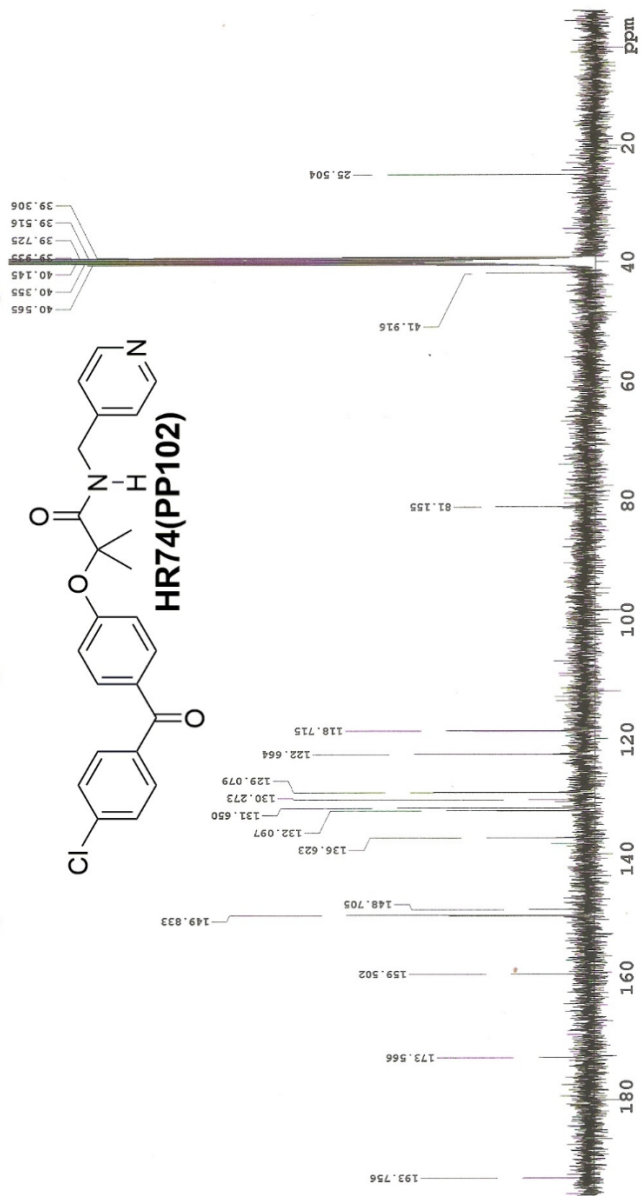

# <sup>1</sup>H-NMR (CDCl<sub>3</sub>) Varian Mercury 400 Plus

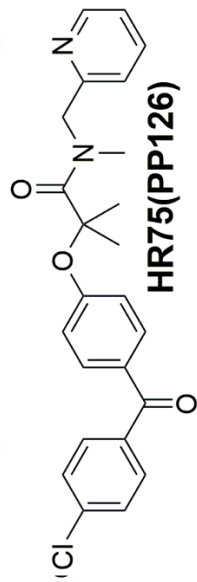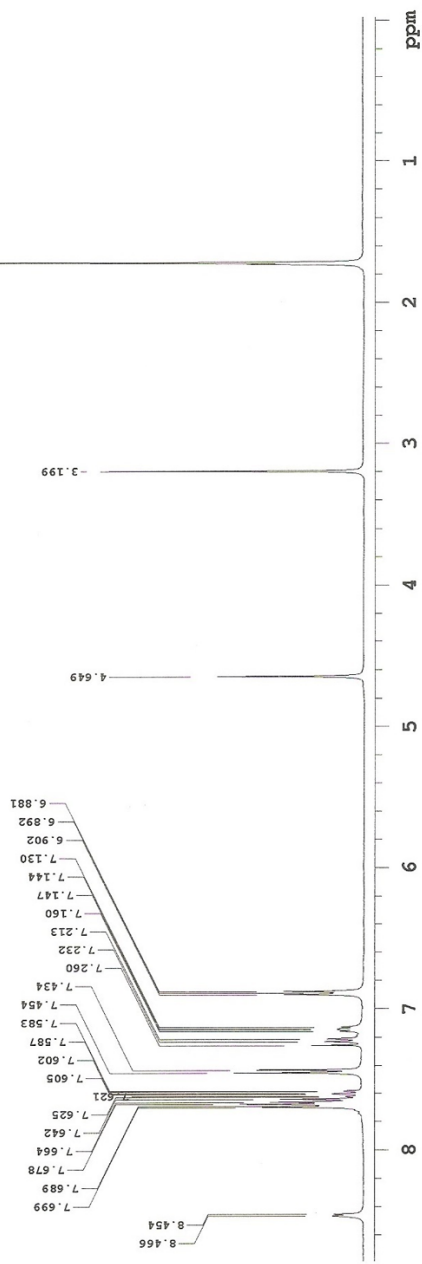

# <sup>1</sup>H-NMR (CDCl<sub>3</sub>) Varian Mercury 400 Plus

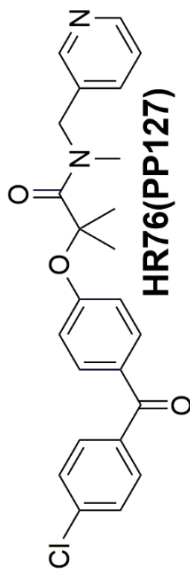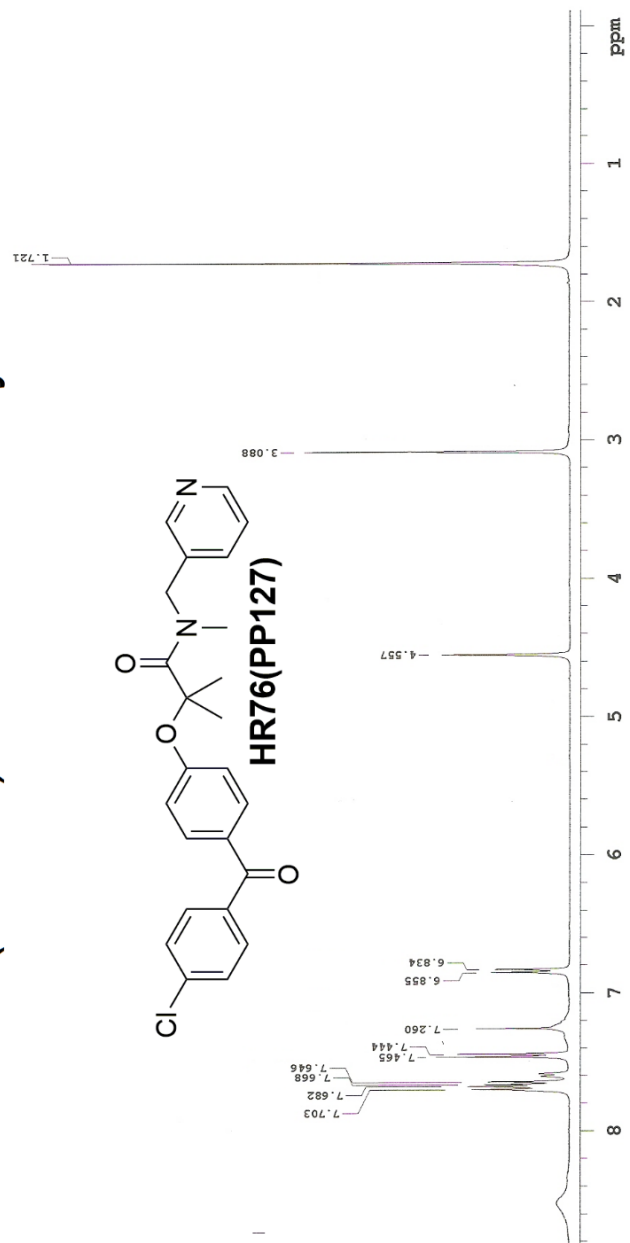

# $^1\text{H-NMR}$ ( $\text{CDCl}_3$ ) Varian Mercury 400 Plus

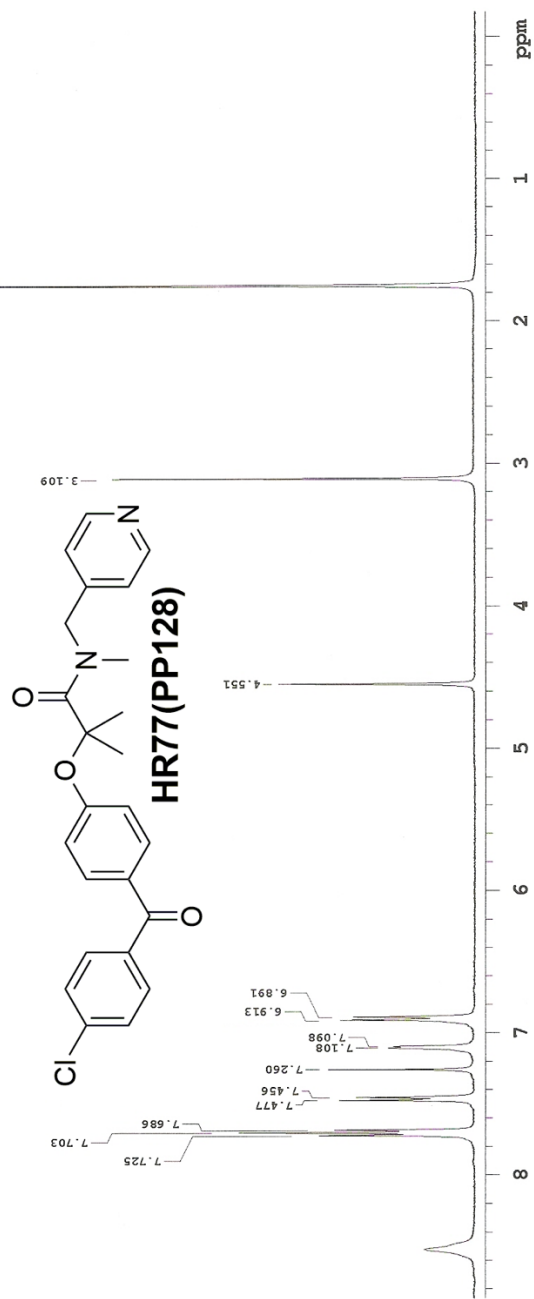

# <sup>1</sup>H-NMR (DMSO-d<sub>6</sub>) Varian Mercury 400 Plus

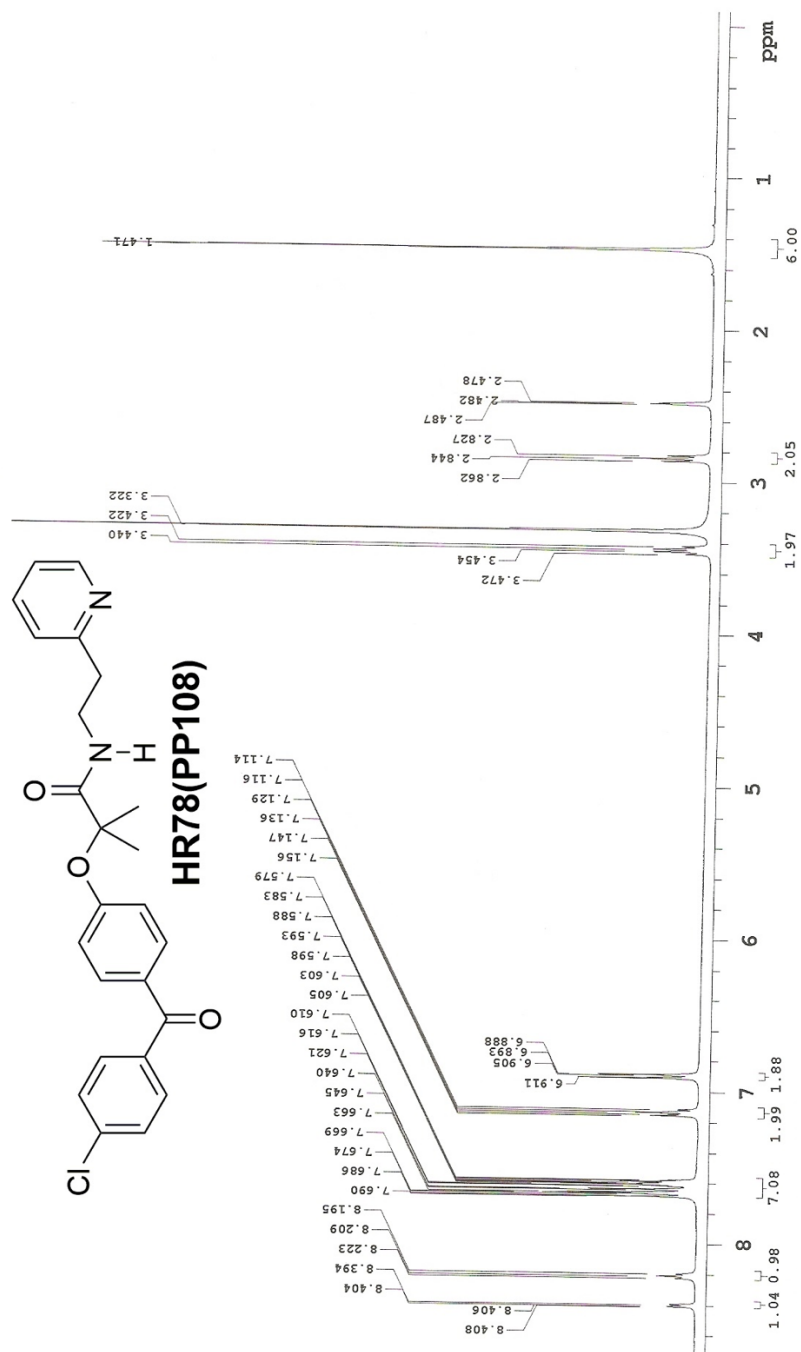

# <sup>13</sup>C-NMR (DMSO-d<sub>6</sub>) Varian Mercury 400 Plus

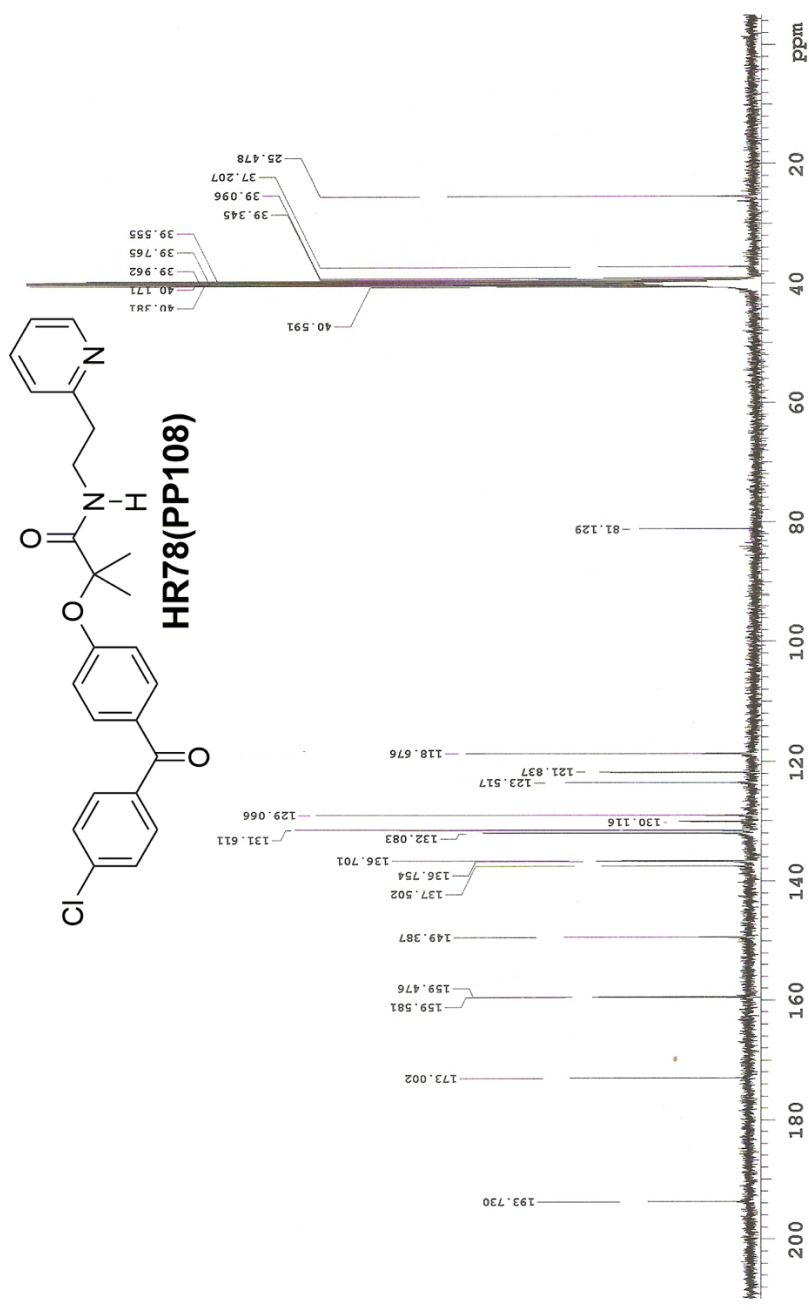

# <sup>1</sup>H-NMR (DMSO-d<sub>6</sub>) Varian Mercury 400 Plus

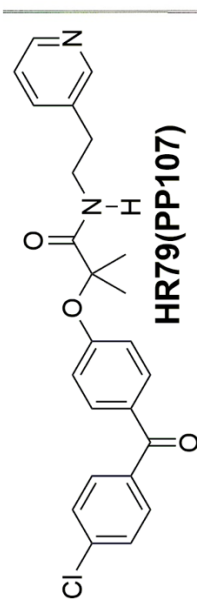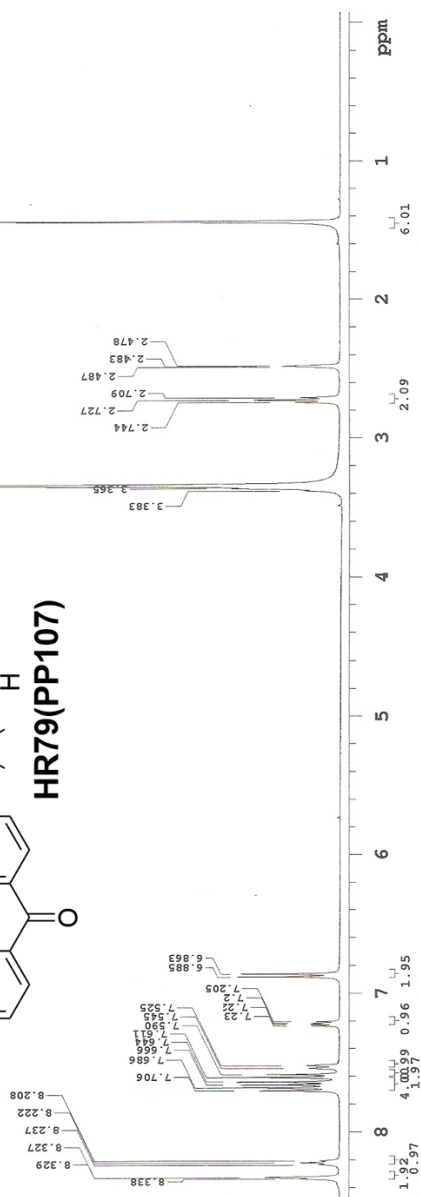

# $^1\text{H-NMR}$ (DMSO- $d_6$ ) Varian Mercury 400 Plus

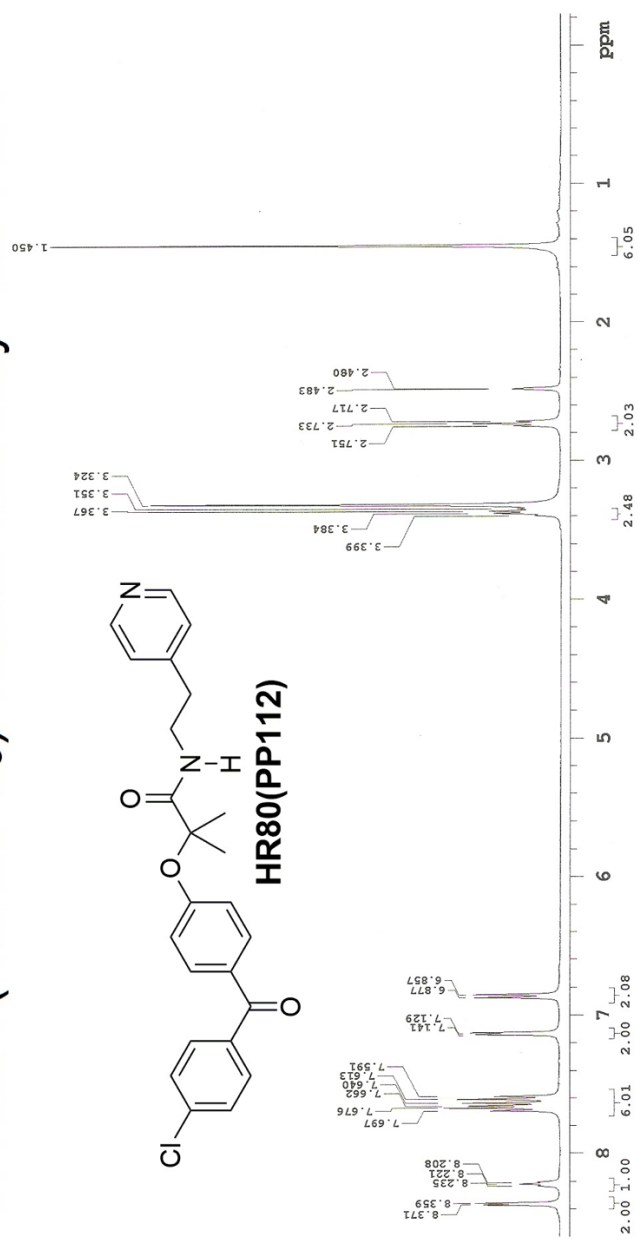

# <sup>13</sup>C-NMR (DMSO-d<sub>6</sub>) Varian Mercury 400 Plus

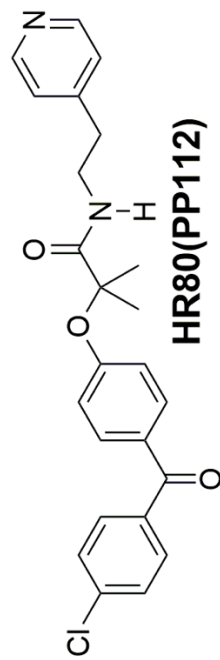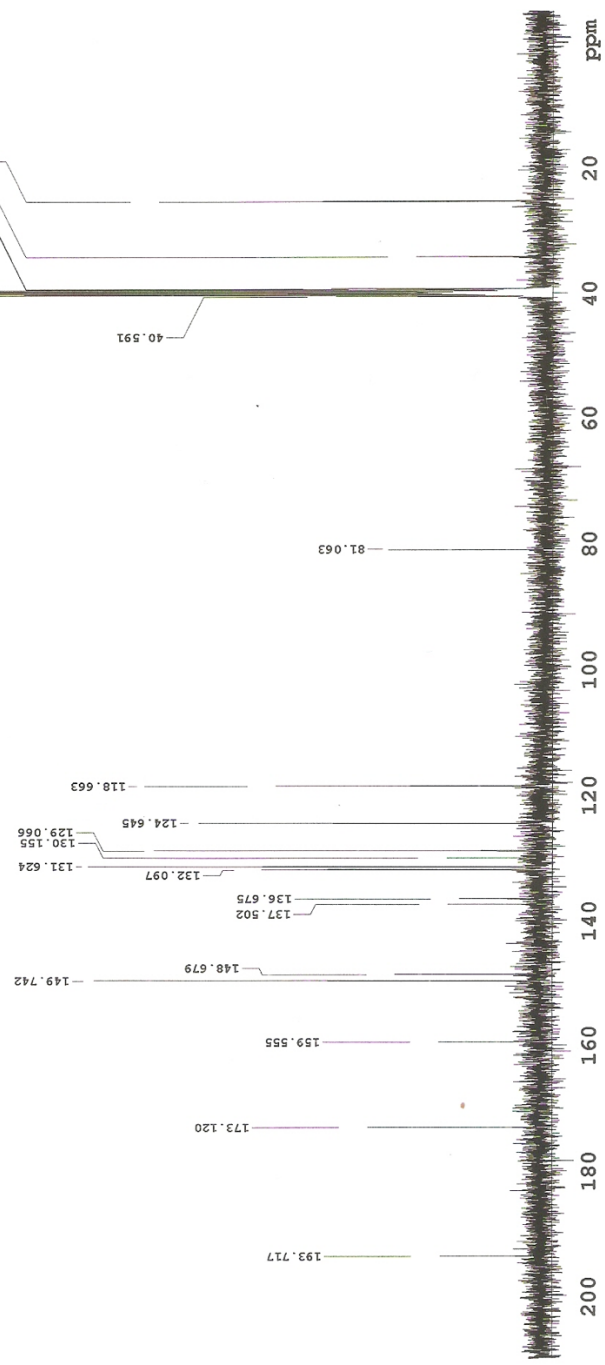

# $^1\text{H-NMR}$ (DMSO- $\text{d}_6$ ) Varian Mercury 400 Plus

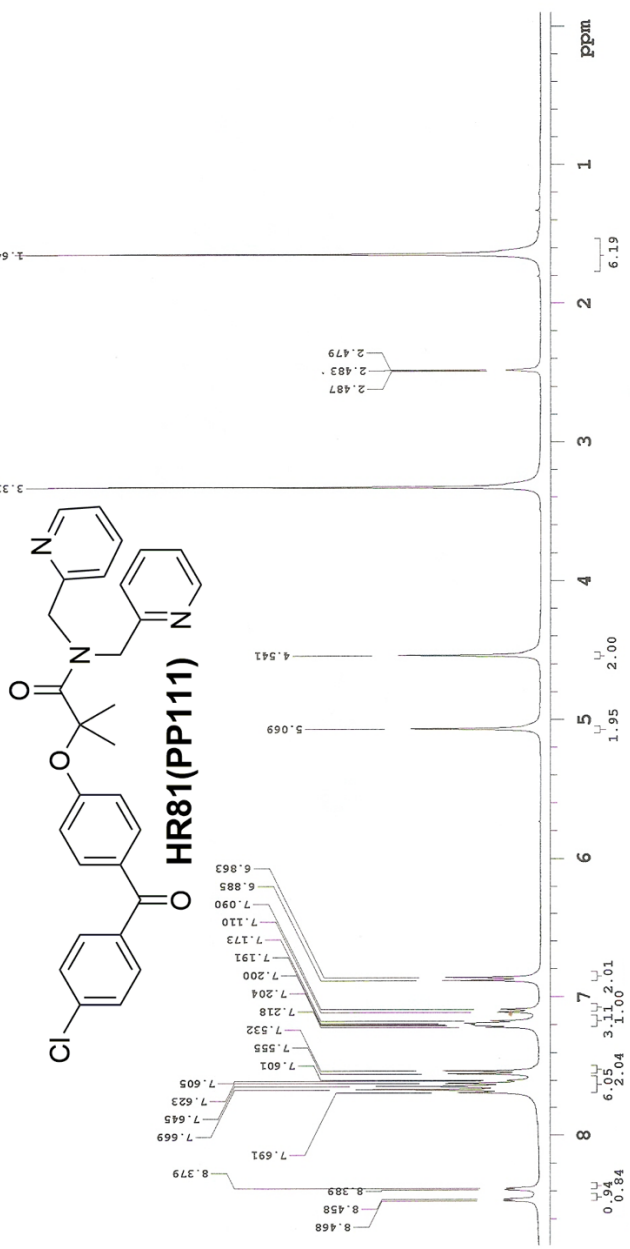

# <sup>13</sup>C-NMR (DMSO-d<sub>6</sub>) Varian Mercury 400 Plus

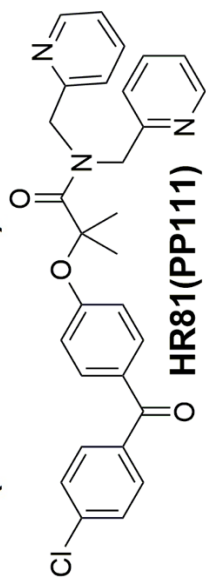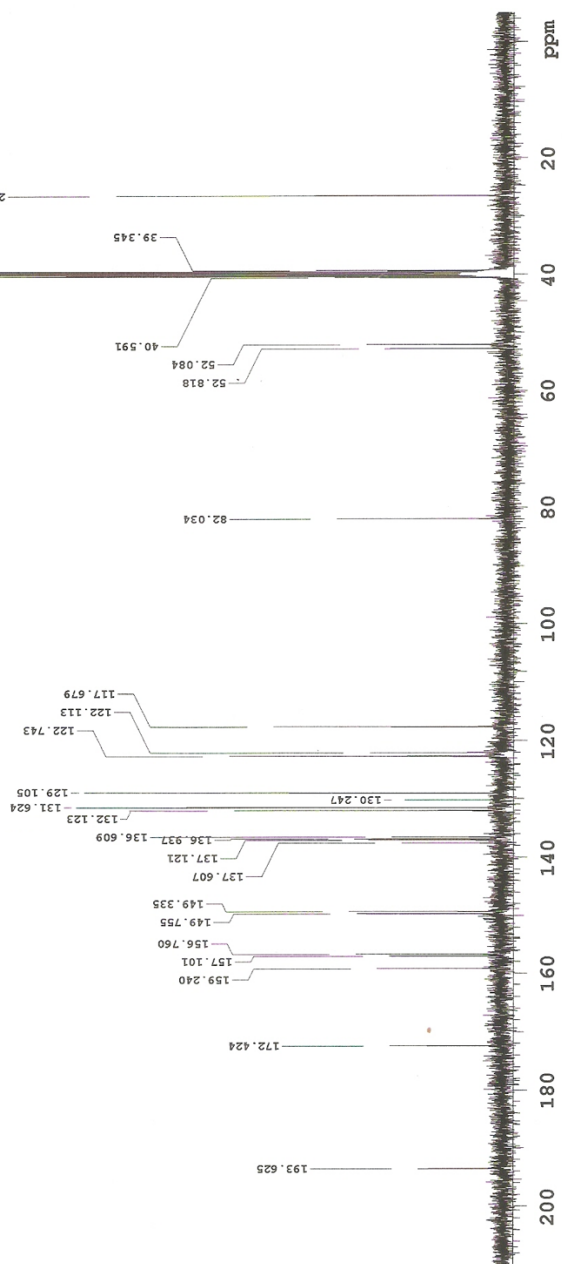

# <sup>1</sup>H-NMR (CDCl<sub>3</sub>) Varian Mercury 400 Plus

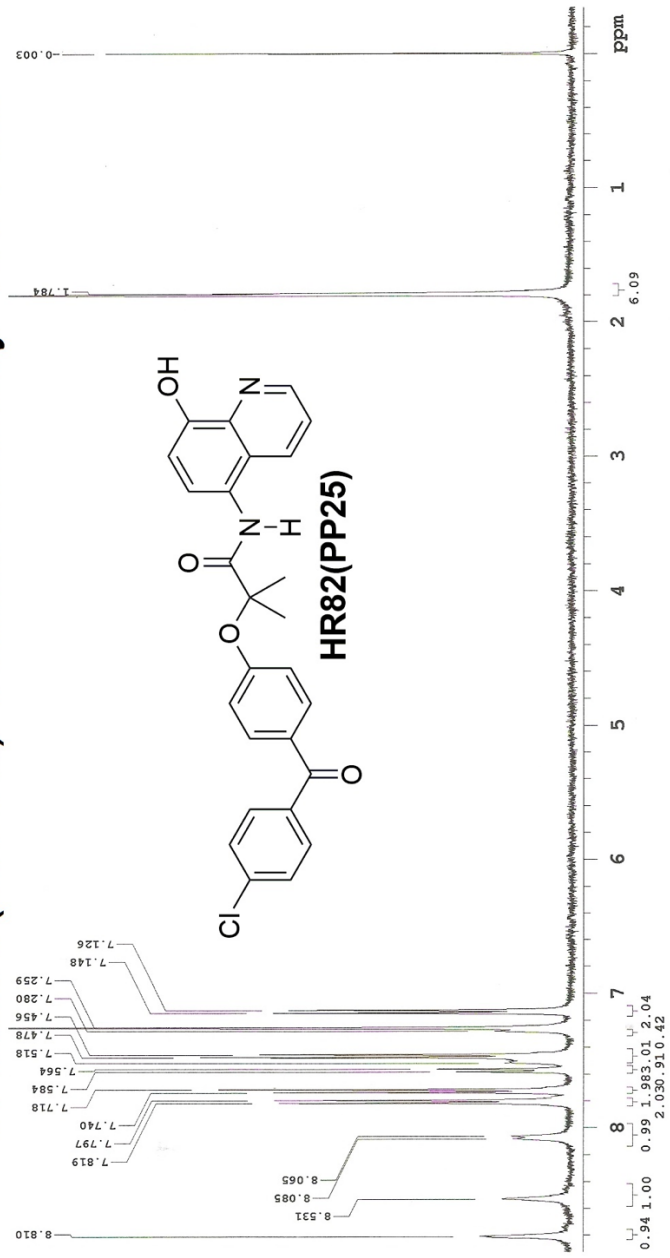

# <sup>1</sup>H-NMR (DMSO-d<sub>6</sub>) Varian Mercury 300

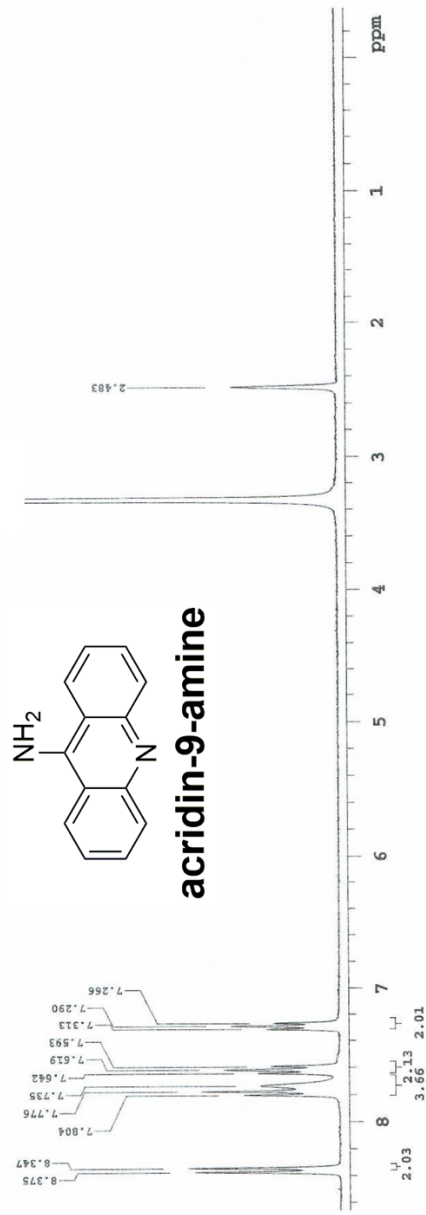

# $^1\text{H-NMR}$ ( $\text{DMSO-d}_6$ ) Varian Mercury 300

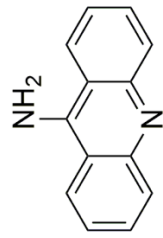

**acridin-9-amine**

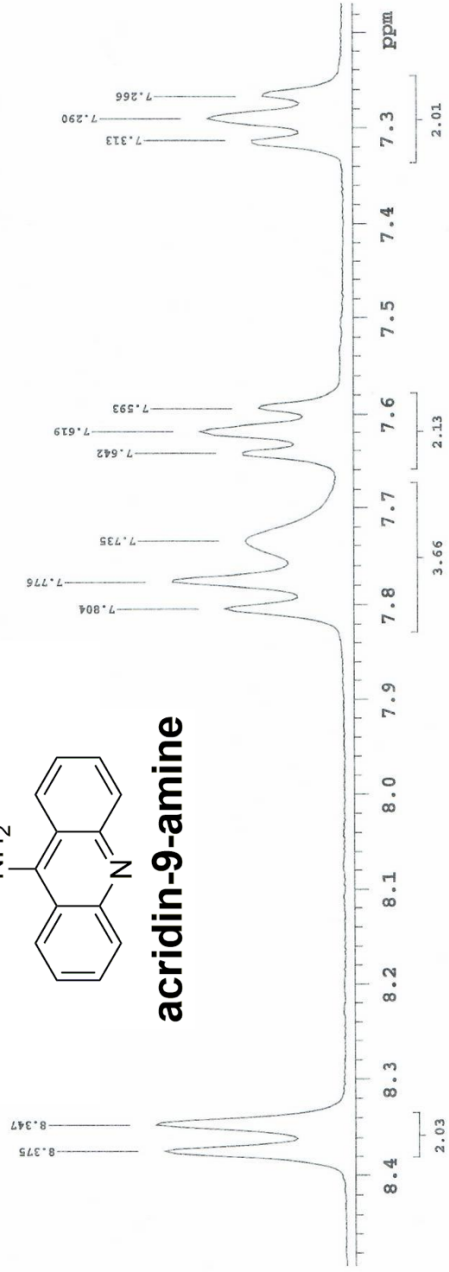

# <sup>1</sup>H-NMR (DMSO-d<sub>6</sub>) Varian Mercury 300

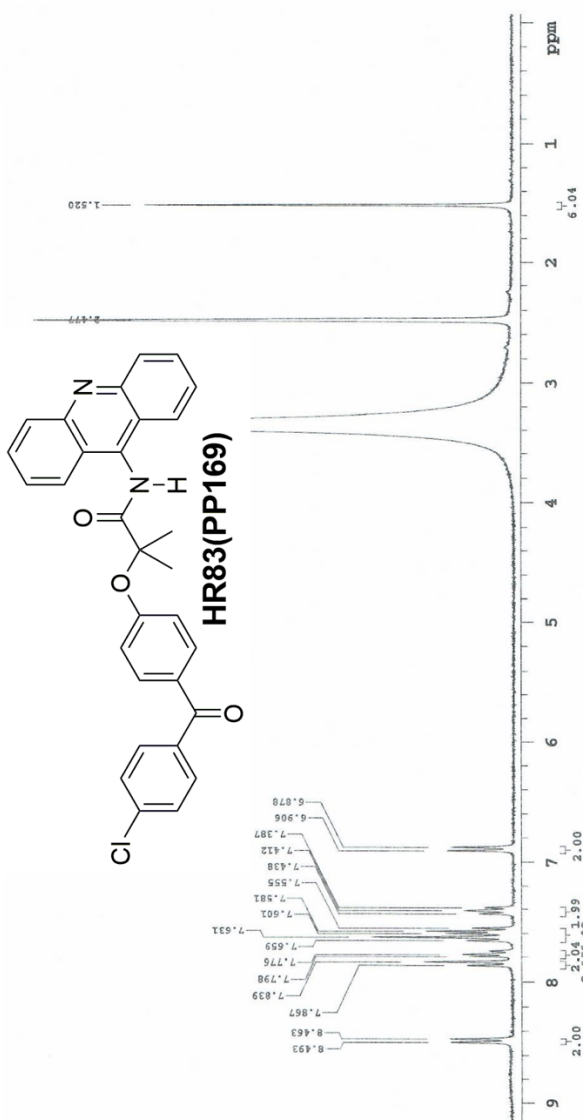

# <sup>1</sup>H-NMR (DMSO-d<sub>6</sub>) Varian Mercury 300

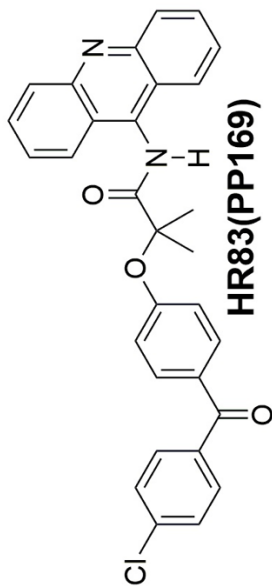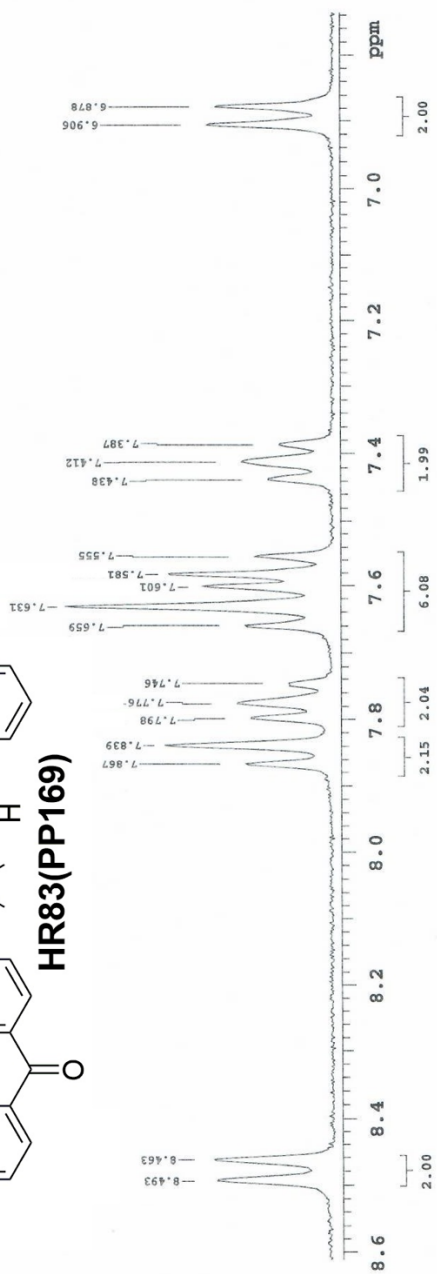

# <sup>1</sup>H-NMR (CDCl<sub>3</sub>) Varian Mercury 400 Plus

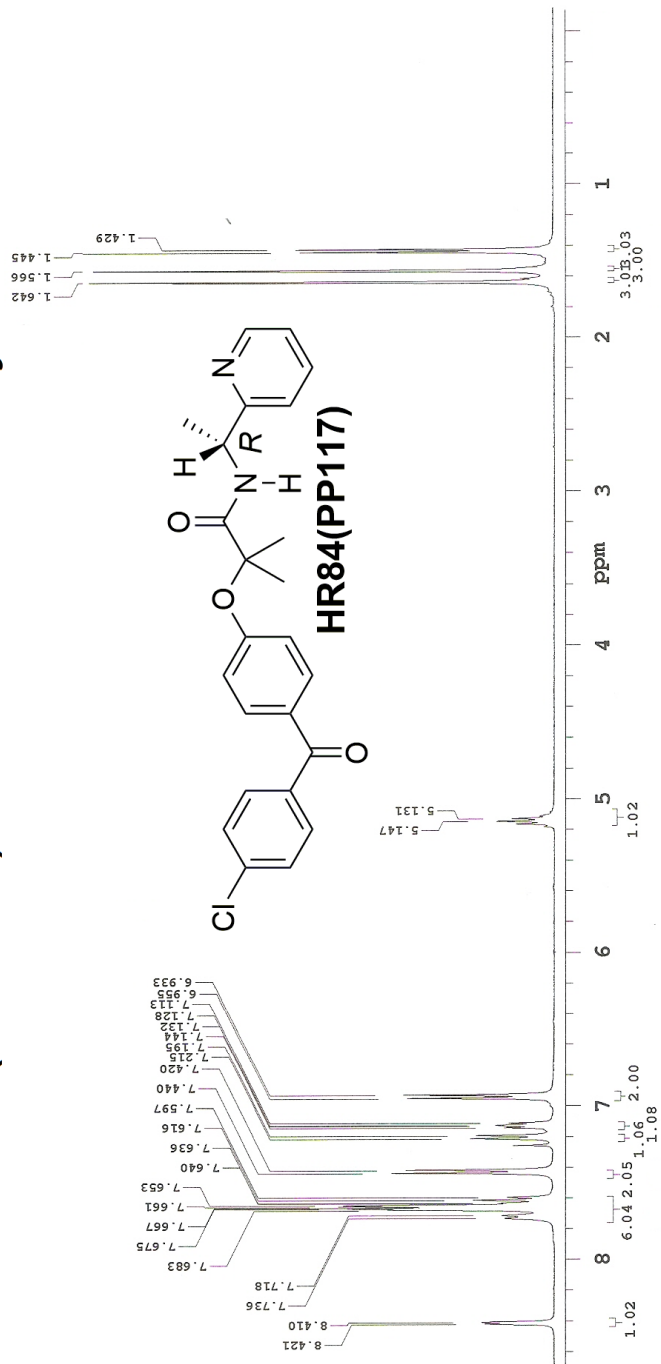

# $^1\text{H-NMR}$ ( $\text{CDCl}_3$ ) Varian Mercury 400 Plus

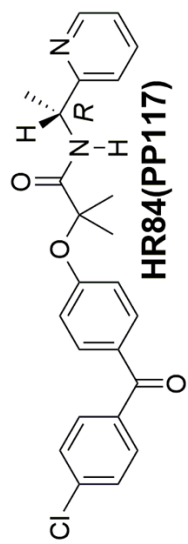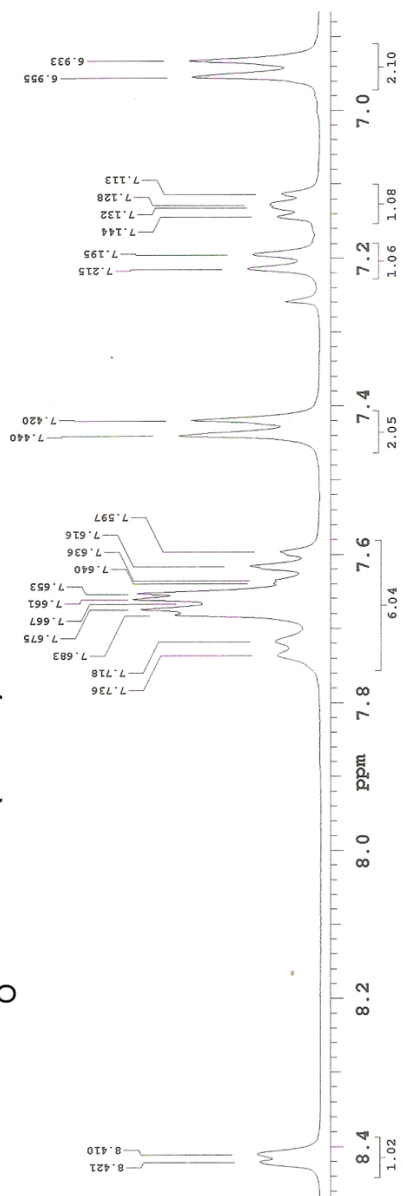

# $^{13}\text{C}$ -NMR ( $\text{CDCl}_3$ ) Varian Mercury 400 Plus

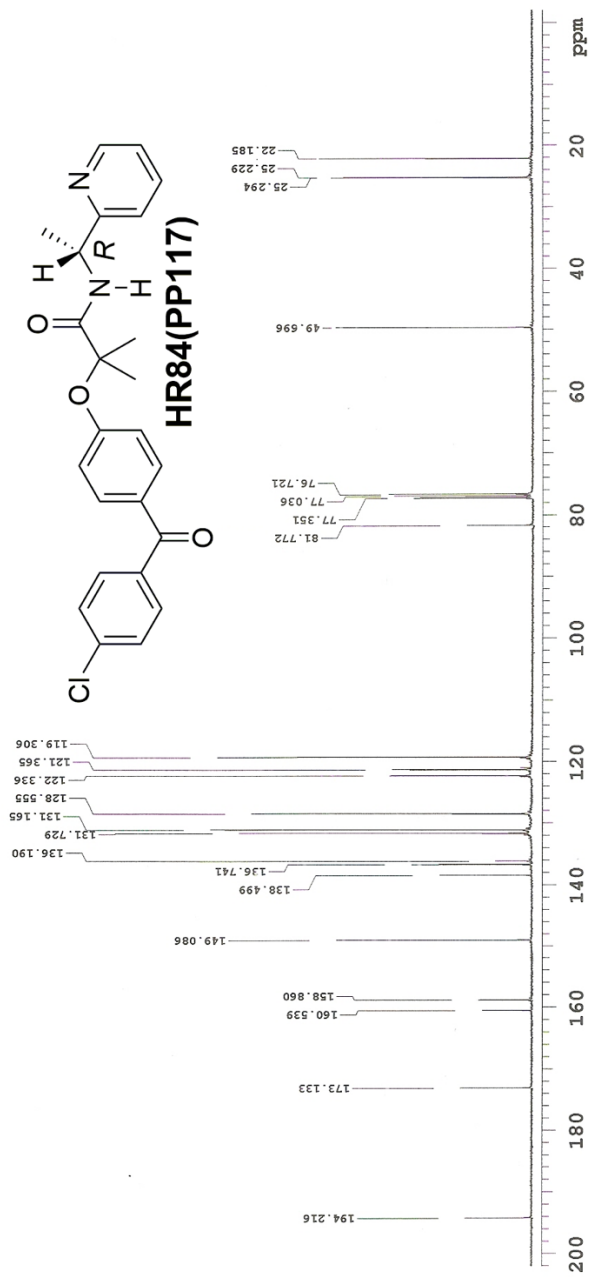

# $^1\text{H-NMR}$ ( $\text{CDCl}_3$ ) Varian Mercury 400 Plus

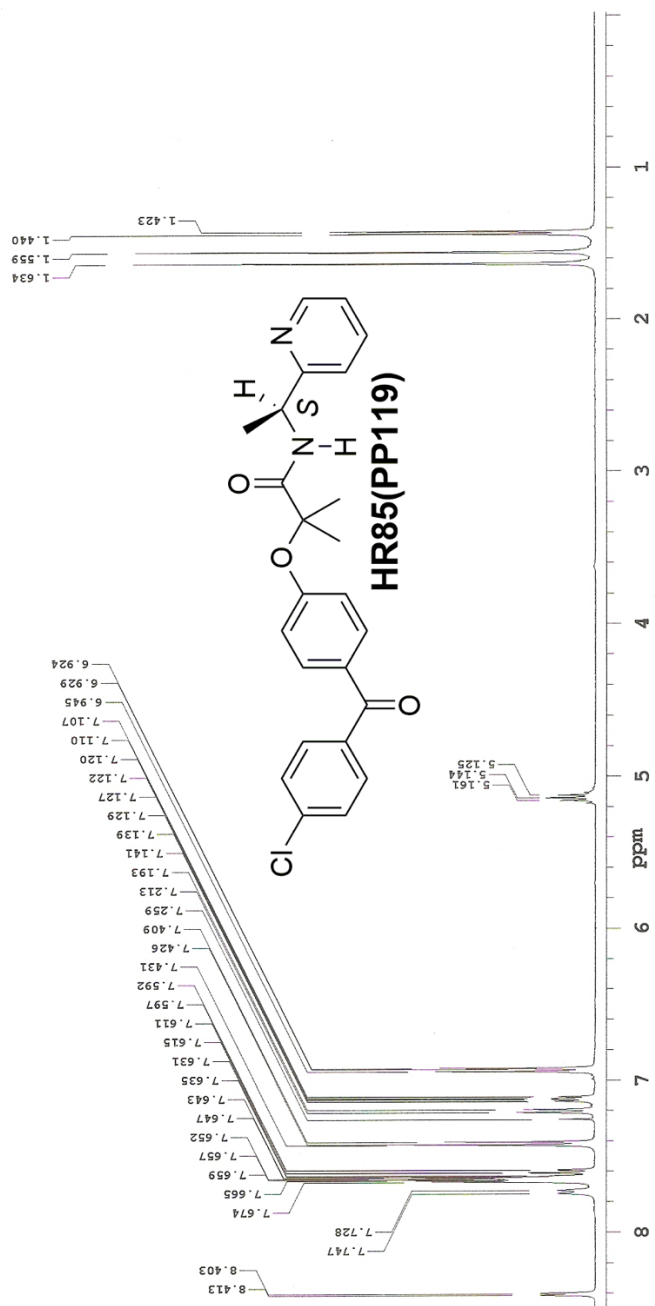

# <sup>1</sup>H-NMR (DMSO-d<sub>6</sub>) Varian Mercury 400 Plus

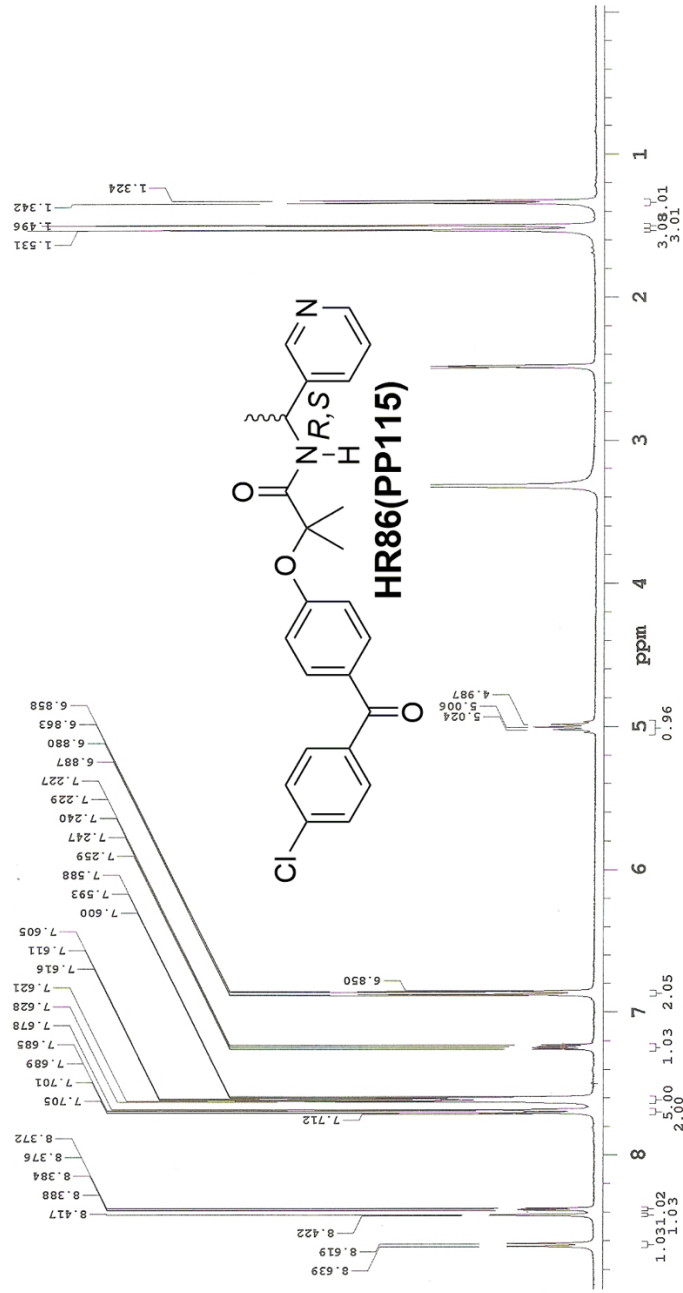

# <sup>1</sup>H-NMR(CDCl<sub>3</sub>) Varian Mercury 400 Plus

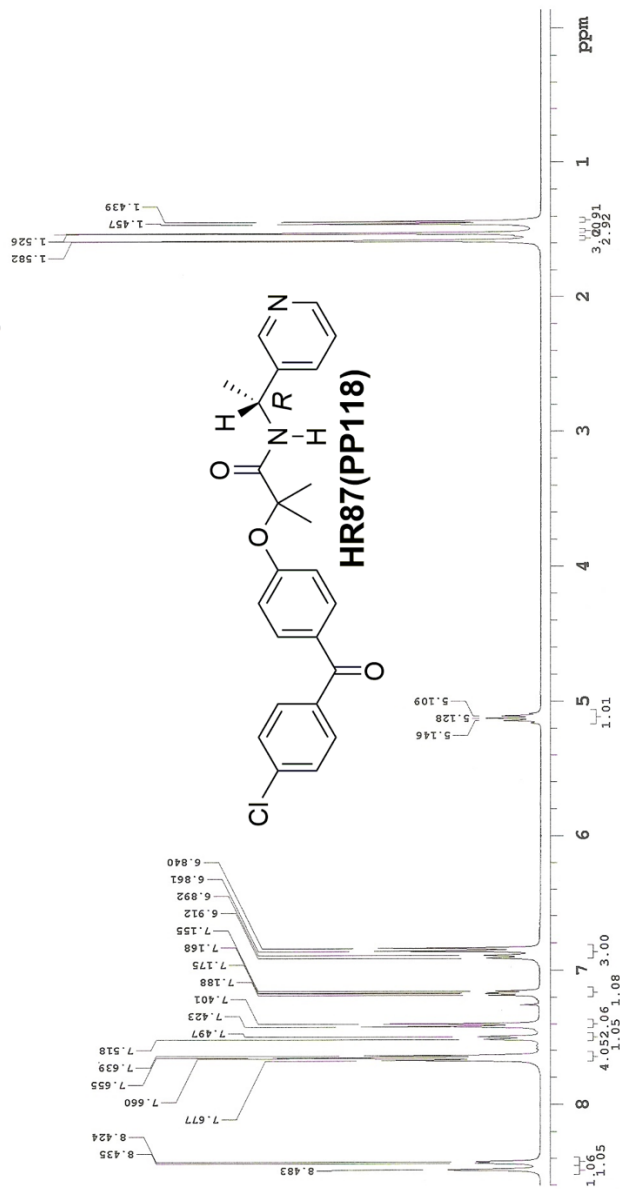

# $^1\text{H-NMR}(\text{CDCl}_3)$ Varian Mercury 400 Plus

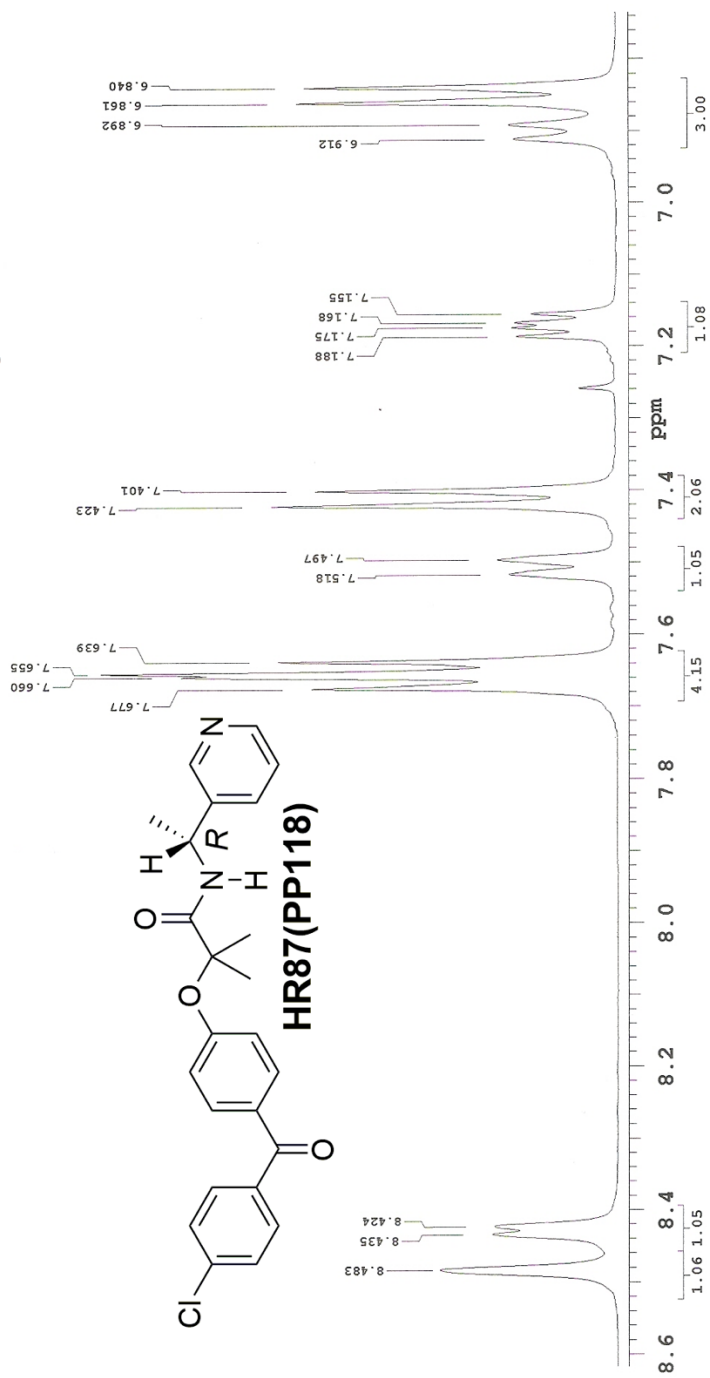

# $^{13}\text{C}$ -NMR( $\text{CDCl}_3$ ) Varian Mercury 400 Plus

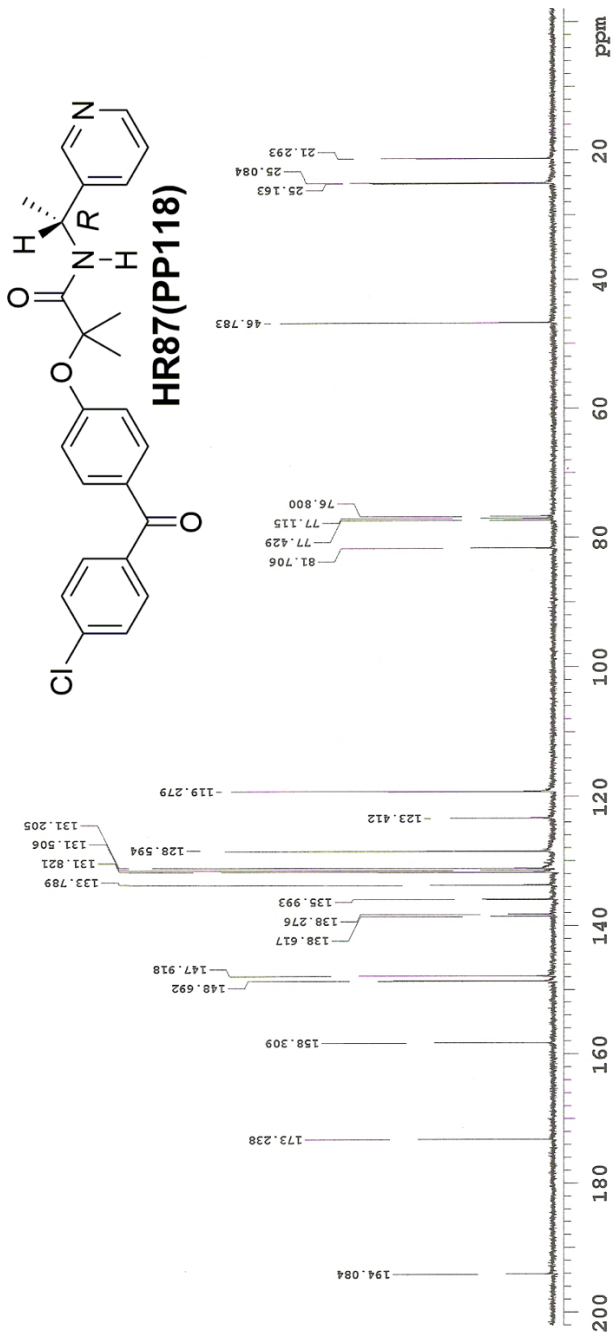

# <sup>1</sup>H-NMR (DMSO-d<sub>6</sub>) Varian Mercury 400 Plus

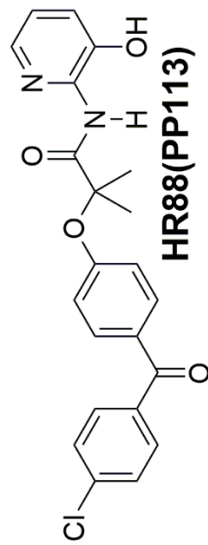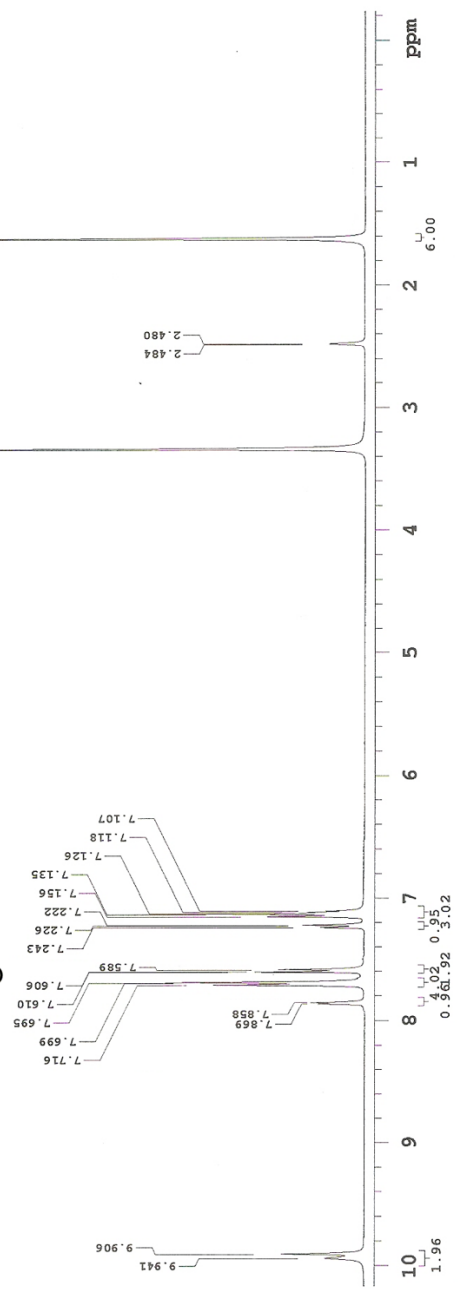

# <sup>13</sup>C-NMR(DMSO-d<sub>6</sub>) Varian Mercury 400 Plus

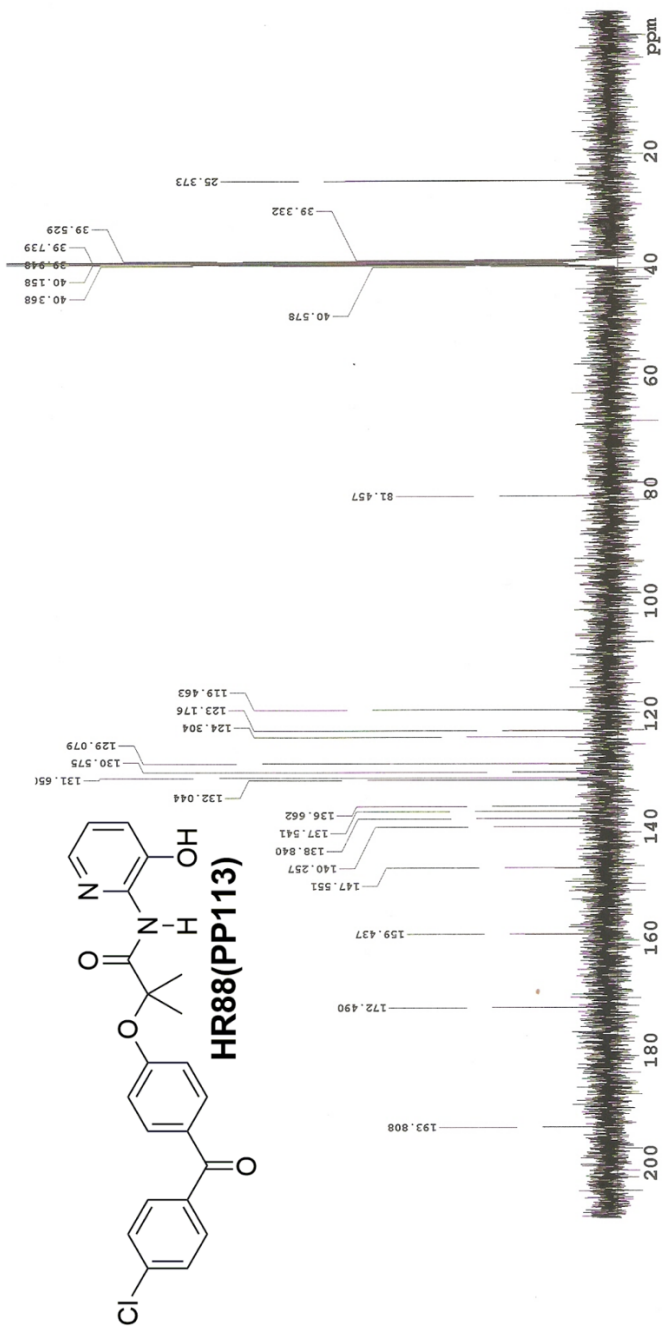

# $^1\text{H-NMR}$ (DMSO- $\text{d}_6$ ) Varian Mercury 400 Plus

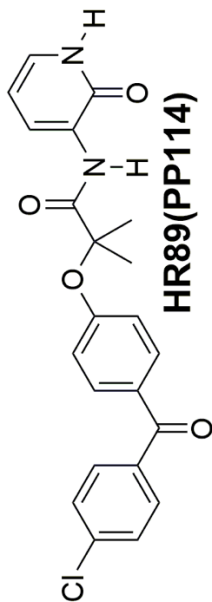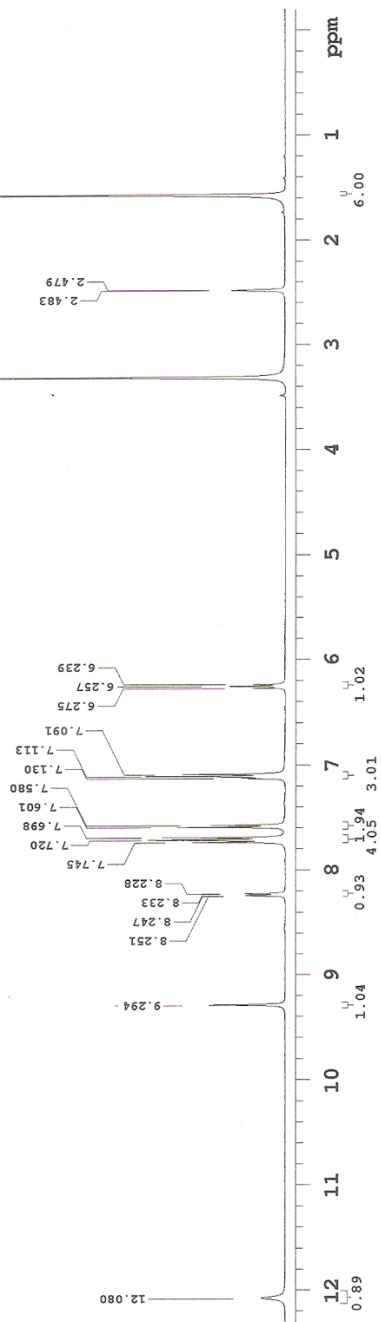

# <sup>1</sup>H-NMR (DMSO-d<sub>6</sub>) Varian Mercury 400 Plus

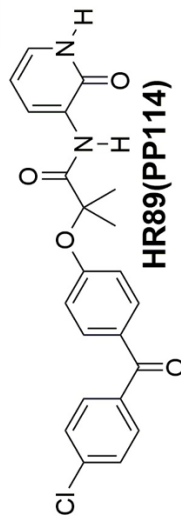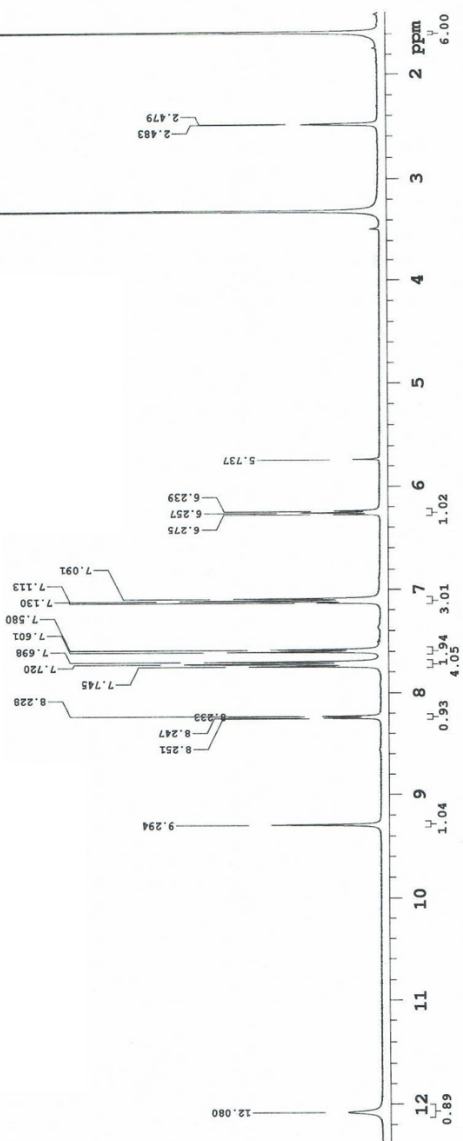

# <sup>1</sup>H-NMR (DMSO-d<sub>6</sub>) Varian Mercury 400 Plus

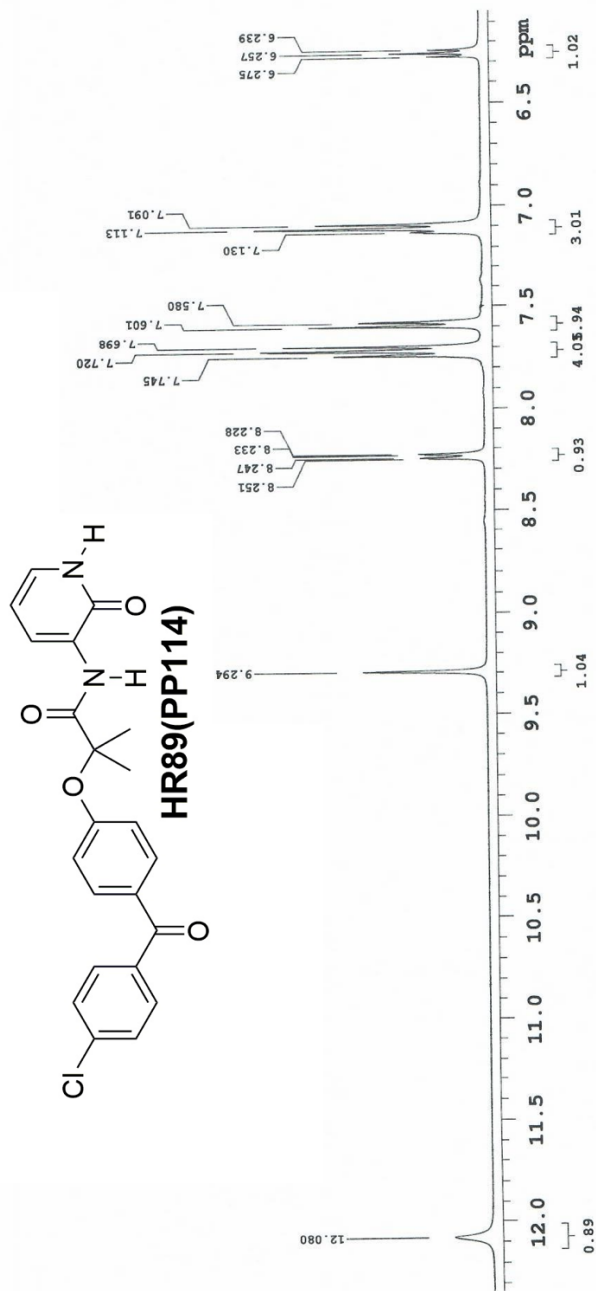

# <sup>1</sup>H-NMR (DMSO-d<sub>6</sub>) Varian Mercury 400 Plus

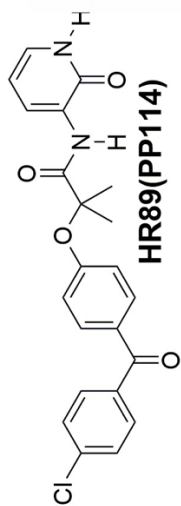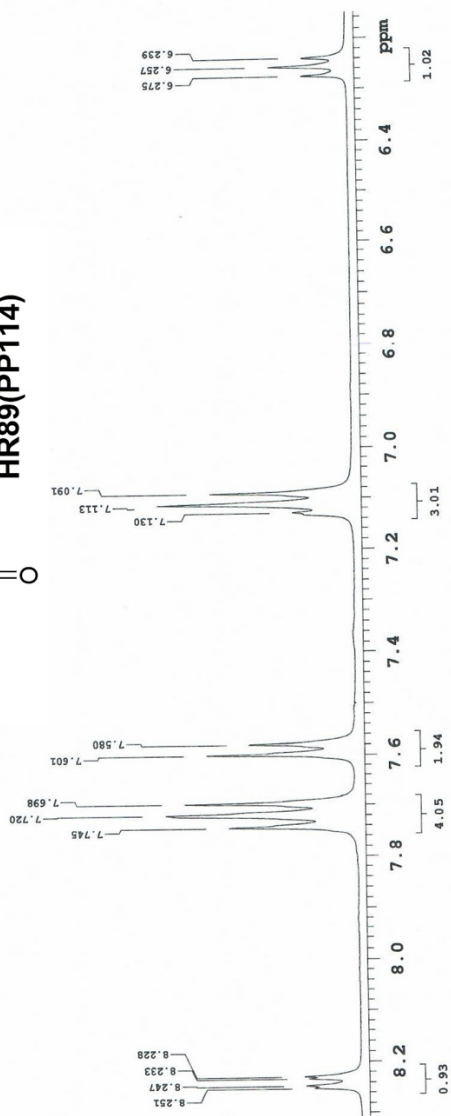

# <sup>13</sup>C-NMR (DMSO-d<sub>6</sub>) Varian Mercury 400 Plus

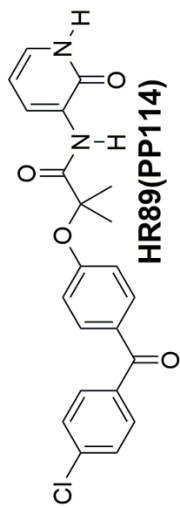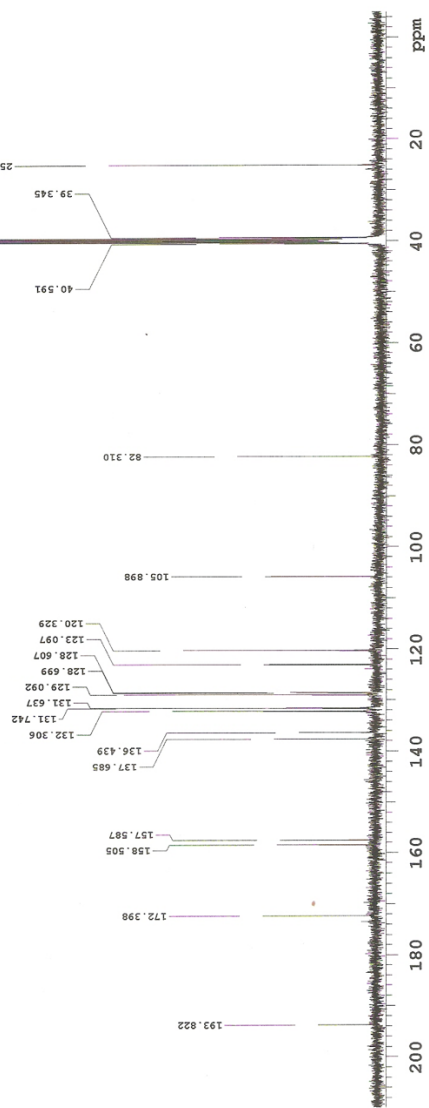

# <sup>1</sup>H-NMR (DMSO-d<sub>6</sub>) Varian Mercury 400 Plus

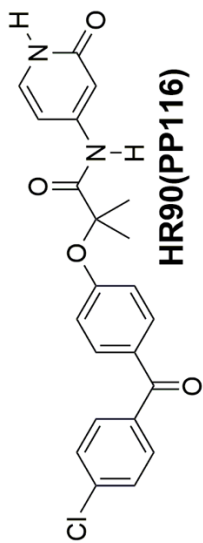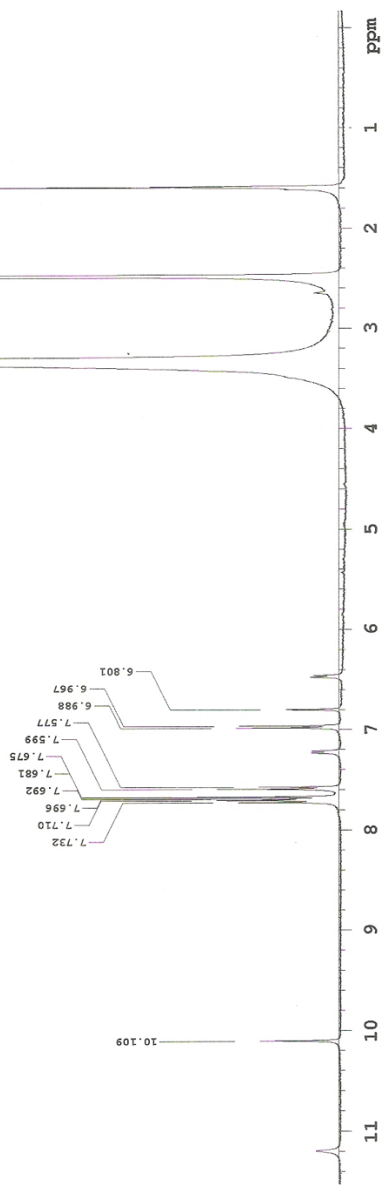

# <sup>1</sup>H-NMR (DMSO-d<sub>6</sub>) Varian Mercury 400 Plus

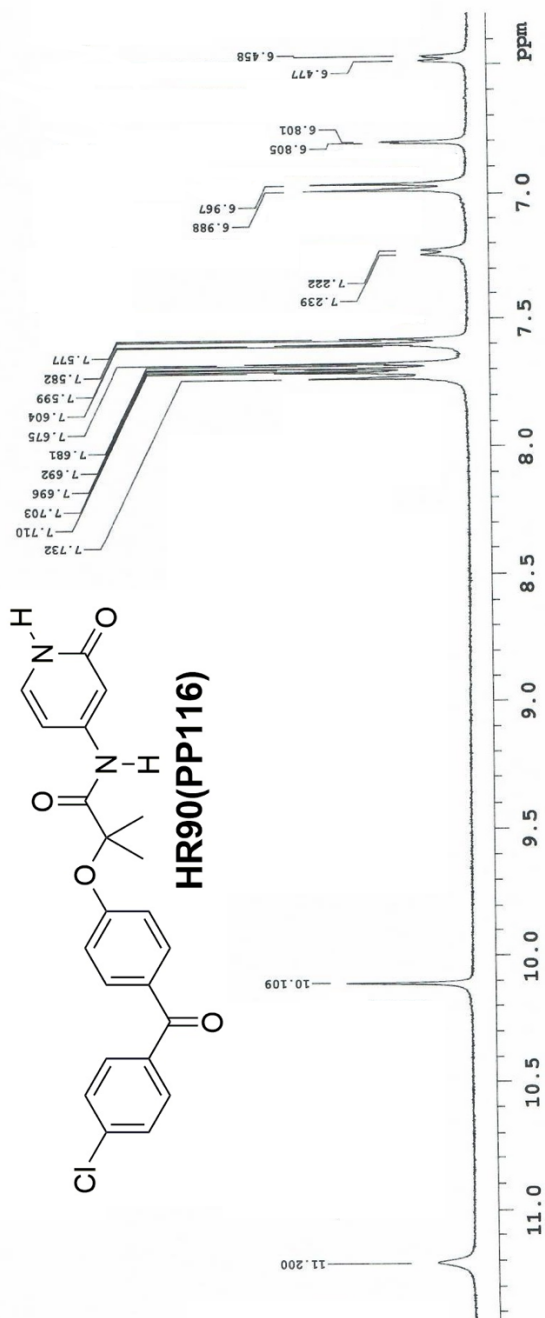

# $^1\text{H-NMR}$ (DMSO- $\text{d}_6$ ) Varian Mercury 400 Plus

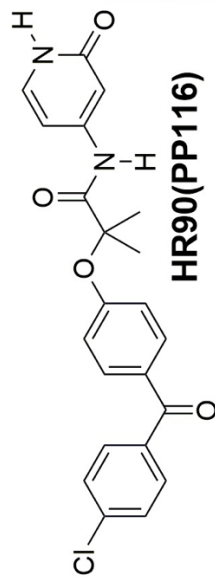

HR90(PP116)

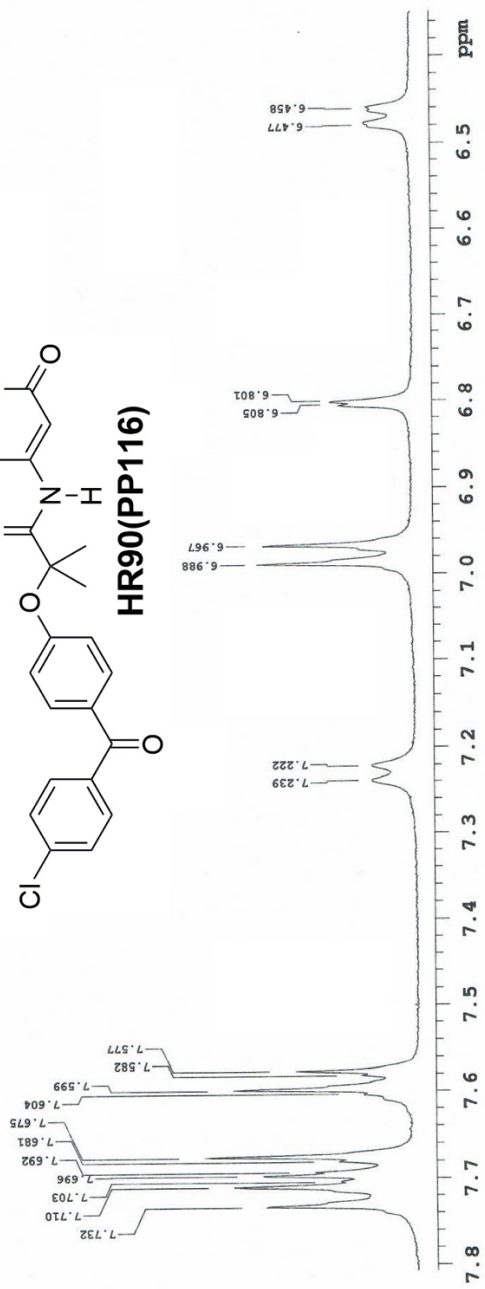

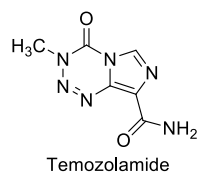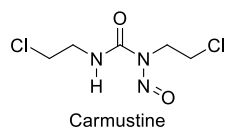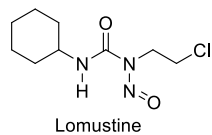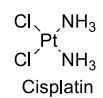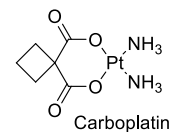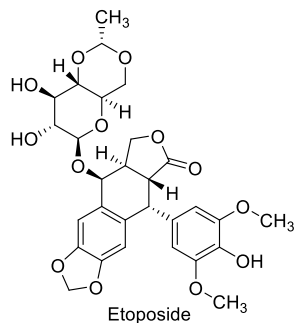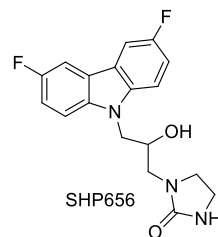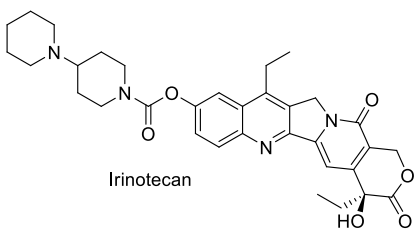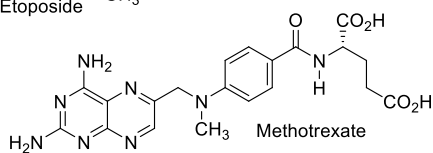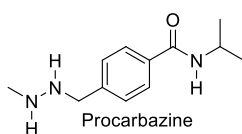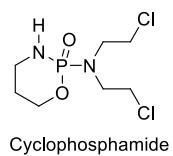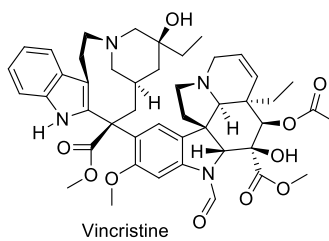

The most common chemotherapy drug combination used to treat brain and spinal cord tumors is PCV (procarbazine, lomustine and vincristine)

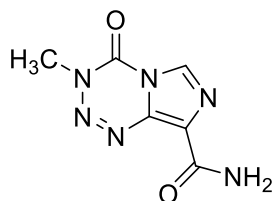

Temozolamide

| Calc. | MarvinSketch | IP             | RB | HLB | logS  | PL    | MPA   | MSA   | HBA    | MR | hERG <sub>AM</sub> | hERG <sub>CM</sub> |      |
|-------|--------------|----------------|----|-----|-------|-------|-------|-------|--------|----|--------------------|--------------------|------|
|       |              | T <sub>0</sub> | NA | 1   | 18.31 | -0.90 | 16.08 | 26.31 | 232.02 | 7  | 47.86              | 3.67               | safe |
| ClogP | -0.28        | 1.00           |    |     |       |       |       |       |        |    |                    |                    |      |
| ClogD | -0.28        | 1.00           |    |     |       |       |       |       |        |    |                    |                    |      |
| MW    | 194.15       | 1.00           |    |     |       |       |       |       |        |    |                    |                    |      |
| PSA   | 105.94       | 0.47           |    |     |       |       |       |       |        |    |                    |                    |      |
| HBD   | 2.00         | 0.50           |    |     |       |       |       |       |        |    |                    |                    |      |
| pKa   | -0.96        | 1.00           |    |     |       |       |       |       |        |    |                    |                    |      |
| MPO   | 4.97         |                |    |     |       |       |       |       |        |    |                    |                    |      |
| BBB   | 3.44         |                |    |     |       |       |       |       |        |    |                    |                    |      |
| LogBB | -1.47        |                |    |     |       |       |       |       |        |    |                    |                    |      |

IP = Isoelectric Point; RB = Number of rotatable bonds; HLB = hydrophilic-lipophilic balance; logS = water solubility; PL = polarizability(Å<sup>3</sup>); Minimal Projection Area (Å<sup>2</sup>); MSA = molecular surface area; HBA = hydrogen bond acceptors; MR = Molar refractivity; ClogD = distribution at pH = 7.4; PSA = polar surface area (Å<sup>2</sup>); HBD = hydrogen bond donors; pKa = estimated acid strength; MPO = score for CNS penetration; LogBB = blood-brain distribution (0.152ClogP – 0.0148PSA + 0.138);

hERG = estimated pIC50 (pAct) value for hERG (the human ether-a-go-go (hERG) ion channel); hERG<sub>AM</sub> = hERG activity model; hERG<sub>CM</sub> = hERG classification model

| BBB Score Calculator |        |                |
|----------------------|--------|----------------|
| Property             | Value  | T <sub>0</sub> |
| ARO_R_SCORE          | 2      | 1.00           |
| HA_SCORE             | 14     | 0.89           |
| MWHBN_SCORE          | 0.43   | 0.36           |
| TPSA_SCORE           | 105.94 | 0.26           |
| PKA_SCORE            | 8.81   | 1.00           |
| BBB SCORE            |        | 3.44           |

ARO\_R\_SCORE = Number of aromatic rings; HA\_SCORE = Number of heavy atoms.  
MWHNM\_SCORE =  $[-0.5MW(HBA+HBD)]$  where MW = molecular weight, HBA = number of hydrogen bond acceptor sites, and HBD = number of hydrogen bond donors;  
TPSA = topological polar surface area; PKA\_SCORE = Acidity strength. Gupta, M.; Lee, H. J.; Barden, C. J.; Weaver, D. "The Blood-Brain Barrier (BBB) Score" J. Med. Chem. 2019, 62 (21), 9824-9836.

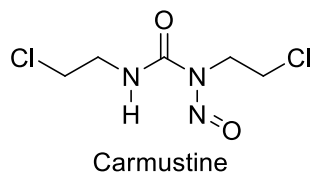

| Calc. | MarvinSketch |      | IP | RB | HLB   | logS  | PL    | MPA   | MSA   | HBA | MR    | hERG <sub>AM</sub> | hERG <sub>CM</sub> |
|-------|--------------|------|----|----|-------|-------|-------|-------|-------|-----|-------|--------------------|--------------------|
|       |              |      | NA | 5  | 14.05 | -2.38 | 17.32 | 29.69 | 61.77 | 4   | 46.98 | 3.49               | safe               |
| ClogP | 1.02         | 1.00 |    |    |       |       |       |       |       |     |       |                    |                    |
| ClogD | 1.02         | 1.00 |    |    |       |       |       |       |       |     |       |                    |                    |
| MW    | 214.05       | 1.00 |    |    |       |       |       |       |       |     |       |                    |                    |
| PSA   | 61.77        | 1.00 |    |    |       |       |       |       |       |     |       |                    |                    |
| HBD   | 1.00         | 0.75 |    |    |       |       |       |       |       |     |       |                    |                    |
| pKa   | -5.34        | 1.00 |    |    |       |       |       |       |       |     |       |                    |                    |
| MPO   | 5.75         |      |    |    |       |       |       |       |       |     |       |                    |                    |
| BBB   | 4.26         |      |    |    |       |       |       |       |       |     |       |                    |                    |
| LogBB | -0.62        |      |    |    |       |       |       |       |       |     |       |                    |                    |

IP = Isoelectric Point; RB = Number of rotatable bonds; HLB = hydrophilic-lipophilic balance; logS = water solubility; PL = polarizability( $\text{\AA}^3$ ); Minimal Projection Area ( $\text{\AA}^2$ ); MSA = molecular surface area; HBA = hydrogen bond acceptors; MR = Molar refractivity; ClogD = distribution at pH = 7.4; PSA = polar surface area; HBD = hydrogen bond donors; pKa = estimated acid strength; MPO = score for CNS penetration; LogBB = blood-brain distribution ( $0.152\text{ClogP} - 0.0148\text{PSA} + 0.138$ ); hERG = estimated pIC<sub>50</sub> (pAct) value for hERG (the human ether-a-go-go (hERG) ion channel); hERG<sub>AM</sub> = hERG activity model; hERG<sub>CM</sub> = hERG classification model

| BBB Score Calculator |       |                |
|----------------------|-------|----------------|
| Property             | Value | T <sub>0</sub> |
| ARO_R_SCORE          | 0     | 0.34           |
| HA_SCORE             | 12    | 0.79           |
| HWHBN_SCORE          | 0.21  | 1.00           |
| TPSA_SCORE           | 61.77 | 0.57           |
| PKA_SCORE            | 8.81  | 1.00           |
| BBB_SCORE            |       | 4.26           |

ARO\_R\_SCORE = Number of aromatic rings; HA\_SCORE = Number of heavy atoms.  
MWHNM\_SCORE =  $[-0.5MW(HBA+HBD)]$  where MW = molecular weight, HBA = number of hydrogen bond acceptor sites, and HBD = number of hydrogen bond donors;  
TPSA = topological polar surface area; PKA\_SCORE = Acidity strength. Gupta, M.; Lee, H. J.; Barden, C. J.; Weaver, D. "The Blood-Brain Barrier (BBB) Score" J. Med. Chem. 2019, 62 (21), 9824-9836.

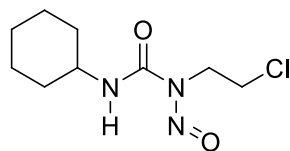

Lomustine

| Calc. | MarvinSketch |                | IP | RB | HLB   | logS  | PL    | MPA   | MSA    | HBA | MR    | hERG <sub>AM</sub> | hERG <sub>CM</sub> |
|-------|--------------|----------------|----|----|-------|-------|-------|-------|--------|-----|-------|--------------------|--------------------|
|       |              | T <sub>0</sub> | NA | 4  | 11.95 | -3.28 | 21.92 | 33.97 | 351.15 | 4   | 58.65 | 3.70               | safe               |
| ClogP | 2.16         | 1.00           |    |    |       |       |       |       |        |     |       |                    |                    |
| ClogD | 2.16         | 0.92           |    |    |       |       |       |       |        |     |       |                    |                    |
| MW    | 233.70       | 1.00           |    |    |       |       |       |       |        |     |       |                    |                    |
| PSA   | 61.77        | 1.00           |    |    |       |       |       |       |        |     |       |                    |                    |
| HBD   | 1.00         | 0.75           |    |    |       |       |       |       |        |     |       |                    |                    |
| pKa   | -5.35        | 1.00           |    |    |       |       |       |       |        |     |       |                    |                    |
| MPO   | 5.67         |                |    |    |       |       |       |       |        |     |       |                    |                    |
| BBB   | 4.40         |                |    |    |       |       |       |       |        |     |       |                    |                    |
| LogBB | -0.45        |                |    |    |       |       |       |       |        |     |       |                    |                    |

IP = Isoelectric Point; RB = Number of rotatable bonds; HLB = hydrophilic-lipophilic balance; logS = water solubility; PL = polarizability( $\text{\AA}^3$ ); Minimal Projection Area ( $\text{\AA}^2$ ); MSA = molecular surface area; HBA = hydrogen bond acceptors; MR = Molar refractivity; ClogD = distribution at pH = 7.4; PSA = polar surface area; HBD = hydrogen bond donors; pKa = estimated acid strength; MPO = score for CNS penetration; LogBB = blood-brain distribution ( $0.152\text{ClogP} - 0.0148\text{PSA} + 0.138$ ); hERG = estimated pIC<sub>50</sub> (pAct) value for hERG (the human ether-a-go-go (hERG) ion channel); hERG<sub>AM</sub> = hERG activity model; hERG<sub>CM</sub> = hERG classification model

| BBB Score Calculator |       |                |
|----------------------|-------|----------------|
| Property             | Value | T <sub>0</sub> |
| ARO_R_SCORE          | 0     | 0.34           |
| HA_SCORE             | 15    | 0.93           |
| HWHBN_SCORE          | 0.20  | 1.00           |
| TPSA_SCORE           | 61.77 | 0.57           |
| PKA_SCORE            | 8.81  | 1.00           |
| BBB_SCORE            |       | 4.40           |

ARO\_R\_SCORE = Number of aromatic rings; HA\_SCORE = Number of heavy atoms.  
MWHNM\_SCORE =  $[-0.5MW(HBA+HBD)]$  where MW = molecular weight, HBA = number of hydrogen bond acceptor sites, and HBD = number of hydrogen bond donors;  
TPSA = topological polar surface area; PKA\_SCORE = Acidity strength. Gupta, M.; Lee, H. J.; Barden, C. J.; Weaver, D. "The Blood-Brain Barrier (BBB) Score" J. Med. Chem. 2019, 62 (21), 9824-9836.

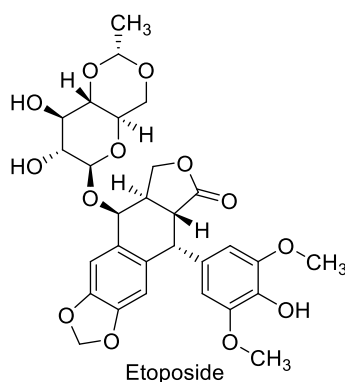

| Calc. | MarvinSketch |                | IP | RB | HLB   | logS  | PL    | MPA   | MSA    | HBA | MR     | hERG <sub>AM</sub> | hERG <sub>CM</sub> |
|-------|--------------|----------------|----|----|-------|-------|-------|-------|--------|-----|--------|--------------------|--------------------|
|       |              | T <sub>0</sub> | NA | 5  | 14.79 | -3.40 | 55.93 | 73.05 | 781.41 | 24  | 139.02 | 4.94               | safe               |
| ClogP | 1.16         | 1.00           |    |    |       |       |       |       |        |     |        |                    |                    |
| ClogD | 1.16         | 1.00           |    |    |       |       |       |       |        |     |        |                    |                    |
| MW    | 588.56       | 0.00           |    |    |       |       |       |       |        |     |        |                    |                    |
| PSA   | 160.83       | 0.00           |    |    |       |       |       |       |        |     |        |                    |                    |
| HBD   | 3.00         | 0.25           |    |    |       |       |       |       |        |     |        |                    |                    |
| pKa   | -3.69        | 1.00           |    |    |       |       |       |       |        |     |        |                    |                    |
| MPO   | 3.25         |                |    |    |       |       |       |       |        |     |        |                    |                    |
| BBB   | 1.74         |                |    |    |       |       |       |       |        |     |        |                    |                    |
| LogBB | -2.07        |                |    |    |       |       |       |       |        |     |        |                    |                    |

IP = Isoelectric Point; RB = Number of rotatable bonds; HLB = hydrophilic-lipophilic balance; logS = water solubility; PL = polarizability(Å<sup>3</sup>); Minimal Projection Area (Å<sup>2</sup>); MSA = molecular surface area; HBA = hydrogen bond acceptors; MR = Molar refractivity; ClogD = distribution at pH = 7.4; PSA = polar surface area; HBD = hydrogen bond donors; pKa = estimated acid strength; MPO = score for CNS penetration; LogBB = blood-brain distribution (0.152ClogP – 0.0148PSA + 0.138); hERG = estimated pIC<sub>50</sub> (pAct) value for hERG (the human ether-a-go-go (hERG) ion channel); hERG<sub>AM</sub> = hERG activity model; hERG<sub>CM</sub> = hERG classification model

| BBB Score Calculator |        |                |
|----------------------|--------|----------------|
| Property             | Value  | T <sub>0</sub> |
| ARO_R_SCORE          | 2      | 1.00           |
| HA_SCORE             | 42     | 0.24           |
| HWHBN_SCORE          | 0.62   | 0.00           |
| TPSA_SCORE           | 160.83 | 0.00           |
| PKA_SCORE            | 8.81   | 1.00           |
| BBB_SCORE            |        | 1.74           |

ARO\_R\_SCORE = Number of aromatic rings; HA\_SCORE = Number of heavy atoms.  
MWHNM\_SCORE =  $[-0.5MW(HBA+HBD)]$  where MW = molecular weight, HBA = number of hydrogen bond acceptor sites, and HBD = number of hydrogen bond donors;  
TPSA = topological polar surface area; PKA\_SCORE = Acidity strength. Gupta, M.; Lee, H. J.; Barden, C. J.; Weaver, D. "The Blood-Brain Barrier (BBB) Score" J. Med. Chem. 2019, 62 (21), 9824-9836.

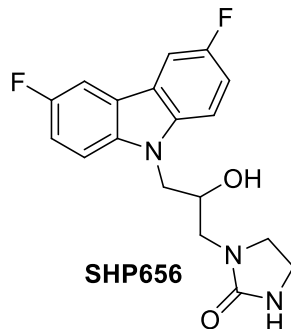

| Calc. | MarvinSketch   | IP   | RB | HLB   | logS  | PL    | MPA   | MSA    | HBA | MR    | hERG <sub>AM</sub> | hERG <sub>CM</sub> |
|-------|----------------|------|----|-------|-------|-------|-------|--------|-----|-------|--------------------|--------------------|
|       | T <sub>0</sub> | 5.95 | 4  | 12.29 | -4.07 | 35.63 | 44.34 | 459.71 | 4   | 88.66 | 5.06               | safe               |
| ClogP | 1.93           | 1.00 |    |       |       |       |       |        |     |       |                    |                    |
| ClogD | 1.93           | 1.00 |    |       |       |       |       |        |     |       |                    |                    |
| MW    | 345.35         | 1.00 |    |       |       |       |       |        |     |       |                    |                    |
| PSA   | 57.50          | 1.00 |    |       |       |       |       |        |     |       |                    |                    |
| HBD   | 2.00           | 0.50 |    |       |       |       |       |        |     |       |                    |                    |
| pKa   | -1.85          | 1.00 |    |       |       |       |       |        |     |       |                    |                    |
| MPO   | 5.50           |      |    |       |       |       |       |        |     |       |                    |                    |
| BBB   | 4.81           |      |    |       |       |       |       |        |     |       |                    |                    |
| LogBB | -0.42          |      |    |       |       |       |       |        |     |       |                    |                    |

IP = Isoelectric Point; RB = Number of rotatable bonds; HLB = hydrophilic-lipophilic balance; logS = water solubility; PL = polarizability(Å<sup>3</sup>); Minimal Projection Area (Å<sup>2</sup>); MSA = molecular surface area; HBA = hydrogen bond acceptors; MR = Molar refractivity; ClogD = distribution at pH = 7.4; PSA = polar surface area; HBD = hydrogen bond donors; pKa = estimated acid strength; MPO = score for CNS penetration; LogBB = blood-brain distribution (0.152ClogP – 0.0148PSA + 0.138); hERG = estimated pIC50 (pAct) value for hERG (the human ether-a-go-go (hERG) ion channel); hERG<sub>AM</sub> = hERG activity model; hERG<sub>CM</sub> = hERG classification model

| BBB Score Calculator |       |                |
|----------------------|-------|----------------|
| Property             | Value | T <sub>0</sub> |
| ARO_R_SCORE          | 3.00  | 0.69           |
| HA_SCORE             | 25.00 | 0.52           |
| HWHBN_SCORE          | 0.22  | 1.00           |
| TPSA_SCORE           | 57.50 | 0.60           |
| PKA_SCORE            | 8.81  | 1.00           |
| BBB_SCORE            |       | 4.81           |

ARO\_R\_SCORE = Number of aromatic rings; HA\_SCORE = Number of heavy atoms.  
MWHNM\_SCORE =  $[-0.5MW(HBA+HBD)]$  where MW = molecular weight, HBA = number of hydrogen bond acceptor sites, and HBD = number of hydrogen bond donors;  
TPSA = topological polar surface area; PKA\_SCORE = Acidity strength. Gupta, M.; Lee, H. J.; Barden, C. J.; Weaver, D. "The Blood-Brain Barrier (BBB) Score" J. Med. Chem. 2019, 62 (21), 9824-9836.

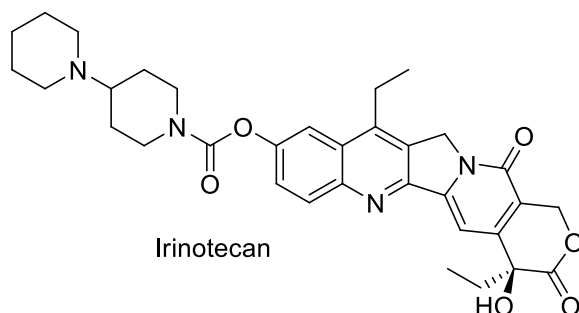

| Calc. | MarvinSketch |                | IP    | RB | HLB   | logS      | PL    | MPA   | MSA    | HBA | MR     | hERG <sub>AM</sub> | hERG <sub>CM</sub> |
|-------|--------------|----------------|-------|----|-------|-----------|-------|-------|--------|-----|--------|--------------------|--------------------|
|       |              | T <sub>0</sub> | 10.51 | 5  | 17.01 | -<br>3.47 | 63.01 | 67.37 | 841.25 | 10  | 161.33 | 5.49               | toxic              |
| ClogP | 2.78         | 1.00           |       |    |       |           |       |       |        |     |        |                    |                    |
| ClogD | 1.00         | 1.00           |       |    |       |           |       |       |        |     |        |                    |                    |
| MW    | 586.69       | 0.00           |       |    |       |           |       |       |        |     |        |                    |                    |
| PSA   | 112.51       | 0.25           |       |    |       |           |       |       |        |     |        |                    |                    |
| HBD   | 1.00         | 0.75           |       |    |       |           |       |       |        |     |        |                    |                    |
| pKa   | 9.17         | 0.41           |       |    |       |           |       |       |        |     |        |                    |                    |
| MPO   | 3.41         |                |       |    |       |           |       |       |        |     |        |                    |                    |
| BBB   | 3.13         |                |       |    |       |           |       |       |        |     |        |                    |                    |
| LogBB | -1.10        |                |       |    |       |           |       |       |        |     |        |                    |                    |

IP = Isoelectric Point; RB = Number of rotatable bonds; HLB = hydrophilic-lipophilic balance; logS = water solubility; PL = polarizability(Å<sup>3</sup>); Minimal Projection Area (Å<sup>2</sup>); MSA = molecular surface area; HBA = hydrogen bond acceptors; MR = Molar refractivity; ClogD = distribution at pH = 7.4; PSA = polar surface area; HBD = hydrogen bond donors; pKa = estimated acid strength; MPO = score for CNS penetration; LogBB = blood-brain distribution (0.152ClogP – 0.0148PSA + 0.138); hERG = estimated pIC50 (pAct) value for hERG (the human ether-a-go-go (hERG) ion channel); hERG<sub>AM</sub> = hERG activity model; hERG<sub>CM</sub> = hERG classification model

| BBB Score Calculator |        |                |
|----------------------|--------|----------------|
| Property             | Value  | T <sub>0</sub> |
| ARO_R_SCORE          | 3      | 0.69           |
| HA_SCORE             | 43     | 0.21           |
| HWHBN_SCORE          | 0.29   | 0.87           |
| TPSA_SCORE           | 112.51 | 0.21           |
| PKA_SCORE            | 9.17   | 0.99           |
| BBB_SCORE            |        | 3.13           |

ARO\_R\_SCORE = Number of aromatic rings; HA\_SCORE = Number of heavy atoms.  
MWHNM\_SCORE =  $[-0.5MW(HBA+HBD)]$  where MW = molecular weight, HBA = number of hydrogen bond acceptor sites, and HBD = number of hydrogen bond donors;  
TPSA = topological polar surface area; PKA\_SCORE = Acidity strength. Gupta, M.; Lee, H. J.; Barden, C. J.; Weaver, D. "The Blood-Brain Barrier (BBB) Score" J. Med. Chem. 2019, 62 (21), 9824-9836.

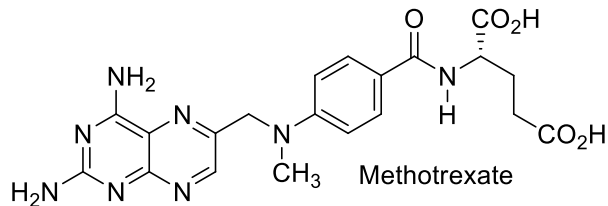

| Calc. | MarvinSketch   | IP   | RB | HLB   | logS | PL    | MPA   | MSA    | HBA | MR     | hERG <sub>AM</sub> | hERG <sub>CM</sub> |
|-------|----------------|------|----|-------|------|-------|-------|--------|-----|--------|--------------------|--------------------|
|       | T <sub>0</sub> | 3.16 | 9  | 15.30 | 0.00 | 43.52 | 55.08 | 601.64 | 17  | 119.21 | 4.71               | safe               |
| ClogP | -1.63          | 1.00 |    |       |      |       |       |        |     |        |                    |                    |
| ClogD | -5.70          | 1.00 |    |       |      |       |       |        |     |        |                    |                    |
| MW    | 454.45         | 0.33 |    |       |      |       |       |        |     |        |                    |                    |
| PSA   | 210.54         | 0.00 |    |       |      |       |       |        |     |        |                    |                    |
| HBD   | 7.00           | 0.00 |    |       |      |       |       |        |     |        |                    |                    |
| pKa   | 5.57           | 1.00 |    |       |      |       |       |        |     |        |                    |                    |
| MPO   | 3.33           |      |    |       |      |       |       |        |     |        |                    |                    |
| BBB   | 1.55           |      |    |       |      |       |       |        |     |        |                    |                    |
| LogBB | -3.04          |      |    |       |      |       |       |        |     |        |                    |                    |

IP = Isoelectric Point; RB = Number of rotatable bonds; HLB = hydrophilic-lipophilic balance; logS = water solubility; PL = polarizability(Å<sup>3</sup>); Minimal Projection Area (Å<sup>2</sup>); MSA = molecular surface area; HBA = hydrogen bond acceptors; MR = Molar refractivity; ClogD = distribution at pH = 7.4; PSA = polar surface area; HBD = hydrogen bond donors; pKa = estimated acid strength; MPO = score for CNS penetration; LogBB = blood-brain distribution (0.152ClogP – 0.0148PSA + 0.138); hERG = estimated pIC<sub>50</sub> (pAct) value for hERG (the human ether-a-go-go (hERG) ion channel); hERG<sub>AM</sub> = hERG activity model; hERG<sub>CM</sub> = hERG classification model.

| BBB Score Calculator |        |                |
|----------------------|--------|----------------|
| Property             | Value  | T <sub>0</sub> |
| ARO_R_SCORE          | 3      | 0.69           |
| HA_SCORE             | 33     | 0.61           |
| HWHBN_SCORE          | 0.80   | 0.00           |
| TPSA_SCORE           | 210.54 | 0.00           |
| PKA_SCORE            | 5.57   | 0.48           |
| BBB_SCORE            |        | 1.55           |

ARO\_R\_SCORE = Number of aromatic rings; HA\_SCORE = Number of heavy atoms.  
MWHNM\_SCORE =  $[-0.5MW(HBA+HBD)]$  where MW = molecular weight, HBA = number of hydrogen bond acceptor sites, and HBD = number of hydrogen bond donors;  
TPSA = topological polar surface area; PKA\_SCORE = Acidity strength. Gupta, M.; Lee, H. J.; Barden, C. J.; Weaver, D. "The Blood-Brain Barrier (BBB) Score" J. Med. Chem. 2019, 62 (21), 9824-9836.

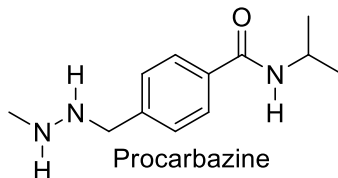

| Calc. | MarvinSketch |                | IP    | RB | HLB   | logS  | PL    | MPA   | MSA    | HBA | MR    | hERG <sub>AM</sub> | hERG <sub>CM</sub> |
|-------|--------------|----------------|-------|----|-------|-------|-------|-------|--------|-----|-------|--------------------|--------------------|
|       |              | T <sub>0</sub> | 11.66 | 5  | 22.85 | -1.02 | 25.22 | 38.17 | 376.41 | 4   | 86.98 | 4.84               | Safe               |
| ClogP | 0.99         | 1.00           |       |    |       |       |       |       |        |     |       |                    |                    |
| ClogD | -0.01        | 1.00           |       |    |       |       |       |       |        |     |       |                    |                    |
| MW    | 221.30       | 1.00           |       |    |       |       |       |       |        |     |       |                    |                    |
| PSA   | 53.16        | 1.00           |       |    |       |       |       |       |        |     |       |                    |                    |
| HBD   | 3.00         | 0.25           |       |    |       |       |       |       |        |     |       |                    |                    |
| pKa   | 8.36         | 0.82           |       |    |       |       |       |       |        |     |       |                    |                    |
| MPO   | 5.07         |                |       |    |       |       |       |       |        |     |       |                    |                    |
| BBB   | 4.22         |                |       |    |       |       |       |       |        |     |       |                    |                    |
| LogBB | -0.49        |                |       |    |       |       |       |       |        |     |       |                    |                    |

IP = Isoelectric Point; RB = Number of rotatable bonds; HLB = hydrophilic-lipophilic balance; logS = water solubility; PL = polarizability( $\text{\AA}^3$ ); Minimal Projection Area ( $\text{\AA}^2$ ); MSA = molecular surface area; HBA = hydrogen bond acceptors; MR = Molar refractivity; ClogD = distribution at pH = 7.4; PSA = polar surface area; HBD = hydrogen bond donors; pKa = estimated acid strength; MPO = score for CNS penetration; LogBB = blood-brain distribution ( $0.152\text{ClogP} - 0.0148\text{PSA} + 0.138$ ); hERG = estimated pIC<sub>50</sub> (pAct) value for hERG (the human ether-a-go-go (hERG) ion channel); hERG<sub>AM</sub> = hERG activity model; hERG<sub>CM</sub> = hERG classification model.

| BBB Score Calculator |       |                |
|----------------------|-------|----------------|
| Property             | Value | T <sub>0</sub> |
| ARO_R_SCORE          | 1     | 0.82           |
| HA_SCORE             | 16    | 0.95           |
| HWHBN_SCORE          | 0.40  | 0.46           |
| TPSA_SCORE           | 53.16 | 0.63           |
| PKA_SCORE            | 8.36  | 0.99           |
| BBB_SCORE            |       | 4.22           |

ARO\_R\_SCORE = Number of aromatic rings; HA\_SCORE = Number of heavy atoms.  
MWHNM\_SCORE =  $[-0.5MW(HBA+HBD)]$  where MW = molecular weight, HBA = number of hydrogen bond acceptor sites, and HBD = number of hydrogen bond donors;  
TPSA = topological polar surface area; PKA\_SCORE = Acidity strength. Gupta, M.; Lee, H. J.; Barden, C. J.; Weaver, D. "The Blood-Brain Barrier (BBB) Score" J. Med. Chem. 2019, 62 (21), 9824-9836.

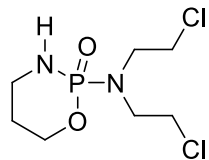

Cyclophosphamide

| Calc. | MarvinSketch |                | IP | RB | HLB   | logS  | PL    | MPA   | MSA    | HBA | MR    | hERG <sub>AM</sub> | hERG <sub>CM</sub> |
|-------|--------------|----------------|----|----|-------|-------|-------|-------|--------|-----|-------|--------------------|--------------------|
|       |              | T <sub>0</sub> | NA | 5  | 13.24 | -1.27 | 23.02 | 44.34 | 355.40 | 2   | 58.48 | 3.32               | safe               |
| ClogP | 0.10         | 1.00           |    |    |       |       |       |       |        |     |       |                    |                    |
| ClogD | 0.10         | 1.00           |    |    |       |       |       |       |        |     |       |                    |                    |
| MW    | 261.08       | 1.00           |    |    |       |       |       |       |        |     |       |                    |                    |
| PSA   | 41.57        | 1.00           |    |    |       |       |       |       |        |     |       |                    |                    |
| HBD   | 1.00         | 0.75           |    |    |       |       |       |       |        |     |       |                    |                    |
| pKa   | 0.00         | 1.00           |    |    |       |       |       |       |        |     |       |                    |                    |
| MPO   | 5.75         |                |    |    |       |       |       |       |        |     |       |                    |                    |
| BBB   | 4.41         |                |    |    |       |       |       |       |        |     |       |                    |                    |
| LogBB | -0.46        |                |    |    |       |       |       |       |        |     |       |                    |                    |

IP = Isoelectric Point; RB = Number of rotatable bonds; HLB = hydrophilic-lipophilic balance; logS = water solubility; PL = polarizability(Å<sup>3</sup>); Minimal Projection Area (Å<sup>2</sup>); MSA = molecular surface area; HBA = hydrogen bond acceptors; MR = Molar refractivity; ClogD = distribution at pH = 7.4; PSA = polar surface area; HBD = hydrogen bond donors; pKa = estimated acid strength; MPO = score for CNS penetration; LogBB = blood-brain distribution (0.152ClogP – 0.0148PSA + 0.138); hERG = estimated pIC50 (pAct) value for hERG (the human ether-a-go-go (hERG) ion channel); hERG<sub>AM</sub> = hERG activity model; hERG<sub>CM</sub> = hERG classification model.

| BBB Score Calculator |       |                |
|----------------------|-------|----------------|
| Property             | Value | T <sub>0</sub> |
| ARO_R_SCORE          | 0     | 0.34           |
| HA_SCORE             | 14    | 0.89           |
| HWHBN_SCORE          | 0.12  | 0.85           |
| TPSA_SCORE           | 41.57 | 0.71           |
| PKA_SCORE            | 8.81  | 1.00           |
| BBB_SCORE            |       | 4.41           |

ARO\_R\_SCORE = Number of aromatic rings; HA\_SCORE = Number of heavy atoms.  
MWHNM\_SCORE =  $[-0.5MW(HBA+HBD)]$  where MW = molecular weight, HBA = number of hydrogen bond acceptor sites, and HBD = number of hydrogen bond donors;  
TPSA = topological polar surface area; PKA\_SCORE = Acidity strength. Gupta, M.; Lee, H. J.; Barden, C. J.; Weaver, D. "The Blood-Brain Barrier (BBB) Score" J. Med. Chem. 2019, 62 (21), 9824-9836.

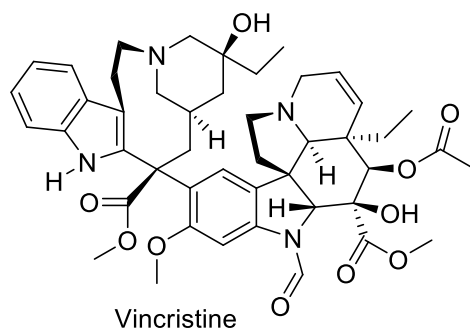

| Calc. | MarvinSketch |                | IP   | RB | HLB   | logS  | PL    | MPA   | MSA | HBA | MR     | hERG <sub>AM</sub> | hERG <sub>CM</sub> |
|-------|--------------|----------------|------|----|-------|-------|-------|-------|-----|-----|--------|--------------------|--------------------|
|       |              | T <sub>0</sub> | 9.81 | 10 | 22.96 | -2.04 | 87.84 | 99.55 | NA  | 16  | 221.48 | 5.16               | toxic              |
| ClogP | 3.13         | 0.94           |      |    |       |       |       |       |     |     |        |                    |                    |
| ClogD | 1.54         | 1.00           |      |    |       |       |       |       |     |     |        |                    |                    |
| MW    | 824.97       | 0.00           |      |    |       |       |       |       |     |     |        |                    |                    |
| PSA   | 171.17       | 0.00           |      |    |       |       |       |       |     |     |        |                    |                    |
| HBD   | 3.00         | 0.25           |      |    |       |       |       |       |     |     |        |                    |                    |
| pKa   | 8.42         | 0.79           |      |    |       |       |       |       |     |     |        |                    |                    |
| MPO   | 2.97         |                |      |    |       |       |       |       |     |     |        |                    |                    |
| BBB   | 1.80         |                |      |    |       |       |       |       |     |     |        |                    |                    |
| LogBB | -1.92        |                |      |    |       |       |       |       |     |     |        |                    |                    |

IP = Isoelectric Point; RB = Number of rotatable bonds; HLB = hydrophilic-lipophilic balance; logS = water solubility; PL = polarizability( $\text{\AA}^3$ ); Minimal Projection Area ( $\text{\AA}^2$ ); MSA = molecular surface area; HBA = hydrogen bond acceptors; MR = Molar refractivity; ClogD = distribution at pH = 7.4; PSA = polar surface area; HBD = hydrogen bond donors; pKa = estimated acid strength; MPO = score for CNS penetration; LogBB = blood-brain distribution ( $0.152\text{ClogP} - 0.0148\text{PSA} + 0.138$ ); hERG = estimated pIC50 (pAct) value for hERG (the human ether-a-go-go (hERG) ion channel); hERG<sub>AM</sub> = hERG activity model; hERG<sub>CM</sub> = hERG classification model.

| BBB Score Calculator |        |                |
|----------------------|--------|----------------|
| Property             | Value  | T <sub>0</sub> |
| ARO_R_SCORE          | 3      | 0.69           |
| HA_SCORE             | 60     | 0.00           |
| HWHBN_SCORE          | 0.42   | 0.41           |
| TPSA_SCORE           | 171.17 | 0.00           |
| PKA_SCORE            | 8.42   | 0.99           |
| BBB_SCORE            |        | 1.80           |

ARO\_R\_SCORE = Number of aromatic rings; HA\_SCORE = Number of heavy atoms.  
MWHNM\_SCORE =  $[-0.5MW(HBA+HBD)]$  where MW = molecular weight, HBA = number of hydrogen bond acceptor sites, and HBD = number of hydrogen bond donors;  
TPSA = topological polar surface area; PKA\_SCORE = Acidity strength. Gupta, M.; Lee, H. J.; Barden, C. J.; Weaver, D. "The Blood-Brain Barrier (BBB) Score" J. Med. Chem. 2019, 62 (21), 9824-9836.

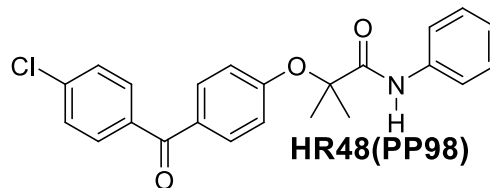

| Calc. | MarvinSketch |                | IP | RB | HLB  | logS      | PL    | MPA   | MSA    | HBA | MR     | hERG <sub>AM</sub> | hERG <sub>CM</sub> |
|-------|--------------|----------------|----|----|------|-----------|-------|-------|--------|-----|--------|--------------------|--------------------|
|       |              | T <sub>0</sub> | NA | 6  | 2.88 | -<br>7.07 | 42.67 | 45.91 | 551.01 | 6   | 111.47 | 5.30               | safe               |
| ClogP | 5.79         | 0.00           |    |    |      |           |       |       |        |     |        |                    |                    |
| ClogD | 5.79         | 0.00           |    |    |      |           |       |       |        |     |        |                    |                    |
| MW    | 393.87       | 0.76           |    |    |      |           |       |       |        |     |        |                    |                    |
| PSA   | 55.40        | 1.00           |    |    |      |           |       |       |        |     |        |                    |                    |
| HBD   | 1.00         | 0.75           |    |    |      |           |       |       |        |     |        |                    |                    |
| pKa   | -4.93        | 1.00           |    |    |      |           |       |       |        |     |        |                    |                    |
| MPO   | 3.51         |                |    |    |      |           |       |       |        |     |        |                    |                    |
| BBB   | 4.74         |                |    |    |      |           |       |       |        |     |        |                    |                    |
| LogBB | 0.20         |                |    |    |      |           |       |       |        |     |        |                    |                    |

IP = Isoelectric Point; RB = Number of rotatable bonds; HLB = hydrophilic-lipophilic balance; logS = water solubility; PL = polarizability( $\text{\AA}^3$ ); Minimal Projection Area ( $\text{\AA}^2$ ); MSA = molecular surface area; HBA = hydrogen bond acceptors; MR = Molar refractivity; ClogD = distribution at pH = 7.4; PSA = polar surface area; HBD = hydrogen bond donors; pKa = estimated acid strength; MPO = score for CNS penetration; LogBB = blood-brain distribution ( $0.152\text{ClogP} - 0.0148\text{PSA} + 0.138$ ); hERG = estimated pIC<sub>50</sub> (pAct) value for hERG (the human ether-a-go-go (hERG) ion channel); hERG<sub>AM</sub> = hERG activity model; hERG<sub>CM</sub> = hERG classification model.

| BBB Score Calculator |       |                |
|----------------------|-------|----------------|
| Property             | Value | T <sub>0</sub> |
| ARO_R_SCORE          | 3     | 0.69           |
| HA_SCORE             | 28    | 0.82           |
| HWHBN_SCORE          | 0.20  | 1.00           |
| TPSA_SCORE           | 55.40 | 0.61           |
| PKA_SCORE            | 8.81  | 1.00           |
| BBB_SCORE            |       | 4.74           |

ARO\_R\_SCORE = Number of aromatic rings; HA\_SCORE = Number of heavy atoms.  
MWHNM\_SCORE =  $[-0.5MW(HBA+HBD)]$  where MW = molecular weight, HBA = number of hydrogen bond acceptor sites, and HBD = number of hydrogen bond donors;  
TPSA = topological polar surface area; PKA\_SCORE = Acidity strength. Gupta, M.; Lee, H. J.; Barden, C. J.; Weaver, D. "The Blood-Brain Barrier (BBB) Score" J. Med. Chem. 2019, 62 (21), 9824-9836.

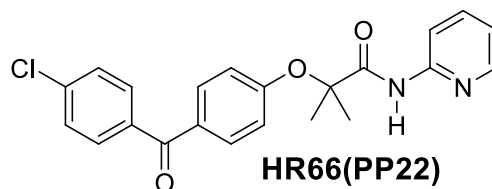

**HR66(PP22)**

| Calc. | MarvinSketch |      | IP   | RB | HLB  | logS      | PL    | MPA   | MSA    | HBA | MR     | hERG <sub>AM</sub> | hERG <sub>CM</sub> |
|-------|--------------|------|------|----|------|-----------|-------|-------|--------|-----|--------|--------------------|--------------------|
|       |              | T0   | 7.57 | 6  | 3.99 | -<br>6.45 | 41.78 | 49.64 | 543.63 | 7   | 109.63 | 5.19               | safe               |
| ClogP | 5.17         | 0.00 |      |    |      |           |       |       |        |     |        |                    |                    |
| ClogD | 5.17         | 0.00 |      |    |      |           |       |       |        |     |        |                    |                    |
| MW    | 394.86       | 0.75 |      |    |      |           |       |       |        |     |        |                    |                    |
| PSA   | 68.29        | 1.00 |      |    |      |           |       |       |        |     |        |                    |                    |
| HBD   | 1.00         | 0.75 |      |    |      |           |       |       |        |     |        |                    |                    |
| pKa   | 3.99         | 1.00 |      |    |      |           |       |       |        |     |        |                    |                    |
| MPO   | 3.50         |      |      |    |      |           |       |       |        |     |        |                    |                    |
| BBB   | 4.50         |      |      |    |      |           |       |       |        |     |        |                    |                    |
| LogBB | -0.09        |      |      |    |      |           |       |       |        |     |        |                    |                    |

IP = Isoelectric Point; RB = Number of rotatable bonds; HLB = hydrophilic-lipophilic balance; logS = water solubility; PL = polarizability( $\text{\AA}^3$ ); Minimal Projection Area ( $\text{\AA}^2$ ); MSA = molecular surface area; HBA = hydrogen bond acceptors; MR = Molar refractivity; ClogD = distribution at pKa; PSA = polar surface area; HBD = hydrogen bond donors; pKa = estimated acid strength; MPO = score for CNS penetration; LogBB = blood-brain distribution ( $0.152\text{ClogP} - 0.0148\text{PSA} + 0.138$ ); hERG = estimated pIC50 (pAct) value for hERG (the human ether-a-go-go (hERG) ion channel); hERG<sub>AM</sub> = hERG activity model; hERG<sub>CM</sub> = hERG classification model.

| BBB Score Calculator |       |                |
|----------------------|-------|----------------|
| Property             | Value | T <sub>0</sub> |
| ARO_R_SCORE          | 3     | 0.69           |
| HA_SCORE             | 28    | 0.82           |
| HWHBN_SCORE          | 0.25  | 0.96           |
| TPSA_SCORE           | 68.29 | 0.52           |
| PKA_SCORE            | 8.81  | 1.00           |
| BBB_SCORE            |       | 4.50           |

ARO\_R\_SCORE = Number of aromatic rings; HA\_SCORE = Number of heavy atoms.  
MWHNM\_SCORE =  $[-0.5MW(HBA+HBD)]$  where MW = molecular weight, HBA = number of hydrogen bond acceptor sites, and HBD = number of hydrogen bond donors;  
TPSA = topological polar surface area; PKA\_SCORE = Acidity strength. Gupta, M.; Lee, H. J.; Barden, C. J.; Weaver, D. "The Blood-Brain Barrier (BBB) Score" J. Med. Chem. 2019, 62 (21), 9824-9836.

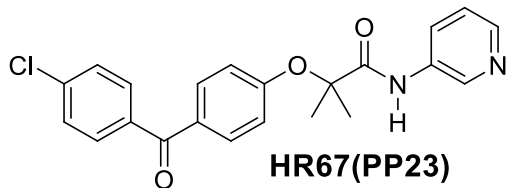

**HR67(PP23)**

| Calc. | MarvinSketch |      | IP   | RB | HLB  | logS | PL    | MPA   | MSA    | HBA | MR     | hERG <sub>AM</sub> | hERG <sub>CM</sub> |
|-------|--------------|------|------|----|------|------|-------|-------|--------|-----|--------|--------------------|--------------------|
|       |              | T0   | 8.39 | 6  | 4.54 | -    | 41.78 | 41.15 | 543.37 | 7   | 109.31 | 5.28               | safe               |
|       |              |      |      |    |      | 5.8  |       |       |        |     |        |                    |                    |
|       |              |      |      |    |      | 9    |       |       |        |     |        |                    |                    |
| ClogP | 4.58         | 0.21 |      |    |      |      |       |       |        |     |        |                    |                    |
| ClogD | 4.57         | 0.00 |      |    |      |      |       |       |        |     |        |                    |                    |
| MW    | 394.86       | 0.75 |      |    |      |      |       |       |        |     |        |                    |                    |
| PSA   | 68.29        | 1.00 |      |    |      |      |       |       |        |     |        |                    |                    |
| HBD   | 1.00         | 0.75 |      |    |      |      |       |       |        |     |        |                    |                    |
| pKa   | 4.37         | 1.00 |      |    |      |      |       |       |        |     |        |                    |                    |
| MPO   | 3.71         |      |      |    |      |      |       |       |        |     |        |                    |                    |
| BBB   | 4.50         |      |      |    |      |      |       |       |        |     |        |                    |                    |
| LogBB | -0.18        |      |      |    |      |      |       |       |        |     |        |                    |                    |

IP = Isoelectric Point; RB = Number of rotatable bonds; HLB = hydrophilic-lipophilic balance; logS = water solubility; PL = polarizability( $\text{\AA}^3$ ); Minimal Projection Area ( $\text{\AA}^2$ ); MSA = molecular surface area; HBA = hydrogen bond acceptors; MR = Molar refractivity; ClogD = distribution at pKa; PSA = polar surface area; HBD = hydrogen bond donors; pKa = estimated acid strength; MPO = score for CNS penetration; LogBB = blood-brain distribution ( $0.152\text{ClogP} - 0.0148\text{PSA} + 0.138$ ); hERG = estimated pIC<sub>50</sub> (pAct) value for hERG (the human ether-a-go-go (hERG) ion channel); hERG<sub>AM</sub> = hERG activity model; hERG<sub>CM</sub> = hERG classification model.

| BBB Score Calculator |       |                |
|----------------------|-------|----------------|
| Property             | Value | T <sub>0</sub> |
| ARO_R_SCORE          | 3     | 0.69           |
| HA_SCORE             | 28    | 0.82           |
| HWHBN_SCORE          | 0.25  | 0.96           |
| TPSA_SCORE           | 68.29 | 0.52           |
| PKA_SCORE            | 8.81  | 1.00           |
| BBB_SCORE            |       | 4.50           |

ARO\_R\_SCORE = Number of aromatic rings; HA\_SCORE = Number of heavy atoms.  
MWHNM\_SCORE =  $[-0.5MW(HBA+HBD)]$  where MW = molecular weight, HBA = number of hydrogen bond acceptor sites, and HBD = number of hydrogen bond donors;  
TPSA = topological polar surface area; PKA\_SCORE = Acidity strength. Gupta, M.; Lee, H. J.; Barden, C. J.; Weaver, D. "The Blood-Brain Barrier (BBB) Score" J. Med. Chem. 2019, 62 (21), 9824-9836.

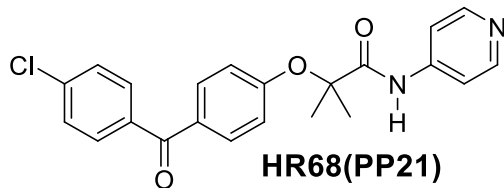

**HR68(PP21)**

| Calc. | MarvinSketch |      | IP   | RB | HLB  | logS      | PL    | MPA   | MSA    | HBA | MR     | hERG <sub>AM</sub> | hERG <sub>CM</sub> |
|-------|--------------|------|------|----|------|-----------|-------|-------|--------|-----|--------|--------------------|--------------------|
|       |              | T0   | 8.96 | 6  | 4.54 | -<br>5.89 | 41.78 | 44.70 | 453.10 | 7   | 109.31 | 5.28               | Safe               |
| ClogP | 4.58         | 0.21 |      |    |      |           |       |       |        |     |        |                    |                    |
| ClogD | 4.57         | 0.00 |      |    |      |           |       |       |        |     |        |                    |                    |
| MW    | 394.86       | 0.75 |      |    |      |           |       |       |        |     |        |                    |                    |
| PSA   | 68.29        | 1.00 |      |    |      |           |       |       |        |     |        |                    |                    |
| HBD   | 1.00         | 0.75 |      |    |      |           |       |       |        |     |        |                    |                    |
| pKa   | 4.85         | 1.00 |      |    |      |           |       |       |        |     |        |                    |                    |
| MPO   | 3.71         |      |      |    |      |           |       |       |        |     |        |                    |                    |
| BBB   | 4.50         |      |      |    |      |           |       |       |        |     |        |                    |                    |
| LogBB | -0.18        |      |      |    |      |           |       |       |        |     |        |                    |                    |

IP = Isoelectric Point; RB = Number of rotatable bonds; HLB = hydrophilic-lipophilic balance; logS = water solubility; PL = polarizability( $\text{\AA}^3$ ); Minimal Projection Area ( $\text{\AA}^2$ ); MSA = molecular surface area; HBA = hydrogen bond acceptors; MR = Molar refractivity; ClogD = distribution at pKa; PSA = polar surface area; HBD = hydrogen bond donors; pKa = estimated acid strength; MPO = score for CNS penetration; LogBB = blood-brain distribution ( $0.152\text{ClogP} - 0.0148\text{PSA} + 0.138$ ); hERG = estimated pIC<sub>50</sub> (pAct) value for hERG (the human ether-a-go-go (hERG) ion channel); hERG<sub>AM</sub> = hERG activity model; hERG<sub>CM</sub> = hERG classification model.

| BBB Score Calculator |       |                |
|----------------------|-------|----------------|
| Property             | Value | T <sub>0</sub> |
| ARO_R_SCORE          | 3     | 0.69           |
| HA_SCORE             | 28    | 0.82           |
| HWHBN_SCORE          | 0.25  | 0.96           |
| TPSA_SCORE           | 68.29 | 0.52           |
| PKA_SCORE            | 8.81  | 1.00           |
| BBB_SCORE            |       | 4.50           |

ARO\_R\_SCORE = Number of aromatic rings; HA\_SCORE = Number of heavy atoms.  
MWHNM\_SCORE =  $[-0.5MW(HBA+HBD)]$  where MW = molecular weight, HBA = number of hydrogen bond acceptor sites, and HBD = number of hydrogen bond donors;  
TPSA = topological polar surface area; PKA\_SCORE = Acidity strength. Gupta, M.; Lee, H. J.; Barden, C. J.; Weaver, D. "The Blood-Brain Barrier (BBB) Score" J. Med. Chem. 2019, 62 (21), 9824-9836.

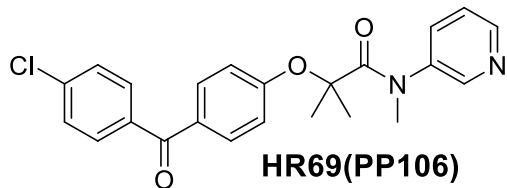

**HR69(PP106)**

| Calc. | MarvinSketch |      | IP | RB | HLB  | logS | PL    | MPA   | MSA    | HBA | MR     | hERG <sub>AM</sub> | hERG <sub>CM</sub> |
|-------|--------------|------|----|----|------|------|-------|-------|--------|-----|--------|--------------------|--------------------|
|       |              | T0   | NA | 6  | 4.69 | -    | 43.62 | 50.87 | 575.89 | 7   | 112.43 | 5.44               | safe               |
|       |              |      |    |    |      | 5.9  |       |       |        |     |        |                    |                    |
|       |              |      |    |    |      | 7    |       |       |        |     |        |                    |                    |
| ClogP | 4.44         | 0.28 |    |    |      |      |       |       |        |     |        |                    |                    |
| ClogD | 4.44         | 0.00 |    |    |      |      |       |       |        |     |        |                    |                    |
| MW    | 408.88       | 0.65 |    |    |      |      |       |       |        |     |        |                    |                    |
| PSA   | 59.50        | 1.00 |    |    |      |      |       |       |        |     |        |                    |                    |
| HBD   | 0.00         | 1.00 |    |    |      |      |       |       |        |     |        |                    |                    |
| pKa   | 4.33         | 1.00 |    |    |      |      |       |       |        |     |        |                    |                    |
| MPO   | 3.93         |      |    |    |      |      |       |       |        |     |        |                    |                    |
| BBB   | 4.65         |      |    |    |      |      |       |       |        |     |        |                    |                    |
| LogBB | -0.07        |      |    |    |      |      |       |       |        |     |        |                    |                    |

IP = Isoelectric Point; RB = Number of rotatable bonds; HLB = hydrophilic-lipophilic balance; logS = water solubility; PL = polarizability(Å<sup>3</sup>); Minimal Projection Area (Å<sup>2</sup>); MSA = molecular surface area; HBA = hydrogen bond acceptors; MR = Molar refractivity; ClogD = distribution at pKa; PSA = polar surface area; HBD = hydrogen bond donors; pKa = estimated acid strength; MPO = score for CNS penetration; LogBB = blood-brain distribution (0.152ClogP – 0.0148PSA + 0.138); hERG = estimated pIC50 (pAct) value for hERG (the human ether-a-go-go (hERG) ion channel); hERG<sub>AM</sub> = hERG activity model; hERG<sub>CM</sub> = hERG classification model.

| BBB Score Calculator |       |                |
|----------------------|-------|----------------|
| Property             | Value | T <sub>0</sub> |
| ARO_R_SCORE          | 3     | 0.69           |
| HA_SCORE             | 29    | 0.79           |
| HWHBN_SCORE          | 0.20  | 1.00           |
| TPSA_SCORE           | 59.50 | 0.58           |
| PKA_SCORE            | 8.81  | 1.00           |
| BBB_SCORE            |       | 4.65           |

ARO\_R\_SCORE = Number of aromatic rings; HA\_SCORE = Number of heavy atoms.  
MWHNM\_SCORE =  $[-0.5MW(HBA+HBD)]$  where MW = molecular weight, HBA = number of hydrogen bond acceptor sites, and HBD = number of hydrogen bond donors;  
TPSA = topological polar surface area; PKA\_SCORE = Acidity strength. Gupta, M.; Lee, H. J.; Barden, C. J.; Weaver, D. "The Blood-Brain Barrier (BBB) Score" J. Med. Chem. 2019, 62 (21), 9824-9836.

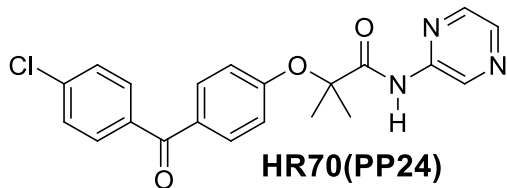

**HR70(PP24)**

| Calc. | MarvinSketch | IP   | RB | HLB  | logS      | PL    | MPA   | MSA    | HBA | MR     | hERG <sub>AM</sub> | hERG <sub>CM</sub> |
|-------|--------------|------|----|------|-----------|-------|-------|--------|-----|--------|--------------------|--------------------|
|       | T0           | 5.88 | 6  | 5.65 | -<br>5.27 | 40.90 | 44.62 | 536.59 | 8   | 107.47 | 5.18               | safe               |
| ClogP | 3.95         | 0.52 |    |      |           |       |       |        |     |        |                    |                    |
| ClogD | 3.95         | 0.02 |    |      |           |       |       |        |     |        |                    |                    |
| MW    | 395.84       | 0.74 |    |      |           |       |       |        |     |        |                    |                    |
| PSA   | 81.18        | 1.00 |    |      |           |       |       |        |     |        |                    |                    |
| HBD   | 1.00         | 7.25 |    |      |           |       |       |        |     |        |                    |                    |
| pKa   | 0.07         | 1.00 |    |      |           |       |       |        |     |        |                    |                    |
| MPO   | 4.04         |      |    |      |           |       |       |        |     |        |                    |                    |
| BBB   | 4.14         |      |    |      |           |       |       |        |     |        |                    |                    |
| LogBB | -0.46        |      |    |      |           |       |       |        |     |        |                    |                    |

IP = Isoelectric Point; RB = Number of rotatable bonds; HLB = hydrophilic-lipophilic balance; logS = water solubility; PL = polarizability( $\text{\AA}^3$ ); Minimal Projection Area ( $\text{\AA}^2$ ); MSA = molecular surface area; HBA = hydrogen bond acceptors; MR = Molar refractivity; ClogD = distribution at pKa; PSA = polar surface area; HBD = hydrogen bond donors; pKa = estimated acid strength; MPO = score for CNS penetration; LogBB = blood-brain distribution ( $0.152\text{ClogP} - 0.0148\text{PSA} + 0.138$ ); hERG = estimated pIC<sub>50</sub> (pAct) value for hERG (the human ether-a-go-go (hERG) ion channel); hERG<sub>AM</sub> = hERG activity model; hERG<sub>CM</sub> = hERG classification model.

| BBB Score Calculator |       |                |
|----------------------|-------|----------------|
| Property             | Value | T <sub>0</sub> |
| ARO_R_SCORE          | 3.00  | 0.69           |
| HA_SCORE             | 28.00 | 0.82           |
| HWHBN_SCORE          | 0.30  | 0.84           |
| TPSA_SCORE           | 81.18 | 0.43           |
| PKA_SCORE            | 8.81  | 1.00           |
| BBB_SCORE            |       | 4.14           |

ARO\_R\_SCORE = Number of aromatic rings; HA\_SCORE = Number of heavy atoms.  
MWHNM\_SCORE =  $[-0.5MW(HBA+HBD)]$  where MW = molecular weight, HBA = number of hydrogen bond acceptor sites, and HBD = number of hydrogen bond donors;  
TPSA = topological polar surface area; PKA\_SCORE = Acidity strength. Gupta, M.; Lee, H. J.; Barden, C. J.; Weaver, D. "The Blood-Brain Barrier (BBB) Score" J. Med. Chem. 2019, 62 (21), 9824-9836.

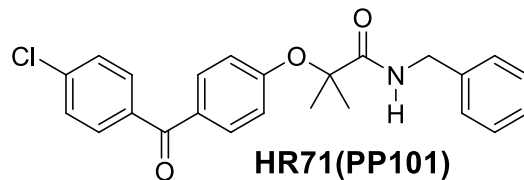

| Calc. | MarvinSketch |      | IP | RB | HLB  | logS          | PL    | MPA   | MSA    | HBA | MR     | hERG <sub>AM</sub> | hERG <sub>CM</sub> |
|-------|--------------|------|----|----|------|---------------|-------|-------|--------|-----|--------|--------------------|--------------------|
|       |              | T0   | NA | 7  | 3.80 | -<br>6.9<br>2 | 44.52 | 49.64 | 582.41 | 6   | 114.52 | 5.34               | safe               |
| ClogP | 5.50         | 0.00 |    |    |      |               |       |       |        |     |        |                    |                    |
| ClogD | 5.50         | 0.00 |    |    |      |               |       |       |        |     |        |                    |                    |
| MW    | 407.89       | 0.66 |    |    |      |               |       |       |        |     |        |                    |                    |
| PSA   | 55.40        | 1.00 |    |    |      |               |       |       |        |     |        |                    |                    |
| HBD   | 1.00         | 0.75 |    |    |      |               |       |       |        |     |        |                    |                    |
| pKa   | 2.70         | 1.00 |    |    |      |               |       |       |        |     |        |                    |                    |
| MPO   | 3.41         |      |    |    |      |               |       |       |        |     |        |                    |                    |
| BBB   | 4.70         |      |    |    |      |               |       |       |        |     |        |                    |                    |
| LogBB | 0.15         |      |    |    |      |               |       |       |        |     |        |                    |                    |

IP = Isoelectric Point; RB = Number of rotatable bonds; HLB = hydrophilic-lipophilic balance; logS = water solubility; PL = polarizability( $\text{\AA}^3$ ); Minimal Projection Area ( $\text{\AA}^2$ ); MSA = molecular surface area; HBA = hydrogen bond acceptors; MR = Molar refractivity; ClogD = distribution at pKa; PSA = polar surface area; HBD = hydrogen bond donors; pKa = estimated acid strength; MPO = score for CNS penetration; LogBB = blood-brain distribution ( $0.152\text{ClogP} - 0.0148\text{PSA} + 0.138$ ); hERG = estimated pIC50 (pAct) value for hERG (the human ether-a-go-go (hERG) ion channel); hERG<sub>AM</sub> = hERG activity model; hERG<sub>CM</sub> = hERG classification model.

| BBB Score Calculator |       |                |
|----------------------|-------|----------------|
| Property             | Value | T <sub>0</sub> |
| ARO_R_SCORE          | 3     | 0.69           |
| HA_SCORE             | 29.00 | 0.79           |
| HWHBN_SCORE          | 0.20  | 1.00           |
| TPSA_SCORE           | 55.40 | 0.61           |
| PKA_SCORE            | 8.81  | 1.00           |
| BBB_SCORE            |       | 4.70           |

ARO\_R\_SCORE = Number of aromatic rings; HA\_SCORE = Number of heavy atoms.  
MWHNM\_SCORE =  $[-0.5MW(HBA+HBD)]$  where MW = molecular weight, HBA = number of hydrogen bond acceptor sites, and HBD = number of hydrogen bond donors;  
TPSA = topological polar surface area; PKA\_SCORE = Acidity strength. Gupta, M.; Lee, H. J.; Barden, C. J.; Weaver, D. "The Blood-Brain Barrier (BBB) Score" J. Med. Chem. 2019, 62 (21), 9824-9836.

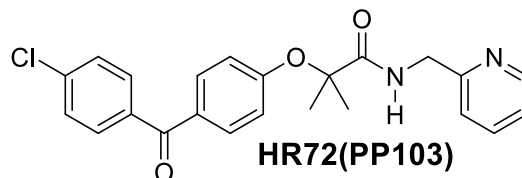

| Calc. | MarvinSketch | IP   | RB | HLB  | logS      | PL    | MPA   | MSA    | HBA | MR     | hERG <sub>AM</sub> | hERG <sub>CM</sub> |
|-------|--------------|------|----|------|-----------|-------|-------|--------|-----|--------|--------------------|--------------------|
|       | T0           | 8.23 | 7  | 5.41 | -<br>5.97 | 43.63 | 53.16 | 575.97 | 4   | 111.85 | 5.28               | safe               |
| ClogP | 4.36         | 0.32 |    |      |           |       |       |        |     |        |                    |                    |
| ClogD | 4.36         | 0.00 |    |      |           |       |       |        |     |        |                    |                    |
| MW    | 408.88       | 0.65 |    |      |           |       |       |        |     |        |                    |                    |
| PSA   | 68.29        | 1.00 |    |      |           |       |       |        |     |        |                    |                    |
| HBD   | 1.00         | 0.75 |    |      |           |       |       |        |     |        |                    |                    |
| pKa   | 4.16         | 1.00 |    |      |           |       |       |        |     |        |                    |                    |
| MPO   | 3.72         |      |    |      |           |       |       |        |     |        |                    |                    |
| BBB   | 4.47         |      |    |      |           |       |       |        |     |        |                    |                    |
| LogBB | -0.21        |      |    |      |           |       |       |        |     |        |                    |                    |

IP = Isoelectric Point; RB = Number of rotatable bonds; HLB = hydrophilic-lipophilic balance; logS = water solubility; PL = polarizability( $\text{\AA}^3$ ); Minimal Projection Area ( $\text{\AA}^2$ ); MSA = molecular surface area; HBA = hydrogen bond acceptors; MR = Molar refractivity; ClogD = distribution at pKa; PSA = polar surface area; HBD = hydrogen bond donors; pKa = estimated acid strength; MPO = score for CNS penetration; LogBB = blood-brain distribution ( $0.152\text{ClogP} - 0.0148\text{PSA} + 0.138$ ); hERG = estimated pIC50 (pAct) value for hERG (the human ether-a-go-go (hERG) ion channel); hERG<sub>AM</sub> = hERG activity model; hERG<sub>CM</sub> = hERG classification model.

| BBB Score Calculator |       |                |
|----------------------|-------|----------------|
| Property             | Value | T <sub>0</sub> |
| ARO_R_SCORE          | 3     | 0.69           |
| HA_SCORE             | 29    | 0.79           |
| HWHBN_SCORE          | 0.25  | 0.96           |
| TPSA_SCORE           | 68.29 | 0.52           |
| PKA_SCORE            | 8.81  | 1.00           |
| BBB_SCORE            |       | 4.47           |

ARO\_R\_SCORE = Number of aromatic rings; HA\_SCORE = Number of heavy atoms.  
MWHNM\_SCORE =  $[-0.5MW(HBA+HBD)]$  where MW = molecular weight, HBA = number of hydrogen bond acceptor sites, and HBD = number of hydrogen bond donors;  
TPSA = topological polar surface area; PKA\_SCORE = Acidity strength. Gupta, M.; Lee, H. J.; Barden, C. J.; Weaver, D. "The Blood-Brain Barrier (BBB) Score" J. Med. Chem. 2019, 62 (21), 9824-9836.

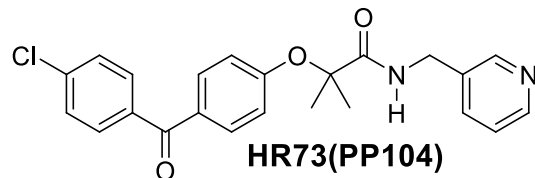

| Calc. | MarvinSketch |      | IP   | RB | HLB  | logS      | PL    | MPA   | MSA    | HBA | MR     | hERG <sub>AM</sub> | hERG <sub>CM</sub> |
|-------|--------------|------|------|----|------|-----------|-------|-------|--------|-----|--------|--------------------|--------------------|
|       |              | T0   | 8.87 | 7  | 5.43 | -<br>5.74 | 43.63 | 51.36 | 575.34 | 7   | 112.37 | 5.24               | safe               |
| ClogP | 4.28         | 0.36 |      |    |      |           |       |       |        |     |        |                    |                    |
| ClogD | 4.28         | 0.00 |      |    |      |           |       |       |        |     |        |                    |                    |
| MW    | 408.88       | 0.65 |      |    |      |           |       |       |        |     |        |                    |                    |
| PSA   | 68.29        | 1.00 |      |    |      |           |       |       |        |     |        |                    |                    |
| HBD   | 1.00         | 0.75 |      |    |      |           |       |       |        |     |        |                    |                    |
| pKa   | 4.82         | 1.00 |      |    |      |           |       |       |        |     |        |                    |                    |
| MPO   | 3.76         |      |      |    |      |           |       |       |        |     |        |                    |                    |
| BBB   | 4.47         |      |      |    |      |           |       |       |        |     |        |                    |                    |
| LogBB | -0.22        |      |      |    |      |           |       |       |        |     |        |                    |                    |

IP = Isoelectric Point; RB = Number of rotatable bonds; HLB = hydrophilic-lipophilic balance; logS = water solubility; PL = polarizability( $\text{\AA}^3$ ); Minimal Projection Area ( $\text{\AA}^2$ ); MSA = molecular surface area; HBA = hydrogen bond acceptors; MR = Molar refractivity; ClogD = distribution at pKa; PSA = polar surface area; HBD = hydrogen bond donors; pKa = estimated acid strength; MPO = score for CNS penetration; LogBB = blood-brain distribution ( $0.152\text{ClogP} - 0.0148\text{PSA} + 0.138$ ); hERG = estimated pIC50 (pAct) value for hERG (the human ether-a-go-go (hERG) ion channel); hERG<sub>AM</sub> = hERG activity model; hERG<sub>CM</sub> = hERG classification model.

| BBB Score Calculator |       |                |
|----------------------|-------|----------------|
| Property             | Value | T <sub>0</sub> |
| ARO_R_SCORE          | 3     | 0.69           |
| HA_SCORE             | 29    | 0.79           |
| HWHBN_SCORE          | 0.25  | 0.96           |
| TPSA_SCORE           | 68.29 | 0.52           |
| PKA_SCORE            | 8.81  | 1.00           |
| BBB_SCORE            |       | 4.47           |

ARO\_R\_SCORE = Number of aromatic rings; HA\_SCORE = Number of heavy atoms.  
MWHNM\_SCORE =  $[-0.5MW(HBA+HBD)]$  where MW = molecular weight, HBA = number of hydrogen bond acceptor sites, and HBD = number of hydrogen bond donors;  
TPSA = topological polar surface area; PKA\_SCORE = Acidity strength. Gupta, M.; Lee, H. J.; Barden, C. J.; Weaver, D. "The Blood-Brain Barrier (BBB) Score" J. Med. Chem. 2019, 62 (21), 9824-9836.

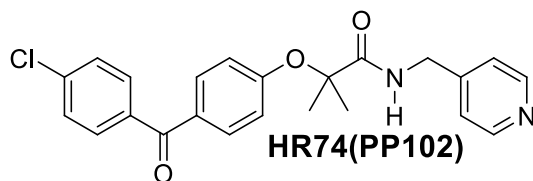

| Calc. | MarvinSketch |      | IP   | RB | HLB  | logS      | PL    | MPA   | MSA    | HBA | MR     | hERG <sub>AM</sub> | hERG <sub>CM</sub> |
|-------|--------------|------|------|----|------|-----------|-------|-------|--------|-----|--------|--------------------|--------------------|
|       |              | T0   | 8.99 | 7  | 5.43 | -<br>5.74 | 43.63 | 51.47 | 575.38 | 7   | 112.37 | 5.27               | safe               |
| ClogP | 4.28         | 0.36 |      |    |      |           |       |       |        |     |        |                    |                    |
| ClogD | 4.28         | 0.00 |      |    |      |           |       |       |        |     |        |                    |                    |
| MW    | 408.88       | 0.65 |      |    |      |           |       |       |        |     |        |                    |                    |
| PSA   | 68.29        | 1.00 |      |    |      |           |       |       |        |     |        |                    |                    |
| HBD   | 1.00         | 0.75 |      |    |      |           |       |       |        |     |        |                    |                    |
| pKa   | 5.02         | 1.00 |      |    |      |           |       |       |        |     |        |                    |                    |
| MPO   | 3.76         |      |      |    |      |           |       |       |        |     |        |                    |                    |
| BBB   | 4.14         |      |      |    |      |           |       |       |        |     |        |                    |                    |
| LogBB | -0.22        |      |      |    |      |           |       |       |        |     |        |                    |                    |

IP = Isoelectric Point; RB = Number of rotatable bonds; HLB = hydrophilic-lipophilic balance; logS = water solubility; PL = polarizability( $\text{\AA}^3$ ); Minimal Projection Area ( $\text{\AA}^2$ ); MSA = molecular surface area; HBA = hydrogen bond acceptors; MR = Molar refractivity; ClogD = distribution at pKa; PSA = polar surface area; HBD = hydrogen bond donors; pKa = estimated acid strength; MPO = score for CNS penetration; LogBB = blood-brain distribution ( $0.152\text{ClogP} - 0.0148\text{PSA} + 0.138$ ); hERG = estimated pIC50 (pAct) value for hERG (the human ether-a-go-go (hERG) ion channel); hERG<sub>AM</sub> = hERG activity model; hERG<sub>CM</sub> = hERG classification model

| BBB Score Calculator |       |                |
|----------------------|-------|----------------|
| Property             | Value | T <sub>0</sub> |
| ARO_R_SCORE          | 3     | 0.69           |
| HA_SCORE             | 29    | 0.79           |
| HWHBN_SCORE          | 0.25  | 0.96           |
| TPSA_SCORE           | 68.29 | 0.52           |
| PKA_SCORE            | 5.02  | 0.34           |
| BBB_SCORE            |       | 4.14           |

ARO\_R\_SCORE = Number of aromatic rings; HA\_SCORE = Number of heavy atoms.  
MWHNM\_SCORE =  $[-0.5MW(HBA+HBD)]$  where MW = molecular weight, HBA = number of hydrogen bond acceptor sites, and HBD = number of hydrogen bond donors;  
TPSA = topological polar surface area; PKA\_SCORE = Acidity strength. Gupta, M.; Lee, H. J.; Barden, C. J.; Weaver, D. "The Blood-Brain Barrier (BBB) Score" J. Med. Chem. 2019, 62 (21), 9824-9836.

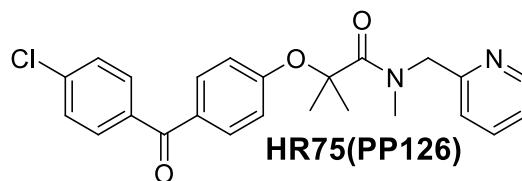

**HR75(PP126)**

| Calc. | MarvinSketch |      | IP | RB | HLB  | logS      | PL    | MPA   | MSA    | HBA | MR     | hERG <sub>AM</sub> | hERG <sub>CM</sub> |
|-------|--------------|------|----|----|------|-----------|-------|-------|--------|-----|--------|--------------------|--------------------|
|       |              | T0   | NA | 7  | 5.56 | -<br>5.91 | 45.47 | 57.15 | 608.71 | 7   | 116.74 | 5.35               | safe               |
| ClogP | 4.59         | 0.21 |    |    |      |           |       |       |        |     |        |                    |                    |
| ClogD | 4.59         | 0.00 |    |    |      |           |       |       |        |     |        |                    |                    |
| MW    | 422.91       | 0.55 |    |    |      |           |       |       |        |     |        |                    |                    |
| PSA   | 59.50        | 1.00 |    |    |      |           |       |       |        |     |        |                    |                    |
| HBD   | 0.00         | 1.00 |    |    |      |           |       |       |        |     |        |                    |                    |
| pKa   | 4.21         | 1.00 |    |    |      |           |       |       |        |     |        |                    |                    |
| MPO   | 3.76         |      |    |    |      |           |       |       |        |     |        |                    |                    |
| BBB   | 4.60         |      |    |    |      |           |       |       |        |     |        |                    |                    |
| LogBB | -0.04        |      |    |    |      |           |       |       |        |     |        |                    |                    |

IP = Isoelectric Point; RB = Number of rotatable bonds; HLB = hydrophilic-lipophilic balance; logS = water solubility; PL = polarizability( $\text{\AA}^3$ ); Minimal Projection Area ( $\text{\AA}^2$ ); MSA = molecular surface area; HBA = hydrogen bond acceptors; MR = Molar refractivity; ClogD = distribution at pKa; PSA = polar surface area; HBD = hydrogen bond donors; pKa = estimated acid strength; MPO = score for CNS penetration; LogBB = blood-brain distribution ( $0.152\text{ClogP} - 0.0148\text{PSA} + 0.138$ ); hERG = estimated pIC50 (pAct) value for hERG (the human ether-a-go-go (hERG) ion channel); hERG<sub>AM</sub> = hERG activity model; hERG<sub>CM</sub> = hERG classification model.

| BBB Score Calculator |       |                |
|----------------------|-------|----------------|
| Property             | Value | T <sub>0</sub> |
| ARO_R_SCORE          | 3     | 0.69           |
| HA_SCORE             | 30    | 0.75           |
| HWHBN_SCORE          | 0.19  | 1.00           |
| TPSA_SCORE           | 59.50 | 0.58           |
| PKA_SCORE            | 8.81  | 1.00           |
| BBB_SCORE            |       | 4.60           |

ARO\_R\_SCORE = Number of aromatic rings; HA\_SCORE = Number of heavy atoms.  
MWHNM\_SCORE =  $[-0.5MW(HBA+HBD)]$  where MW = molecular weight, HBA = number of hydrogen bond acceptor sites, and HBD = number of hydrogen bond donors;  
TPSA = topological polar surface area; PKA\_SCORE = Acidity strength. Gupta, M.; Lee, H. J.; Barden, C. J.; Weaver, D. "The Blood-Brain Barrier (BBB) Score" J. Med. Chem. 2019, 62 (21), 9824-9836.

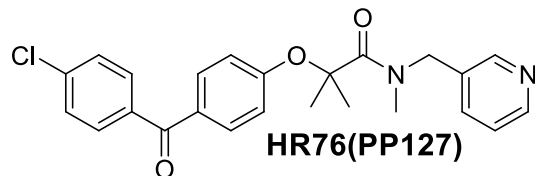

**HR76(PP127)**

| Calc. | MarvinSketch |      | IP | RB | HLB  | logS      | PL    | MPA   | MSA    | HBA | MR     | hERG <sub>AM</sub> | hERG <sub>CM</sub> |
|-------|--------------|------|----|----|------|-----------|-------|-------|--------|-----|--------|--------------------|--------------------|
|       |              | T0   | NA | 7  | 5.58 | -<br>5.77 | 45.47 | 57.81 | 608.06 | 7   | 117.26 | 5.41               | safe               |
| ClogP | 4.51         | 0.25 |    |    |      |           |       |       |        |     |        |                    |                    |
| ClogD | 4.50         | 0.00 |    |    |      |           |       |       |        |     |        |                    |                    |
| MW    | 422.91       | 0.55 |    |    |      |           |       |       |        |     |        |                    |                    |
| PSA   | 59.50        | 1.00 |    |    |      |           |       |       |        |     |        |                    |                    |
| HBD   | 0.00         | 1.00 |    |    |      |           |       |       |        |     |        |                    |                    |
| pKa   | 4.83         | 1.00 |    |    |      |           |       |       |        |     |        |                    |                    |
| MPO   | 3.80         |      |    |    |      |           |       |       |        |     |        |                    |                    |
| BBB   | 4.60         |      |    |    |      |           |       |       |        |     |        |                    |                    |
| LogBB | -0.06        |      |    |    |      |           |       |       |        |     |        |                    |                    |

IP = Isoelectronic Point; RB = Number of rotatable bonds; HLB = hydrophilic-lipophilic balance; logS = water solubility; PL = polarizability( $\text{\AA}^3$ ); Minimal Projection Area ( $\text{\AA}^2$ ); MSA = molecular surface area; HBA = hydrogen bond acceptors; MR = Molar refractivity; ClogD = distribution at pKa; PSA = polar surface area; HBD = hydrogen bond donors; pKa = estimated acid strength; MPO = score for CNS penetration; LogBB = blood-brain distribution ( $0.152\text{ClogP} - 0.0148\text{PSA} + 0.138$ ); hERG = estimated pIC50 (pAct) value for hERG (the human ether-a-go-go (hERG) ion channel); hERG<sub>AM</sub> = hERG activity model; hERG<sub>CM</sub> = hERG classification model.

| BBB Score Calculator |       |                |
|----------------------|-------|----------------|
| Property             | Value | T <sub>0</sub> |
| ARO_R_SCORE          | 3     | 0.69           |
| HA_SCORE             | 30    | 0.75           |
| HWHBN_SCORE          | 0.19  | 1.00           |
| TPSA_SCORE           | 59.50 | 0.58           |
| PKA_SCORE            | 8.81  | 1.00           |
| BBB_SCORE            |       | 4.60           |

ARO\_R\_SCORE = Number of aromatic rings; HA\_SCORE = Number of heavy atoms.  
MWHNM\_SCORE =  $[-0.5MW(HBA+HBD)]$  where MW = molecular weight, HBA = number of hydrogen bond acceptor sites, and HBD = number of hydrogen bond donors;  
TPSA = topological polar surface area; PKA\_SCORE = Acidity strength. Gupta, M.; Lee, H. J.; Barden, C. J.; Weaver, D. "The Blood-Brain Barrier (BBB) Score" J. Med. Chem. 2019, 62 (21), 9824-9836.

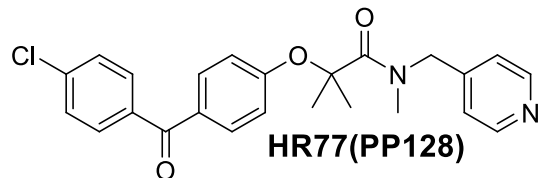

| Calc. | MarvinSketch |      | IP | RB | HLB  | logS      | PL    | MPA   | MSA    | HBA | MR     | hERG <sub>AM</sub> | hERG <sub>CM</sub> |
|-------|--------------|------|----|----|------|-----------|-------|-------|--------|-----|--------|--------------------|--------------------|
|       |              | T0   | NA | 7  | 5.58 | -<br>5.77 | 45.47 | 56.93 | 608.63 | 7   | 117.26 | 5.42               | safe               |
| ClogP | 4.51         | 0.25 |    |    |      |           |       |       |        |     |        |                    |                    |
| ClogD | 4.50         | 0.00 |    |    |      |           |       |       |        |     |        |                    |                    |
| MW    | 422.91       | 0.55 |    |    |      |           |       |       |        |     |        |                    |                    |
| PSA   | 59.50        | 1.00 |    |    |      |           |       |       |        |     |        |                    |                    |
| HBD   | 0.00         | 1.00 |    |    |      |           |       |       |        |     |        |                    |                    |
| pKa   | 5.03         | 1.00 |    |    |      |           |       |       |        |     |        |                    |                    |
| MPO   | 3.80         |      |    |    |      |           |       |       |        |     |        |                    |                    |
| BBB   | 4.27         |      |    |    |      |           |       |       |        |     |        |                    |                    |
| LogBB | -0.06        |      |    |    |      |           |       |       |        |     |        |                    |                    |

IP = Isoelectric Point; RB = Number of rotatable bonds; HLB = hydrophilic-lipophilic balance; logS = water solubility; PL = polarizability(Å<sup>3</sup>); Minimal Projection Area (Å<sup>2</sup>); MSA = molecular surface area; HBA = hydrogen bond acceptors; MR = Molar refractivity; ClogD = distribution at pKa; PSA = polar surface area; HBD = hydrogen bond donors; pKa = estimated acid strength; MPO = score for CNS penetration; LogBB = blood-brain distribution (0.152ClogP – 0.0148PSA + 0.138); hERG = estimated pIC<sub>50</sub> (pAct) value for hERG (the human ether-a-go-go (hERG) ion channel); hERG<sub>AM</sub> = hERG activity model; hERG<sub>CM</sub> = hERG classification model.

| BBB Score Calculator |       |                |
|----------------------|-------|----------------|
| Property             | Value | T <sub>0</sub> |
| ARO_R_SCORE          | 3     | 0.69           |
| HA_SCORE             | 30    | 0.75           |
| HWHBN_SCORE          | 0.19  | 1.00           |
| TPSA_SCORE           | 59.50 | 0.58           |
| PKA_SCORE            | 5.03  | 0.34           |
| BBB_SCORE            |       | 4.27           |

ARO\_R\_SCORE = Number of aromatic rings; HA\_SCORE = Number of heavy atoms.  
MWHNM\_SCORE =  $[-0.5MW(HBA+HBD)]$  where MW = molecular weight, HBA = number of hydrogen bond acceptor sites, and HBD = number of hydrogen bond donors;  
TPSA = topological polar surface area; PKA\_SCORE = Acidity strength. Gupta, M.; Lee, H. J.; Barden, C. J.; Weaver, D. "The Blood-Brain Barrier (BBB) Score" J. Med. Chem. 2019, 62 (21), 9824-9836.

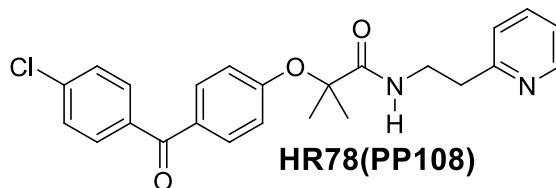

**HR78(PP108)**

| Calc. | MarvinSketch | IP   | RB | HLB  | logS      | PL    | MPA   | MSA    | HBA | MR     | hERG <sub>AM</sub> | hERG <sub>CM</sub> |
|-------|--------------|------|----|------|-----------|-------|-------|--------|-----|--------|--------------------|--------------------|
|       | T0           | 9.50 | 8  | 5.01 | -<br>5.97 | 45.47 | 48.71 | 606.38 | 7   | 116.55 | 5.34               | Safe               |
| ClogP | 4.60         | 0.20 |    |      |           |       |       |        |     |        |                    |                    |
| ClogD | 4.60         | 0.00 |    |      |           |       |       |        |     |        |                    |                    |
| MW    | 422.91       | 0.55 |    |      |           |       |       |        |     |        |                    |                    |
| PSA   | 68.29        | 1.00 |    |      |           |       |       |        |     |        |                    |                    |
| HBD   | 1.00         | 0.75 |    |      |           |       |       |        |     |        |                    |                    |
| pKa   | 4.55         | 1.00 |    |      |           |       |       |        |     |        |                    |                    |
| MPO   | 3.50         |      |    |      |           |       |       |        |     |        |                    |                    |
| BBB   | 4.44         |      |    |      |           |       |       |        |     |        |                    |                    |
| LogBB | -0.17        |      |    |      |           |       |       |        |     |        |                    |                    |

IP = Isoelectric Point; RB = Number of rotatable bonds; HLB = hydrophilic-lipophilic balance; logS = water solubility; PL = polarizability( $\text{\AA}^3$ ); Minimal Projection Area ( $\text{\AA}^2$ ); MSA = molecular surface area; HBA = hydrogen bond acceptors; MR = Molar refractivity; ClogD = distribution at pKa; PSA = polar surface area; HBD = hydrogen bond donors; pKa = estimated acid strength; MPO = score for CNS penetration; LogBB = blood-brain distribution ( $0.152\text{ClogP} - 0.0148\text{PSA} + 0.138$ ); hERG = estimated pIC50 (pAct) value for hERG (the human ether-a-go-go (hERG) ion channel); hERG<sub>AM</sub> = hERG activity model; hERG<sub>CM</sub> = hERG classification model.

| BBB Score Calculator |       |                |
|----------------------|-------|----------------|
| Property             | Value | T <sub>0</sub> |
| ARO_R_SCORE          | 3     | 0.69           |
| HA_SCORE             | 30    | 0.75           |
| HWHBN_SCORE          | 0.24  | 0.97           |
| TPSA_SCORE           | 68.29 | 0.52           |
| PKA_SCORE            | 8.81  | 1.00           |
| BBB_SCORE            |       | 4.44           |

ARO\_R\_SCORE = Number of aromatic rings; HA\_SCORE = Number of heavy atoms.  
MWHNM\_SCORE =  $[-0.5MW(HBA+HBD)]$  where MW = molecular weight, HBA = number of hydrogen bond acceptor sites, and HBD = number of hydrogen bond donors;  
TPSA = topological polar surface area; PKA\_SCORE = Acidity strength. Gupta, M.; Lee, H. J.; Barden, C. J.; Weaver, D. "The Blood-Brain Barrier (BBB) Score" J. Med. Chem. 2019, 62 (21), 9824-9836.

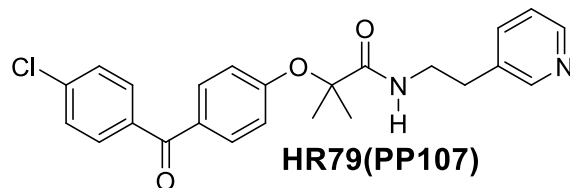

| Calc. | MarvinSketch |      | IP   | RB | HLB  | logS  | PL    | MPA   | MSA    | HBA | MR     | hERG <sub>AM</sub> | hERG <sub>CM</sub> |
|-------|--------------|------|------|----|------|-------|-------|-------|--------|-----|--------|--------------------|--------------------|
|       |              | T0   | 9.68 | 8  | 5.03 | -5.74 | 45.47 | 46.89 | 605.78 | 7   | 117.12 | 5.39               | safe               |
| ClogP | 4.57         | 0.21 |      |    |      |       |       |       |        |     |        |                    |                    |
| ClogD | 4.57         | 0.00 |      |    |      |       |       |       |        |     |        |                    |                    |
| MW    | 422.91       | 0.55 |      |    |      |       |       |       |        |     |        |                    |                    |
| PSA   | 68.29        | 1.00 |      |    |      |       |       |       |        |     |        |                    |                    |
| HBD   | 1.00         | 0.75 |      |    |      |       |       |       |        |     |        |                    |                    |
| pKa   | 4.93         | 1.00 |      |    |      |       |       |       |        |     |        |                    |                    |
| MPO   | 3.52         |      |      |    |      |       |       |       |        |     |        |                    |                    |
| BBB   | 4.44         |      |      |    |      |       |       |       |        |     |        |                    |                    |
| LogBB | -0.18        |      |      |    |      |       |       |       |        |     |        |                    |                    |

IP = Isoelectric Point; RB = Number of rotatable bonds; HLB = hydrophilic-lipophilic balance; logS = water solubility; PL = polarizability( $\text{\AA}^3$ ); Minimal Projection Area ( $\text{\AA}^2$ ); MSA = molecular surface area; HBA = hydrogen bond acceptors; MR = Molar refractivity; ClogD = distribution at pKa; PSA = polar surface area; HBD = hydrogen bond donors; pKa = estimated acid strength; MPO = score for CNS penetration; LogBB = blood-brain distribution ( $0.152\text{ClogP} - 0.0148\text{PSA} + 0.138$ ); hERG = estimated pIC50 (pAct) value for hERG (the human ether-a-go-go (hERG) ion channel); hERG<sub>AM</sub> = hERG activity model; hERG<sub>CM</sub> = hERG classification model.

| BBB Score Calculator |       |                |
|----------------------|-------|----------------|
| Property             | Value | T <sub>0</sub> |
| ARO_R_SCORE          | 3     | 0.69           |
| HA_SCORE             | 30    | 0.75           |
| HWHBN_SCORE          | 0.24  | 0.97           |
| TPSA_SCORE           | 68.29 | 0.52           |
| PKA_SCORE            | 8.81  | 1.00           |
| BBB_SCORE            |       | 4.44           |

ARO\_R\_SCORE = Number of aromatic rings; HA\_SCORE = Number of heavy atoms.  
MWHNM\_SCORE =  $[-0.5MW(HBA+HBD)]$  where MW = molecular weight, HBA = number of hydrogen bond acceptor sites, and HBD = number of hydrogen bond donors;  
TPSA = topological polar surface area; PKA\_SCORE = Acidity strength. Gupta, M.; Lee, H. J.; Barden, C. J.; Weaver, D. "The Blood-Brain Barrier (BBB) Score" J. Med. Chem. 2019, 62 (21), 9824-9836.

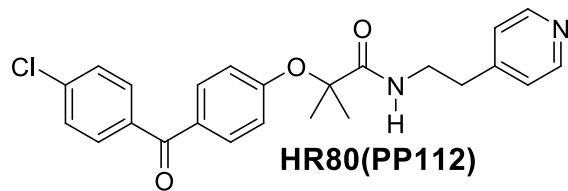

| Calc. | MarvinSketch |      | IP   | RB | HLB  | logS          | PL    | MPA   | MSA    | HBA | MR     | hERG <sub>AM</sub> | hERG <sub>CM</sub> |
|-------|--------------|------|------|----|------|---------------|-------|-------|--------|-----|--------|--------------------|--------------------|
|       |              | T0   | 9.75 | 8  | 5.03 | -<br>5.7<br>4 | 45.47 | 49.21 | 605.22 | 7   | 117.12 | 5.45               | TOXIC              |
| ClogP | 4.57         | 0.21 |      |    |      |               |       |       |        |     |        |                    |                    |
| ClogD | 4.57         | 0.00 |      |    |      |               |       |       |        |     |        |                    |                    |
| MW    | 422.91       | 0.55 |      |    |      |               |       |       |        |     |        |                    |                    |
| PSA   | 68.29        | 1.00 |      |    |      |               |       |       |        |     |        |                    |                    |
| HBD   | 1.00         | 0.75 |      |    |      |               |       |       |        |     |        |                    |                    |
| pKa   | 5.05         | 1.00 |      |    |      |               |       |       |        |     |        |                    |                    |
| MPO   | 3.52         |      |      |    |      |               |       |       |        |     |        |                    |                    |
| BBB   | 4.11         |      |      |    |      |               |       |       |        |     |        |                    |                    |
| LogBB | -0.18        |      |      |    |      |               |       |       |        |     |        |                    |                    |

IP = Isoelectric Point; RB = Number of rotatable bonds; HLB = hydrophilic-lipophilic balance; logS = water solubility; PL = polarizability( $\text{\AA}^3$ ); Minimal Projection Area ( $\text{\AA}^2$ ); MSA = molecular surface area; HBA = hydrogen bond acceptors; MR = Molar refractivity; ClogD = distribution at pKa; PSA = polar surface area; HBD = hydrogen bond donors; pKa = estimated acid strength; MPO = score for CNS penetration; LogBB = blood-brain distribution ( $0.152\text{ClogP} - 0.0148\text{PSA} + 0.138$ ); hERG = estimated pIC<sub>50</sub> (pAct) value for hERG (the human ether-a-go-go (hERG) ion channel); hERG<sub>AM</sub> = hERG activity model; hERG<sub>CM</sub> = hERG classification model.

| BBB Score Calculator |       |                |
|----------------------|-------|----------------|
| Property             | Value | T <sub>0</sub> |
| ARO_R_SCORE          | 3     | 0.69           |
| HA_SCORE             | 30    | 0.75           |
| HWHBN_SCORE          | 0.24  | 0.97           |
| TPSA_SCORE           | 68.29 | 0.52           |
| PKA_SCORE            | 5.05  | 0.35           |
| BBB_SCORE            |       | 4.11           |

ARO\_R\_SCORE = Number of aromatic rings; HA\_SCORE = Number of heavy atoms.  
MWHNM\_SCORE =  $[-0.5MW(HBA+HBD)]$  where MW = molecular weight, HBA = number of hydrogen bond acceptor sites, and HBD = number of hydrogen bond donors;  
TPSA = topological polar surface area; PKA\_SCORE = Acidity strength. Gupta, M.; Lee, H. J.; Barden, C. J.; Weaver, D. "The Blood-Brain Barrier (BBB) Score" J. Med. Chem. 2019, 62 (21), 9824-9836.

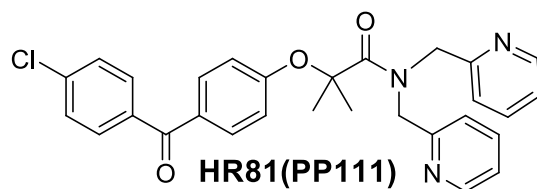

**HR81(PP111)**

| Calc. | MarvinSketch | IP   | RB | HLB  | logS      | PL    | MPA   | MSA    | HBA | MR     | hERG <sub>AM</sub> | hERG <sub>CM</sub> |
|-------|--------------|------|----|------|-----------|-------|-------|--------|-----|--------|--------------------|--------------------|
|       | T0           | NA   | 9  | 4.76 | -<br>6.41 | 54.16 | 77.69 | 707.76 | 8   | 138.68 | 5.24               | safe               |
| ClogP | 5.18         | 0.00 |    |      |           |       |       |        |     |        |                    |                    |
| ClogD | 5.17         | 0.00 |    |      |           |       |       |        |     |        |                    |                    |
| MW    | 500.00       | 0.00 |    |      |           |       |       |        |     |        |                    |                    |
| PSA   | 72.39        | 1.00 |    |      |           |       |       |        |     |        |                    |                    |
| HBD   | 0.00         | 1.00 |    |      |           |       |       |        |     |        |                    |                    |
| pKa   | 4.49         | 1.00 |    |      |           |       |       |        |     |        |                    |                    |
| MPO   | 3.00         |      |    |      |           |       |       |        |     |        |                    |                    |
| BBB   | 3.66         |      |    |      |           |       |       |        |     |        |                    |                    |
| LogBB | -0.15        |      |    |      |           |       |       |        |     |        |                    |                    |

IP = Isoelectric Point; RB = Number of rotatable bonds; HLB = hydrophilic-lipophilic balance; logS = water solubility; PL = polarizability( $\text{\AA}^3$ ); Minimal Projection Area ( $\text{\AA}^2$ ); MSA = molecular surface area; HBA = hydrogen bond acceptors; MR = Molar refractivity; ClogD = distribution at pKa; PSA = polar surface area; HBD = hydrogen bond donors; pKa = estimated acid strength; MPO = score for CNS penetration; LogBB = blood-brain distribution ( $0.152\text{ClogP} - 0.0148\text{PSA} + 0.138$ ); hERG = estimated pIC50 (pAct) value for hERG (the human ether-a-go-go (hERG) ion channel); hERG<sub>AM</sub> = hERG activity model; hERG<sub>CM</sub> = hERG classification model.

| BBB Score Calculator |       |                |
|----------------------|-------|----------------|
| Property             | Value | T <sub>0</sub> |
| ARO_R_SCORE          | 4     | 0.20           |
| HA_SCORE             | 36    | 0.48           |
| HWHBN_SCORE          | 0.22  | 0.99           |
| TPSA_SCORE           | 72.39 | 0.49           |
| PKA_SCORE            | 8.81  | 1.00           |
| BBB_SCORE            |       | 3.66           |

ARO\_R\_SCORE = Number of aromatic rings; HA\_SCORE = Number of heavy atoms.  
MWHNM\_SCORE =  $[-0.5MW(HBA+HBD)]$  where MW = molecular weight, HBA = number of hydrogen bond acceptor sites, and HBD = number of hydrogen bond donors;  
TPSA = topological polar surface area; PKA\_SCORE = Acidity strength. Gupta, M.; Lee, H. J.; Barden, C. J.; Weaver, D. "The Blood-Brain Barrier (BBB) Score" J. Med. Chem. 2019, 62 (21), 9824-9836.

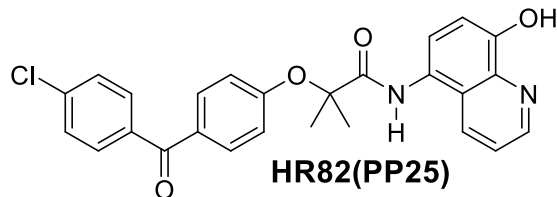

| Calc. | MarvinSketch |      | IP   | RB | HLB  | logS  | PL    | MPA   | MSA    | HBA | MR     | hERG <sub>AM</sub> | hERG <sub>CM</sub> |
|-------|--------------|------|------|----|------|-------|-------|-------|--------|-----|--------|--------------------|--------------------|
|       |              | T0   | 6.65 | 6  | 4.59 | -7.05 | 49.90 | 50.89 | 615.89 | 9   | 127.37 | 5.27               | safe               |
| ClogP | 5.65         | 0.00 |      |    |      |       |       |       |        |     |        |                    |                    |
| ClogD | 5.65         | 0.00 |      |    |      |       |       |       |        |     |        |                    |                    |
| MW    | 460.91       | 0.28 |      |    |      |       |       |       |        |     |        |                    |                    |
| PSA   | 88.52        | 1.00 |      |    |      |       |       |       |        |     |        |                    |                    |
| HBD   | 2.00         | 0.50 |      |    |      |       |       |       |        |     |        |                    |                    |
| pKa   | 4.53         | 1.00 |      |    |      |       |       |       |        |     |        |                    |                    |
| MPO   | 2.78         |      |      |    |      |       |       |       |        |     |        |                    |                    |
| BBB   | 3.21         |      |      |    |      |       |       |       |        |     |        |                    |                    |
| LogBB | -0.31        |      |      |    |      |       |       |       |        |     |        |                    |                    |

IP = Isoelectric Point; RB = Number of rotatable bonds; HLB = hydrophilic-lipophilic balance; logS = water solubility; PL = polarizability( $\text{\AA}^3$ ); Minimal Projection Area ( $\text{\AA}^2$ ); MSA = molecular surface area; HBA = hydrogen bond acceptors; MR = Molar refractivity; ClogD = distribution at pKa; PSA = polar surface area; HBD = hydrogen bond donors; pKa = estimated acid strength; MPO = score for CNS penetration; LogBB = blood-brain distribution ( $0.152\text{ClogP} - 0.0148\text{PSA} + 0.138$ ); hERG = estimated pIC<sub>50</sub> (pAct) value for hERG (the human ether-a-go-go (hERG) ion channel); hERG<sub>AM</sub> = hERG activity model; hERG<sub>CM</sub> = hERG classification model.

| BBB Score Calculator |       |                |
|----------------------|-------|----------------|
| Property             | Value | T <sub>0</sub> |
| ARO_R_SCORE          | 4     | 0.20           |
| HA_SCORE             | 33    | 0.61           |
| HWHBN_SCORE          | 0.33  | 0.76           |
| TPSA_SCORE           | 88.52 | 0.38           |
| PKA_SCORE            | 8.81  | 1.00           |
| BBB_SCORE            |       | 3.21           |

ARO\_R\_SCORE = Number of aromatic rings; HA\_SCORE = Number of heavy atoms.  
MWHNM\_SCORE =  $[-0.5MW(HBA+HBD)]$  where MW = molecular weight, HBA = number of hydrogen bond acceptor sites, and HBD = number of hydrogen bond donors;  
TPSA = topological polar surface area; PKA\_SCORE = Acidity strength. Gupta, M.; Lee, H. J.; Barden, C. J.; Weaver, D. "The Blood-Brain Barrier (BBB) Score" J. Med. Chem. 2019, 62 (21), 9824-9836.

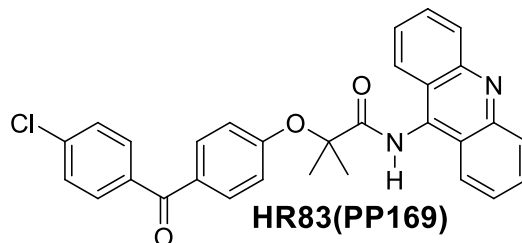

| Calc. | MarvinSketch |      | IP   | RB | HLB  | logS  | PL    | MPA   | MSA    | HBA | MR     | hERG <sub>AM</sub> | hERG <sub>CM</sub> |
|-------|--------------|------|------|----|------|-------|-------|-------|--------|-----|--------|--------------------|--------------------|
|       |              | T0   | 9.01 | 6  | 3.40 | -9.08 | 56.85 | 56.88 | 666.84 | 7   | 141.47 | 5.62               | Safe               |
| ClogP | 7.33         | 0.00 |      |    |      |       |       |       |        |     |        |                    |                    |
| ClogD | 7.32         | 0.00 |      |    |      |       |       |       |        |     |        |                    |                    |
| MW    | 494.98       | 0.04 |      |    |      |       |       |       |        |     |        |                    |                    |
| PSA   | 68.29        | 1.00 |      |    |      |       |       |       |        |     |        |                    |                    |
| HBD   | 1.00         | 0.75 |      |    |      |       |       |       |        |     |        |                    |                    |
| pKa   | 5.55         | 1.00 |      |    |      |       |       |       |        |     |        |                    |                    |
| MPO   | 2.79         |      |      |    |      |       |       |       |        |     |        |                    |                    |
| BBB   | 3.25         |      |      |    |      |       |       |       |        |     |        |                    |                    |
| LogBB | 0.24         |      |      |    |      |       |       |       |        |     |        |                    |                    |

IP = Isoelectric Point; RB = Number of rotatable bonds; HLB = hydrophilic-lipophilic balance; logS = water solubility; PL = polarizability( $\text{\AA}^3$ ); Minimal Projection Area ( $\text{\AA}^2$ ); MSA = molecular surface area; HBA = hydrogen bond acceptors; MR = Molar refractivity; ClogD = distribution at pKa; PSA = polar surface area; HBD = hydrogen bond donors; pKa = estimated acid strength; MPO = score for CNS penetration; LogBB = blood-brain distribution ( $0.152\text{ClogP} - 0.0148\text{PSA} + 0.138$ ); hERG = estimated pIC50 (pAct) value for hERG (the human ether-a-go-go (hERG) ion channel); hERG<sub>AM</sub> = hERG activity model; hERG<sub>CM</sub> = hERG classification model.

| BBB Score Calculator |       |                |
|----------------------|-------|----------------|
| Property             | Value | T <sub>0</sub> |
| ARO_R_SCORE          | 5     | 0.00           |
| HA_SCORE             | 36    | 0.48           |
| HWHBN_SCORE          | 0.22  | 0.99           |
| TPSA_SCORE           | 68.29 | 0.52           |
| PKA_SCORE            | 5.55  | 0.48           |
| BBB_SCORE            |       | 3.25           |

ARO\_R\_SCORE = Number of aromatic rings; HA\_SCORE = Number of heavy atoms.  
MWHNM\_SCORE =  $[-0.5MW(HBA+HBD)]$  where MW = molecular weight, HBA = number of hydrogen bond acceptor sites, and HBD = number of hydrogen bond donors;  
TPSA = topological polar surface area; PKA\_SCORE = Acidity strength. Gupta, M.; Lee, H. J.; Barden, C. J.; Weaver, D. "The Blood-Brain Barrier (BBB) Score" J. Med. Chem. 2019, 62 (21), 9824-9836.

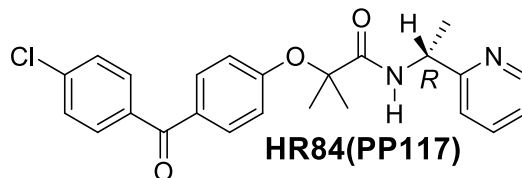

| Calc. | MarvinSketch |      | IP   | RB | HLB  | logS  | PL    | MPA   | MSA    | HBA | MR     | hERG <sub>AM</sub> | hERG <sub>CM</sub> |
|-------|--------------|------|------|----|------|-------|-------|-------|--------|-----|--------|--------------------|--------------------|
|       |              | T0   | 8.09 | 7  | 4.99 | -6.28 | 45.47 | 56.50 | 603.44 | 7   | 116.34 | 5.24               | Safe               |
| ClogP | 4.93         | 0.03 |      |    |      |       |       |       |        |     |        |                    |                    |
| ClogD | 4.93         | 0.00 |      |    |      |       |       |       |        |     |        |                    |                    |
| MW    | 422.91       | 0.55 |      |    |      |       |       |       |        |     |        |                    |                    |
| PSA   | 68.29        | 1.00 |      |    |      |       |       |       |        |     |        |                    |                    |
| HBD   | 1.00         | 0.75 |      |    |      |       |       |       |        |     |        |                    |                    |
| pKa   | 4.09         | 1.00 |      |    |      |       |       |       |        |     |        |                    |                    |
| MPO   | 3.33         |      |      |    |      |       |       |       |        |     |        |                    |                    |
| BBB   | 4.44         |      |      |    |      |       |       |       |        |     |        |                    |                    |
| LogBB | -0.12        |      |      |    |      |       |       |       |        |     |        |                    |                    |

IP = Isoelectric Point; RB = Number of rotatable bonds; HLB = hydrophilic-lipophilic balance; logS = water solubility; PL = polarizability( $\text{\AA}^3$ ); Minimal Projection Area ( $\text{\AA}^2$ ); MSA = molecular surface area; HBA = hydrogen bond acceptors; MR = Molar refractivity; ClogD = distribution at pKa; PSA = polar surface area; HBD = hydrogen bond donors; pKa = estimated acid strength; MPO = score for CNS penetration; LogBB = blood-brain distribution ( $0.152\text{ClogP} - 0.0148\text{PSA} + 0.138$ ); hERG = estimated pIC50 (pAct) value for hERG (the human ether-a-go-go (hERG) ion channel); hERG<sub>AM</sub> = hERG activity model; hERG<sub>CM</sub> = hERG classification model.

| BBB Score Calculator |       |                |
|----------------------|-------|----------------|
| Property             | Value | T <sub>0</sub> |
| ARO_R_SCORE          | 3     | 0.69           |
| HA_SCORE             | 30    | 0.75           |
| HWHBN_SCORE          | 0.24  | 0.97           |
| TPSA_SCORE           | 68.29 | 0.52           |
| PKA_SCORE            | 8.81  | 1.00           |
| BBB_SCORE            |       | 4.44           |

ARO\_R\_SCORE = Number of aromatic rings; HA\_SCORE = Number of heavy atoms.  
MWHNM\_SCORE =  $[-0.5MW(HBA+HBD)]$  where MW = molecular weight, HBA = number of hydrogen bond acceptor sites, and HBD = number of hydrogen bond donors;  
TPSA = topological polar surface area; PKA\_SCORE = Acidity strength. Gupta, M.; Lee, H. J.; Barden, C. J.; Weaver, D. "The Blood-Brain Barrier (BBB) Score" J. Med. Chem. 2019, 62 (21), 9824-9836.

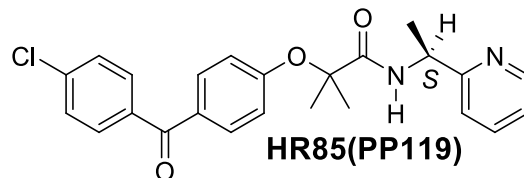

| Calc. | MarvinSketch |      | IP   | RB | HLB  | logS  | PL    | MPA   | MSA    | HBA | MR     | hERG <sub>AM</sub> | hERG <sub>CM</sub> |
|-------|--------------|------|------|----|------|-------|-------|-------|--------|-----|--------|--------------------|--------------------|
|       |              | T0   | 8.09 | 7  | 4.99 | -6.28 | 45.47 | 56.50 | 603.44 | 7   | 116.34 | 5.26               | safe               |
| ClogP | 4.93         | 0.03 |      |    |      |       |       |       |        |     |        |                    |                    |
| ClogD | 4.93         | 0.00 |      |    |      |       |       |       |        |     |        |                    |                    |
| MW    | 422.91       | 0.55 |      |    |      |       |       |       |        |     |        |                    |                    |
| PSA   | 68.29        | 1.00 |      |    |      |       |       |       |        |     |        |                    |                    |
| HBD   | 1.00         | 0.75 |      |    |      |       |       |       |        |     |        |                    |                    |
| pKa   | 4.09         | 1.00 |      |    |      |       |       |       |        |     |        |                    |                    |
| MPO   | 3.33         |      |      |    |      |       |       |       |        |     |        |                    |                    |
| BBB   | 4.44         |      |      |    |      |       |       |       |        |     |        |                    |                    |
| LogBB | -0.12        |      |      |    |      |       |       |       |        |     |        |                    |                    |

IP = Isoelectric Point; RB = Number of rotatable bonds; HLB = hydrophilic-lipophilic balance; logS = water solubility; PL = polarizability( $\text{\AA}^3$ ); Minimal Projection Area ( $\text{\AA}^2$ ); MSA = molecular surface area; HBA = hydrogen bond acceptors; MR = Molar refractivity; ClogD = distribution at pKa; PSA = polar surface area; HBD = hydrogen bond donors; pKa = estimated acid strength; MPO = score for CNS penetration; LogBB = blood-brain distribution ( $0.152\text{ClogP} - 0.0148\text{PSA} + 0.138$ ); hERG = estimated pIC50 (pAct) value for hERG (the human ether-a-go-go (hERG) ion channel); hERG<sub>AM</sub> = hERG activity model; hERG<sub>CM</sub> = hERG classification model.

| BBB Score Calculator |       |                |
|----------------------|-------|----------------|
| Property             | Value | T <sub>0</sub> |
| ARO_R_SCORE          | 3     | 0.69           |
| HA_SCORE             | 30    | 0.75           |
| HWHBN_SCORE          | 0.24  | 0.97           |
| TPSA_SCORE           | 68.29 | 0.52           |
| PKA_SCORE            | 8.81  | 1.00           |
| BBB_SCORE            |       | 4.44           |

ARO\_R\_SCORE = Number of aromatic rings; HA\_SCORE = Number of heavy atoms.  
MWHNM\_SCORE =  $[-0.5MW(HBA+HBD)]$  where MW = molecular weight, HBA = number of hydrogen bond acceptor sites, and HBD = number of hydrogen bond donors;  
TPSA = topological polar surface area; PKA\_SCORE = Acidity strength. Gupta, M.; Lee, H. J.; Barden, C. J.; Weaver, D. "The Blood-Brain Barrier (BBB) Score" J. Med. Chem. 2019, 62 (21), 9824-9836.

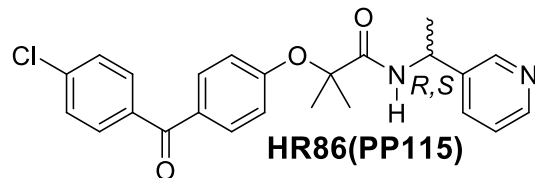

| Calc. | MarvinSketch |      | IP   | RB | HLB  | logS  | PL    | MPA   | MSA    | HBA | MR     | hERG <sub>AM</sub> | hERG <sub>CM</sub> |
|-------|--------------|------|------|----|------|-------|-------|-------|--------|-----|--------|--------------------|--------------------|
|       |              | T0   | 8.67 | 7  | 5.01 | -6.05 | 45.67 | 57.16 | 604.58 | 7   | 116.79 | 5.39               | safe               |
| ClogP | 4.70         | 0.15 |      |    |      |       |       |       |        |     |        |                    |                    |
| ClogD | 4.70         | 0.00 |      |    |      |       |       |       |        |     |        |                    |                    |
| MW    | 422.91       | 0.55 |      |    |      |       |       |       |        |     |        |                    |                    |
| PSA   | 68.29        | 1.00 |      |    |      |       |       |       |        |     |        |                    |                    |
| HBD   | 1.00         | 0.75 |      |    |      |       |       |       |        |     |        |                    |                    |
| pKa   | 4.80         | 1.00 |      |    |      |       |       |       |        |     |        |                    |                    |
| MPO   | 3.45         |      |      |    |      |       |       |       |        |     |        |                    |                    |
| BBB   | 4.44         |      |      |    |      |       |       |       |        |     |        |                    |                    |
| LogBB | -0.16        |      |      |    |      |       |       |       |        |     |        |                    |                    |

IP = Isoelectric Point; RB = Number of rotatable bonds; HLB = hydrophilic-lipophilic balance; logS = water solubility; PL = polarizability( $\text{\AA}^3$ ); Minimal Projection Area ( $\text{\AA}^2$ ); MSA = molecular surface area; HBA = hydrogen bond acceptors; MR = Molar refractivity; ClogD = distribution at pKa; PSA = polar surface area; HBD = hydrogen bond donors; pKa = estimated acid strength; MPO = score for CNS penetration; LogBB = blood-brain distribution ( $0.152\text{ClogP} - 0.0148\text{PSA} + 0.138$ ); hERG = estimated pIC50 (pAct) value for hERG (the human ether-a-go-go (hERG) ion channel); hERG<sub>AM</sub> = hERG activity model; hERG<sub>CM</sub> = hERG classification model.

| BBB Score Calculator |       |                |
|----------------------|-------|----------------|
| Property             | Value | T <sub>0</sub> |
| ARO_R_SCORE          | 3     | 0.69           |
| HA_SCORE             | 30    | 0.75           |
| HWHBN_SCORE          | 0.24  | 0.97           |
| TPSA_SCORE           | 68.29 | 0.52           |
| PKA_SCORE            | 8.81  | 1.00           |
| BBB_SCORE            |       | 4.44           |

ARO\_R\_SCORE = Number of aromatic rings; HA\_SCORE = Number of heavy atoms.  
MWHNM\_SCORE =  $[-0.5MW(HBA+HBD)]$  where MW = molecular weight, HBA = number of hydrogen bond acceptor sites, and HBD = number of hydrogen bond donors;  
TPSA = topological polar surface area; PKA\_SCORE = Acidity strength. Gupta, M.; Lee, H. J.; Barden, C. J.; Weaver, D. "The Blood-Brain Barrier (BBB) Score" J. Med. Chem. 2019, 62 (21), 9824-9836.

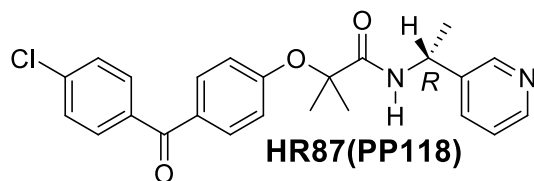

| Calc. | MarvinSketch |      | IP   | RB | HLB  | logS  | PL    | MPA   | MSA    | HBA | MR     | hERG <sub>AM</sub> | hERG <sub>CM</sub> |
|-------|--------------|------|------|----|------|-------|-------|-------|--------|-----|--------|--------------------|--------------------|
|       |              | T0   | 8.67 | 7  | 5.01 | -6.05 | 45.67 | 57.16 | 604.58 | 7   | 116.79 | 5.36               | safe               |
| ClogP | 4.70         | 0.15 |      |    |      |       |       |       |        |     |        |                    |                    |
| ClogD | 4.70         | 0.00 |      |    |      |       |       |       |        |     |        |                    |                    |
| MW    | 422.91       | 0.55 |      |    |      |       |       |       |        |     |        |                    |                    |
| PSA   | 68.29        | 1.00 |      |    |      |       |       |       |        |     |        |                    |                    |
| HBD   | 1.00         | 0.75 |      |    |      |       |       |       |        |     |        |                    |                    |
| pKa   | 4.79         | 1.00 |      |    |      |       |       |       |        |     |        |                    |                    |
| MPO   | 3.45         |      |      |    |      |       |       |       |        |     |        |                    |                    |
| BBB   | 3.40         |      |      |    |      |       |       |       |        |     |        |                    |                    |
| LogBB | -0.16        |      |      |    |      |       |       |       |        |     |        |                    |                    |

IP = Isoelectric Point; RB = Number of rotatable bonds; HLB = hydrophilic-lipophilic balance; logS = water solubility; PL = polarizability(Å<sup>3</sup>); Minimal Projection Area (Å<sup>2</sup>); MSA = molecular surface area; HBA = hydrogen bond acceptors; MR = Molar refractivity; ClogD = distribution at pKa; PSA = polar surface area; HBD = hydrogen bond donors; pKa = estimated acid strength; MPO = score for CNS penetration; LogBB = blood-brain distribution (0.152ClogP – 0.0148PSA + 0.138); hERG = estimated pIC<sub>50</sub> (pAct) value for hERG (the human ether-a-go-go (hERG) ion channel); hERG<sub>AM</sub> = hERG activity model; hERG<sub>CM</sub> = hERG classification model.

| BBB Score Calculator |       |                |
|----------------------|-------|----------------|
| Property             | Value | T <sub>0</sub> |
| ARO_R_SCORE          | 3     | 0.69           |
| HA_SCORE             | 30    | 0.75           |
| HWHBN_SCORE          | 0.24  | 0.97           |
| TPSA_SCORE           | 68.29 | 0.52           |
| PKA_SCORE            | 8.81  | 1.00           |
| BBB_SCORE            |       | 4.44           |

ARO\_R\_SCORE = Number of aromatic rings; HA\_SCORE = Number of heavy atoms.  
MWHNM\_SCORE =  $[-0.5MW(HBA+HBD)]$  where MW = molecular weight, HBA = number of hydrogen bond acceptor sites, and HBD = number of hydrogen bond donors;  
TPSA = topological polar surface area; PKA\_SCORE = Acidity strength. Gupta, M.; Lee, H. J.; Barden, C. J.; Weaver, D. "The Blood-Brain Barrier (BBB) Score" J. Med. Chem. 2019, 62 (21), 9824-9836.

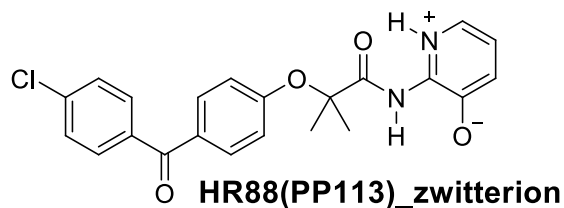

| Calc. | MarvinSketch | IP   | RB | HLB   | logS      | PL    | MPA   | MSA    | HBA | MR     | hERG <sub>AM</sub> | hERG <sub>CM</sub> |
|-------|--------------|------|----|-------|-----------|-------|-------|--------|-----|--------|--------------------|--------------------|
|       | T0           | NA   | 6  | 13.41 | -<br>5.75 | 42.37 | 45.59 | 554.75 | 9   | 122.36 | 5.17               | safe               |
| ClogP | 4.87         | 0.07 |    |       |           |       |       |        |     |        |                    |                    |
| ClogD | 4.63         | 0.00 |    |       |           |       |       |        |     |        |                    |                    |
| MW    | 410.85       | 0.64 |    |       |           |       |       |        |     |        |                    |                    |
| PSA   | 92.60        | 0.91 |    |       |           |       |       |        |     |        |                    |                    |
| HBD   | 2.00         | 0.50 |    |       |           |       |       |        |     |        |                    |                    |
| pKa   | 3.92         | 1.00 |    |       |           |       |       |        |     |        |                    |                    |
| MPO   | 3.12         |      |    |       |           |       |       |        |     |        |                    |                    |
| BBB   | 3.92         |      |    |       |           |       |       |        |     |        |                    |                    |
| LogBB | -0.49        |      |    |       |           |       |       |        |     |        |                    |                    |

IP = Isoelectric Point; RB = Number of rotatable bonds; HLB = hydrophilic-lipophilic balance; logS = water solubility; PL = polarizability(Å<sup>3</sup>); Minimal Projection Area (Å<sup>2</sup>); MSA = molecular surface area; HBA = hydrogen bond acceptors; MR = Molar refractivity; ClogD = distribution at pKa; PSA = polar surface area; HBD = hydrogen bond donors; pKa = estimated acid strength; MPO = score for CNS penetration; LogBB = blood-brain distribution (0.152ClogP – 0.0148PSA + 0.138); hERG = estimated pIC<sub>50</sub> (pAct) value for hERG (the human ether-a-go-go (hERG) ion channel); hERG<sub>AM</sub> = hERG activity model; hERG<sub>CM</sub> = hERG classification model.

| BBB Score Calculator |       |                |
|----------------------|-------|----------------|
| Property             | Value | T <sub>0</sub> |
| ARO_R_SCORE          | 3     | 0.69           |
| HA_SCORE             | 29    | 0.79           |
| HWHBN_SCORE          | 0.30  | 0.85           |
| TPSA_SCORE           | 92.60 | 0.35           |
| PKA_SCORE            | 7.52  | 0.90           |
| BBB_SCORE            |       | 3.92           |

ARO\_R\_SCORE = Number of aromatic rings; HA\_SCORE = Number of heavy atoms.  
MWHNM\_SCORE =  $[-0.5MW(HBA+HBD)]$  where MW = molecular weight, HBA = number of hydrogen bond acceptor sites, and HBD = number of hydrogen bond donors;  
TPSA = topological polar surface area; PKA\_SCORE = Acidity strength. Gupta, M.; Lee, H. J.; Barden, C. J.; Weaver, D. "The Blood-Brain Barrier (BBB) Score" J. Med. Chem. 2019, 62 (21), 9824-9836.

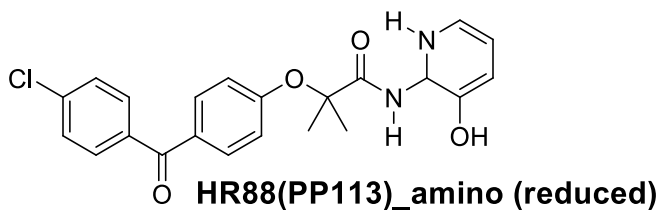

| Calc. | MarvinSketch | IP   | RB | HLB   | logS      | PL    | MPA   | MSA    | HBA | MR     | hERG <sub>AM</sub> | hERG <sub>CM</sub> |
|-------|--------------|------|----|-------|-----------|-------|-------|--------|-----|--------|--------------------|--------------------|
|       | T0           | 9.52 | 6  | 12.54 | -<br>5.97 | 42.86 | 47.06 | 540.14 | 9   | 112.46 | 5.52               | toxic              |
| ClogP | 3.72         | 0.64 |    |       |           |       |       |        |     |        |                    |                    |
| ClogD | 3.39         | 0.31 |    |       |           |       |       |        |     |        |                    |                    |
| MW    | 412.87       | 0.62 |    |       |           |       |       |        |     |        |                    |                    |
| PSA   | 87.66        | 1.00 |    |       |           |       |       |        |     |        |                    |                    |
| HBD   | 3.00         | 0.25 |    |       |           |       |       |        |     |        |                    |                    |
| pKa   | 4.84         | 1.00 |    |       |           |       |       |        |     |        |                    |                    |
| MPO   | 3.82         |      |    |       |           |       |       |        |     |        |                    |                    |
| BBB   | 3.75         |      |    |       |           |       |       |        |     |        |                    |                    |
| LogBB | -0.63        |      |    |       |           |       |       |        |     |        |                    |                    |

IP = Isoelectric Point; RB = Number of rotatable bonds; HLB = hydrophilic-lipophilic balance; logS = water solubility; PL = polarizability(Å<sup>3</sup>); Minimal Projection Area (Å<sup>2</sup>); MSA = molecular surface area; HBA = hydrogen bond acceptors; MR = Molar refractivity; ClogD = distribution at pKa; PSA = polar surface area; HBD = hydrogen bond donors; pKa = estimated acid strength; MPO = score for CNS penetration; LogBB = blood-brain distribution (0.152ClogP – 0.0148PSA + 0.138); hERG = estimated pIC50 (pAct) value for hERG (the human ether-a-go-go (hERG) ion channel); hERG<sub>AM</sub> = hERG activity model; hERG<sub>CM</sub> = hERG classification model.

| BBB Score Calculator |       |                |
|----------------------|-------|----------------|
| Property             | Value | T <sub>0</sub> |
| ARO_R_SCORE          | 2     | 1.00           |
| HA_SCORE             | 29    | 0.79           |
| HWHBN_SCORE          | 0.39  | 0.50           |
| TPSA_SCORE           | 87.66 | 0.39           |
| PKA_SCORE            | 7.35  | 0.88           |
| BBB_SCORE            |       | 3.75           |

ARO\_R\_SCORE = Number of aromatic rings; HA\_SCORE = Number of heavy atoms.  
MWHNM\_SCORE =  $[-0.5MW(HBA+HBD)]$  where MW = molecular weight, HBA = number of hydrogen bond acceptor sites, and HBD = number of hydrogen bond donors;  
TPSA = topological polar surface area; PKA\_SCORE = Acidity strength. Gupta, M.; Lee, H. J.; Barden, C. J.; Weaver, D. "The Blood-Brain Barrier (BBB) Score" J. Med. Chem. 2019, 62 (21), 9824-9836.

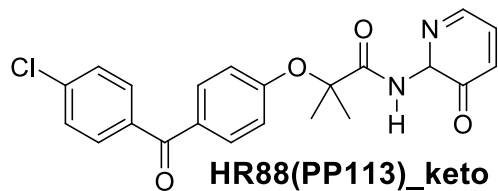

| Calc. | MarvinSketch |      | IP   | RB | HLB  | logS  | PL    | MPA   | MSA    | HBA | MR     | hERG <sub>AM</sub> | hERG <sub>CM</sub> |
|-------|--------------|------|------|----|------|-------|-------|-------|--------|-----|--------|--------------------|--------------------|
|       |              | T0   | 6.47 | 6  | 5.97 | -7.20 | 42.15 | 54.68 | 535.28 | 9   | 110.48 | 5.33               | safe               |
| ClogP | 4.07         | 0.46 |      |    |      |       |       |       |        |     |        |                    |                    |
| ClogD | 4.07         | 0.00 |      |    |      |       |       |       |        |     |        |                    |                    |
| MW    | 410.85       | 0.64 |      |    |      |       |       |       |        |     |        |                    |                    |
| PSA   | 84.83        | 1.00 |      |    |      |       |       |       |        |     |        |                    |                    |
| HBD   | 1.00         | 0.75 |      |    |      |       |       |       |        |     |        |                    |                    |
| pKa   | 2.62         | 1.00 |      |    |      |       |       |       |        |     |        |                    |                    |
| MPO   | 3.85         |      |      |    |      |       |       |       |        |     |        |                    |                    |
| BBB   | 4.38         |      |      |    |      |       |       |       |        |     |        |                    |                    |
| LogBB | -0.50        |      |      |    |      |       |       |       |        |     |        |                    |                    |

IP = Isoelectronic Point; RB = Number of rotatable bonds; HLB = hydrophilic-lipophilic balance; logS = water solubility; PL = polarizability( $\text{\AA}^3$ ); Minimal Projection Area ( $\text{\AA}^2$ ); MSA = molecular surface area; HBA = hydrogen bond acceptors; MR = Molar refractivity; ClogD = distribution at pKa; PSA = polar surface area; HBD = hydrogen bond donors; pKa = estimated acid strength; MPO = score for CNS penetration; LogBB = blood-brain distribution ( $0.152\text{ClogP} - 0.0148\text{PSA} + 0.138$ ); hERG = estimated pIC50 (pAct) value for hERG (the human ether-a-go-go (hERG) ion channel); hERG<sub>AM</sub> = hERG activity model; hERG<sub>CM</sub> = hERG classification model.

| BBB Score Calculator |       |                |
|----------------------|-------|----------------|
| Property             | Value | T <sub>0</sub> |
| ARO_R_SCORE          | 2     | 1.00           |
| HA_SCORE             | 29    | 0.79           |
| HWHBN_SCORE          | 0.30  | 0.85           |
| TPSA_SCORE           | 84.83 | 0.41           |
| PKA_SCORE            | 8.81  | 1.00           |
| BBB_SCORE            |       | 3.75           |

ARO\_R\_SCORE = Number of aromatic rings; HA\_SCORE = Number of heavy atoms.  
MWHNM\_SCORE =  $[-0.5MW(HBA+HBD)]$  where MW = molecular weight, HBA = number of hydrogen bond acceptor sites, and HBD = number of hydrogen bond donors;  
TPSA = topological polar surface area; PKA\_SCORE = Acidity strength. Gupta, M.; Lee, H. J.; Barden, C. J.; Weaver, D. "The Blood-Brain Barrier (BBB) Score" J. Med. Chem. 2019, 62 (21), 9824-9836.

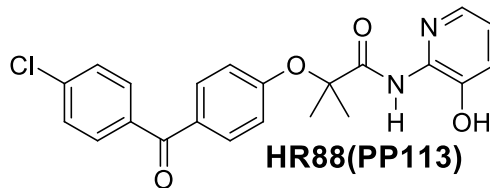

| Calc. | MarvinSketch | IP   | RB | HLB  | logS      | PL    | MPA   | MSA    | HBA | MR     | hERG <sub>AM</sub> | hERG <sub>CM</sub> |
|-------|--------------|------|----|------|-----------|-------|-------|--------|-----|--------|--------------------|--------------------|
|       | T0           | 6.16 | 6  | 5.62 | -<br>5.90 | 42.40 | 45.14 | 553.00 | 9   | 111.61 | 5.22               | safe               |
| ClogP | 4.87         | 0.07 |    |      |           |       |       |        |     |        |                    |                    |
| ClogD | 4.63         | 0.00 |    |      |           |       |       |        |     |        |                    |                    |
| MW    | 410.85       | 0.64 |    |      |           |       |       |        |     |        |                    |                    |
| PSA   | 88.52        | 1.00 |    |      |           |       |       |        |     |        |                    |                    |
| HBD   | 2.00         | 0.50 |    |      |           |       |       |        |     |        |                    |                    |
| pKa   | 3.92         | 1.00 |    |      |           |       |       |        |     |        |                    |                    |
| MPO   | 3.20         |      |    |      |           |       |       |        |     |        |                    |                    |
| BBB   | 3.72         |      |    |      |           |       |       |        |     |        |                    |                    |
| LogBB | -0.43        |      |    |      |           |       |       |        |     |        |                    |                    |

IP = Isoelectric Point; RB = Number of rotatable bonds; HLB = hydrophilic-lipophilic balance; logS = water solubility; PL = polarizability( $\text{\AA}^3$ ); Minimal Projection Area ( $\text{\AA}^2$ ); MSA = molecular surface area; HBA = hydrogen bond acceptors; MR = Molar refractivity; ClogD = distribution at pKa; PSA = polar surface area; HBD = hydrogen bond donors; pKa = estimated acid strength; MPO = score for CNS penetration; LogBB = blood-brain distribution ( $0.152\text{ClogP} - 0.0148\text{PSA} + 0.138$ ); hERG = estimated pIC<sub>50</sub> (pAct) value for hERG (the human ether-a-go-go (hERG) ion channel); hERG<sub>AM</sub> = hERG activity model; hERG<sub>CM</sub> = hERG classification model.

| BBB Score Calculator |       |                |
|----------------------|-------|----------------|
| Property             | Value | T <sub>0</sub> |
| ARO_R_SCORE          | 3     | 0.69           |
| HA_SCORE             | 29    | 0.79           |
| HWHBN_SCORE          | 0.35  | 0.69           |
| TPSA_SCORE           | 84.52 | 0.38           |
| PKA_SCORE            | 7.52  | 0.90           |
| BBB_SCORE            |       | 3.72           |

ARO\_R\_SCORE = Number of aromatic rings; HA\_SCORE = Number of heavy atoms.  
MWHNM\_SCORE =  $[-0.5MW(HBA+HBD)]$  where MW = molecular weight, HBA = number of hydrogen bond acceptor sites, and HBD = number of hydrogen bond donors;  
TPSA = topological polar surface area; PKA\_SCORE = Acidity strength. Gupta, M.; Lee, H. J.; Barden, C. J.; Weaver, D. "The Blood-Brain Barrier (BBB) Score" J. Med. Chem. 2019, 62 (21), 9824-9836.

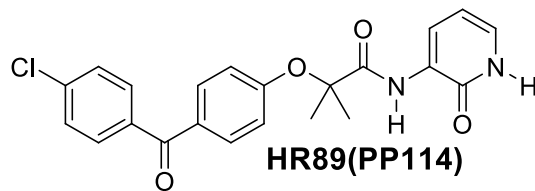

**HR89(PP114)**

| Calc. | MarvinSketch |      | IP | RB | HLB  | logS      | PL    | MPA   | MSA    | HBA | MR     | hERG <sub>AM</sub> | hERG <sub>CM</sub> |
|-------|--------------|------|----|----|------|-----------|-------|-------|--------|-----|--------|--------------------|--------------------|
|       |              | T0   | NA | 6  | 7.23 | -<br>6.49 | 42.32 | 43.44 | 529.29 | 8   | 111.66 | 5.13               | safe               |
| ClogP | 3.53         | 0.73 |    |    |      |           |       |       |        |     |        |                    |                    |
| ClogD | 3.53         | 0.24 |    |    |      |           |       |       |        |     |        |                    |                    |
| MW    | 410.85       | 0.64 |    |    |      |           |       |       |        |     |        |                    |                    |
| PSA   | 84.50        | 1.00 |    |    |      |           |       |       |        |     |        |                    |                    |
| HBD   | 2.00         | 0.50 |    |    |      |           |       |       |        |     |        |                    |                    |
| pKa   | 1.82         | 1.00 |    |    |      |           |       |       |        |     |        |                    |                    |
| MPO   | 4.11         |      |    |    |      |           |       |       |        |     |        |                    |                    |
| BBB   | 4.08         |      |    |    |      |           |       |       |        |     |        |                    |                    |
| LogBB | -0.57        |      |    |    |      |           |       |       |        |     |        |                    |                    |

IP = Isoelectric Point; RB = Number of rotatable bonds; HLB = hydrophilic-lipophilic balance; logS = water solubility; PL = polarizability( $\text{\AA}^3$ ); Minimal Projection Area ( $\text{\AA}^2$ ); MSA = molecular surface area; HBA = hydrogen bond acceptors; MR = Molar refractivity; ClogD = distribution at pKa; PSA = polar surface area; HBD = hydrogen bond donors; pKa = estimated acid strength; MPO = score for CNS penetration; LogBB = blood-brain distribution ( $0.152\text{ClogP} - 0.0148\text{PSA} + 0.138$ ); hERG = estimated pIC50 (pAct) value for hERG (the human ether-a-go-go (hERG) ion channel); hERG<sub>AM</sub> = hERG activity model; hERG<sub>CM</sub> = hERG classification model.

| BBB Score Calculator |       |                |
|----------------------|-------|----------------|
| Property             | Value | T <sub>0</sub> |
| ARO_R_SCORE          | 3     | 0.69           |
| HA_SCORE             | 29    | 0.79           |
| HWHBN_SCORE          | 0.30  | 0.85           |
| TPSA_SCORE           | 84.50 | 0.41           |
| PKA_SCORE            | 8.81  | 1.00           |
| BBB_SCORE            |       | 4.08           |

ARO\_R\_SCORE = Number of aromatic rings; HA\_SCORE = Number of heavy atoms.  
MWHNM\_SCORE =  $[-0.5MW(HBA+HBD)]$  where MW = molecular weight, HBA = number of hydrogen bond acceptor sites, and HBD = number of hydrogen bond donors;  
TPSA = topological polar surface area; PKA\_SCORE = Acidity strength. Gupta, M.; Lee, H. J.; Barden, C. J.; Weaver, D. "The Blood-Brain Barrier (BBB) Score" J. Med. Chem. 2019, 62 (21), 9824-9836.

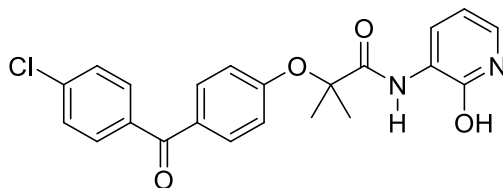

**HR89(PP114)\_aromatic**

| Calc. | MarvinSketch | IP   | RB | HLB  | logS  | PL    | MPA   | MSA    | HBA | MR     | hERG <sub>AM</sub> | hERG <sub>CM</sub> |
|-------|--------------|------|----|------|-------|-------|-------|--------|-----|--------|--------------------|--------------------|
|       | T0           | 6.17 | 6  | 5.85 | -6.00 | 42.40 | 43.69 | 552.22 | 9   | 111.61 | 5.21               | Safe               |
| ClogP | 4.87         | 0.07 |    |      |       |       |       |        |     |        |                    |                    |
| ClogD | 4.87         | 0.00 |    |      |       |       |       |        |     |        |                    |                    |
| MW    | 410.85       | 0.64 |    |      |       |       |       |        |     |        |                    |                    |
| PSA   | 88.52        | 1.00 |    |      |       |       |       |        |     |        |                    |                    |
| HBD   | 2.00         | 0.50 |    |      |       |       |       |        |     |        |                    |                    |
| pKa   | 1.82         | 1.00 |    |      |       |       |       |        |     |        |                    |                    |
| MPO   | 3.20         |      |    |      |       |       |       |        |     |        |                    |                    |
| BBB   | 3.77         |      |    |      |       |       |       |        |     |        |                    |                    |
| LogBB | -0.43        |      |    |      |       |       |       |        |     |        |                    |                    |

IP = Isoelectric Point; RB = Number of rotatable bonds; HLB = hydrophilic-lipophilic balance; logS = water solubility; PL = polarizability( $\text{\AA}^3$ ); Minimal Projection Area ( $\text{\AA}^2$ ); MSA = molecular surface area; HBA = hydrogen bond acceptors; MR = Molar refractivity; ClogD = distribution at pKa; PSA = polar surface area; HBD = hydrogen bond donors; pKa = estimated acid strength; MPO = score for CNS penetration; LogBB = blood-brain distribution ( $0.152\text{ClogP} - 0.0148\text{PSA} + 0.138$ ); hERG = estimated pIC50 (pAct) value for hERG (the human ether-a-go-go (hERG) ion channel); hERG<sub>AM</sub> = hERG activity model; hERG<sub>CM</sub> = hERG classification model.

| BBB Score Calculator |       |                |
|----------------------|-------|----------------|
| Property             | Value | T <sub>0</sub> |
| ARO_R_SCORE          | 3     | 0.69           |
| HA_SCORE             | 29    | 0.79           |
| HWHBN_SCORE          | 0.35  | 0.69           |
| TPSA_SCORE           | 88.52 | 0.38           |
| PKA_SCORE            | 8.81  | 1.00           |
| BBB_SCORE            |       | 3.77           |

ARO\_R\_SCORE = Number of aromatic rings; HA\_SCORE = Number of heavy atoms.  
MWHNM\_SCORE =  $[-0.5MW(HBA+HBD)]$  where MW = molecular weight, HBA = number of hydrogen bond acceptor sites, and HBD = number of hydrogen bond donors;  
TPSA = topological polar surface area; PKA\_SCORE = Acidity strength. Gupta, M.; Lee, H. J.; Barden, C. J.; Weaver, D. "The Blood-Brain Barrier (BBB) Score" J. Med. Chem. 2019, 62 (21), 9824-9836.

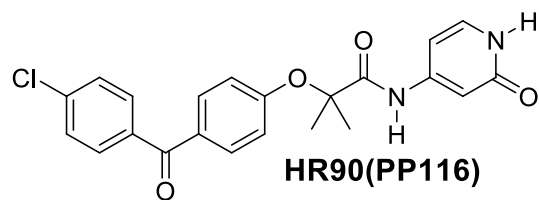

**HR90(PP116)**

| Calc. | MarvinSketch |      | IP | RB | HLB  | logS      | PL    | MPA   | MSA    | HBA | MR     | hERG <sub>AM</sub> | hERG <sub>CM</sub> |
|-------|--------------|------|----|----|------|-----------|-------|-------|--------|-----|--------|--------------------|--------------------|
|       |              | T0   | NA | 6  | 7.23 | -<br>6.49 | 42.32 | 42.75 | 530.46 | 8   | 111.59 | 5.16               | safe               |
| ClogP | 3.38         | 0.81 |    |    |      |           |       |       |        |     |        |                    |                    |
| ClogD | 3.38         | 0.31 |    |    |      |           |       |       |        |     |        |                    |                    |
| MW    | 410.85       | 0.64 |    |    |      |           |       |       |        |     |        |                    |                    |
| PSA   | 84.50        | 1.00 |    |    |      |           |       |       |        |     |        |                    |                    |
| HBD   | 2.00         | 0.50 |    |    |      |           |       |       |        |     |        |                    |                    |
| pKa   | 1.80         | 1.00 |    |    |      |           |       |       |        |     |        |                    |                    |
| MPO   | 4.26         |      |    |    |      |           |       |       |        |     |        |                    |                    |
| BBB   | 4.08         |      |    |    |      |           |       |       |        |     |        |                    |                    |
| LogBB | -0.60        |      |    |    |      |           |       |       |        |     |        |                    |                    |

IP = Isoelectric Point; RB = Number of rotatable bonds; HLB = hydrophilic-lipophilic balance; logS = water solubility; PL = polarizability( $\text{\AA}^3$ ); Minimal Projection Area ( $\text{\AA}^2$ ); MSA = molecular surface area; HBA = hydrogen bond acceptors; MR = Molar refractivity; ClogD = distribution at pKa; PSA = polar surface area; HBD = hydrogen bond donors; pKa = estimated acid strength; MPO = score for CNS penetration; LogBB = blood-brain distribution ( $0.152\text{ClogP} - 0.0148\text{PSA} + 0.138$ ); hERG = estimated pIC<sub>50</sub> (pAct) value for hERG (the human ether-a-go-go (hERG) ion channel); hERG<sub>AM</sub> = hERG activity model; hERG<sub>CM</sub> = hERG classification model.

| BBB Score Calculator |       |                |
|----------------------|-------|----------------|
| Property             | Value | T <sub>0</sub> |
| ARO_R_SCORE          | 3     | 0.69           |
| HA_SCORE             | 29    | 0.79           |
| HWHBN_SCORE          | 0.30  | 0.85           |
| TPSA_SCORE           | 84.50 | 0.41           |
| PKA_SCORE            | 8.81  | 1.00           |
| BBB_SCORE            |       | 4.08           |

ARO\_R\_SCORE = Number of aromatic rings; HA\_SCORE = Number of heavy atoms.  
MWHNM\_SCORE =  $[-0.5MW(HBA+HBD)]$  where MW = molecular weight, HBA = number of hydrogen bond acceptor sites, and HBD = number of hydrogen bond donors;  
TPSA = topological polar surface area; PKA\_SCORE = Acidity strength. Gupta, M.; Lee, H. J.; Barden, C. J.; Weaver, D. "The Blood-Brain Barrier (BBB) Score" J. Med. Chem. 2019, 62 (21), 9824-9836.

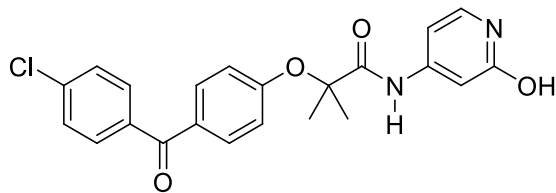

**HR90(PP116)\_aromatic**

| Calc. | MarvinSketch |      | IP   | RB | HLB  | logS  | PL    | MPA   | MSA    | HBA | MR     | hERG <sub>AM</sub> | hERG <sub>CM</sub> |
|-------|--------------|------|------|----|------|-------|-------|-------|--------|-----|--------|--------------------|--------------------|
|       |              | T0   | 6.92 | 6  | 5.85 | -6.00 | 42.40 | 44.16 | 554.21 | 9   | 111.61 | 5.21               | safe               |
| ClogP | 4.87         | 0.07 |      |    |      |       |       |       |        |     |        |                    |                    |
| ClogD | 4.87         | 0.00 |      |    |      |       |       |       |        |     |        |                    |                    |
| MW    | 410.85       | 0.64 |      |    |      |       |       |       |        |     |        |                    |                    |
| PSA   | 88.52        | 1.00 |      |    |      |       |       |       |        |     |        |                    |                    |
| HBD   | 2.00         | 0.5  |      |    |      |       |       |       |        |     |        |                    |                    |
| pKa   | 2.21         | 1.00 |      |    |      |       |       |       |        |     |        |                    |                    |
| MPO   | 3.20         |      |      |    |      |       |       |       |        |     |        |                    |                    |
| BBB   | 3.77         |      |      |    |      |       |       |       |        |     |        |                    |                    |
| LogBB | -0.43        |      |      |    |      |       |       |       |        |     |        |                    |                    |

IP = Isoelectric Point; RB = Number of rotatable bonds; HLB = hydrophilic-lipophilic balance; logS = water solubility; PL = polarizability( $\text{\AA}^3$ ); Minimal Projection Area ( $\text{\AA}^2$ ); MSA = molecular surface area; HBA = hydrogen bond acceptors; MR = Molar refractivity; ClogD = distribution at pKa; PSA = polar surface area; HBD = hydrogen bond donors; pKa = estimated acid strength; MPO = score for CNS penetration; LogBB = blood-brain distribution ( $0.152\text{ClogP} - 0.0148\text{PSA} + 0.138$ ); hERG = estimated pIC50 (pAct) value for hERG (the human ether-a-go-go (hERG) ion channel); hERG<sub>AM</sub> = hERG activity model; hERG<sub>CM</sub> = hERG classification model.

| BBB Score Calculator |       |                |
|----------------------|-------|----------------|
| Property             | Value | T <sub>0</sub> |
| ARO_R_SCORE          | 3     | 0.69           |
| HA_SCORE             | 29    | 0.79           |
| HWHBN_SCORE          | 0.35  | 0.69           |
| TPSA_SCORE           | 88.52 | 0.38           |
| PKA_SCORE            | 8.81  | 1.00           |
| BBB_SCORE            |       | 3.77           |

ARO\_R\_SCORE = Number of aromatic rings; HA\_SCORE = Number of heavy atoms.  
MWHNM\_SCORE =  $[-0.5MW(HBA+HBD)]$  where MW = molecular weight, HBA = number of hydrogen bond acceptor sites, and HBD = number of hydrogen bond donors;  
TPSA = topological polar surface area; PKA\_SCORE = Acidity strength. Gupta, M.; Lee, H. J.; Barden, C. J.; Weaver, D. "The Blood-Brain Barrier (BBB) Score" J. Med. Chem. 2019, 62 (21), 9824-9836.

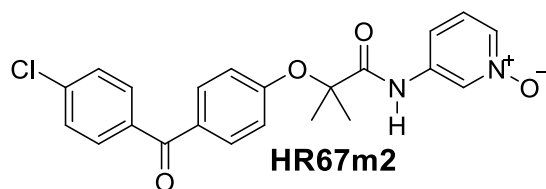

| Calc. | MarvinSketch | IP   | RB | HLB   | logS  | PL    | MPA   | MSA    | HBA | MR     | hERG <sub>AM</sub> | hERG <sub>CM</sub> |
|-------|--------------|------|----|-------|-------|-------|-------|--------|-----|--------|--------------------|--------------------|
|       | T0           | 6.13 | 6  | 11.51 | -6.13 | 42.26 | 43.33 | 558.19 | 9   | 112.63 | 5.36               | safe               |
| ClogP | 3.31         | 0.84 |    |       |       |       |       |        |     |        |                    |                    |
| ClogD | 3.31         | 0.84 |    |       |       |       |       |        |     |        |                    |                    |
| MW    | 410.85       | 0.64 |    |       |       |       |       |        |     |        |                    |                    |
| PSA   | 82.34        | 1.00 |    |       |       |       |       |        |     |        |                    |                    |
| HBD   | 1.00         | 0.75 |    |       |       |       |       |        |     |        |                    |                    |
| pKa   | 0.81         | 1.00 |    |       |       |       |       |        |     |        |                    |                    |
| MPO   | 4.57         |      |    |       |       |       |       |        |     |        |                    |                    |
| BBB   | 4.28         |      |    |       |       |       |       |        |     |        |                    |                    |
| LogBB |              |      |    |       |       |       |       |        |     |        |                    |                    |

IP = Isoelectric Point; RB = Number of rotatable bonds; HLB = hydrophilic-lipophilic balance; logS = water solubility; PL = polarizability( $\text{\AA}^3$ ); Minimal Projection Area ( $\text{\AA}^2$ ); MSA = molecular surface area; HBA = hydrogen bond acceptors; MR = Molar refractivity; ClogD = distribution at pKa; PSA = polar surface area; HBD = hydrogen bond donors; pKa = estimated acid strength; MPO = score for CNS penetration; LogBB = blood-brain distribution ( $0.152\text{ClogP} - 0.0148\text{PSA} + 0.138$ ); hERG = estimated pIC<sub>50</sub> (pAct) value for hERG (the human ether-a-go-go (hERG) ion channel); hERG<sub>AM</sub> = hERG activity model; hERG<sub>CM</sub> = hERG classification model.

| BBB Score Calculator |       |                |
|----------------------|-------|----------------|
| Property             | Value | T <sub>0</sub> |
| ARO_R_SCORE          | 3     | 0.69           |
| HA_SCORE             | 29    | 0.79           |
| HWHBN_SCORE          | 0.25  | 0.97           |
| TPSA_SCORE           | 82.34 | 0.43           |
| PKA_SCORE            | 8.81  | 1.00           |
| BBB_SCORE            |       | 4.28           |

ARO\_R\_SCORE = Number of aromatic rings; HA\_SCORE = Number of heavy atoms.  
MWHNM\_SCORE =  $[-0.5MW(HBA+HBD)]$  where MW = molecular weight, HBA = number of hydrogen bond acceptor sites, and HBD = number of hydrogen bond donors;  
TPSA = topological polar surface area; PKA\_SCORE = Acidity strength. Gupta, M.; Lee, H. J.; Barden, C. J.; Weaver, D. "The Blood-Brain Barrier (BBB) Score" J. Med. Chem. 2019, 62 (21), 9824-9836.

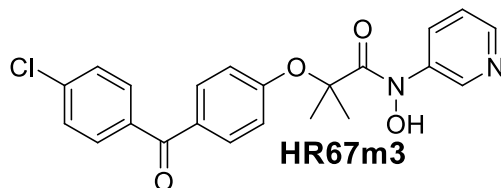

| Calc. | MarvinSketch |      | IP   | RB | HLB   | logS  | PL    | MPA   | MSA    | HBA | MR     | hERG <sub>AM</sub> | hERG <sub>CM</sub> |
|-------|--------------|------|------|----|-------|-------|-------|-------|--------|-----|--------|--------------------|--------------------|
|       |              | T0   | 5.82 | 6  | 11.77 | -5.06 | 42.41 | 51.70 | 556.21 | 9   | 109.30 | 5.63               | safe               |
| ClogP | 4.21         | 0.39 |      |    |       |       |       |       |        |     |        |                    |                    |
| ClogD | 4.06         | 0.00 |      |    |       |       |       |       |        |     |        |                    |                    |
| MW    | 410.85       | 0.64 |      |    |       |       |       |       |        |     |        |                    |                    |
| PSA   | 79.73        | 1.00 |      |    |       |       |       |       |        |     |        |                    |                    |
| HBD   | 1.00         | 0.75 |      |    |       |       |       |       |        |     |        |                    |                    |
| pKa   | 3.84         | 1.00 |      |    |       |       |       |       |        |     |        |                    |                    |
| MPO   | 3.78         |      |      |    |       |       |       |       |        |     |        |                    |                    |
| BBB   | 4.11         |      |      |    |       |       |       |       |        |     |        |                    |                    |
| LogBB |              |      |      |    |       |       |       |       |        |     |        |                    |                    |

IP = Isoelectric Point; RB = Number of rotatable bonds; HLB = hydrophilic-lipophilic balance; logS = water solubility; PL = polarizability( $\text{\AA}^3$ ); Minimal Projection Area ( $\text{\AA}^2$ ); MSA = molecular surface area; HBA = hydrogen bond acceptors; MR = Molar refractivity; ClogD = distribution at pKa; PSA = polar surface area; HBD = hydrogen bond donors; pKa = estimated acid strength; MPO = score for CNS penetration; LogBB = blood-brain distribution ( $0.152\text{ClogP} - 0.0148\text{PSA} + 0.138$ ); hERG = estimated pIC<sub>50</sub> (pAct) value for hERG (the human ether-a-go-go (hERG) ion channel); hERG<sub>AM</sub> = hERG activity model; hERG<sub>CM</sub> = hERG classification model.

| BBB Score Calculator |       |                |
|----------------------|-------|----------------|
| Property             | Value | T <sub>0</sub> |
| ARO_R_SCORE          | 3.00  | 0.69           |
| HA_SCORE             | 29.00 | 0.79           |
| HWHBN_SCORE          | 0.30  | 0.85           |
| TPSA_SCORE           | 79.73 | 0.44           |
| PKA_SCORE            | 7.79  | 0.94           |
| BBB_SCORE            |       | 4.11           |

ARO\_R\_SCORE = Number of aromatic rings; HA\_SCORE = Number of heavy atoms.  
MWHNM\_SCORE =  $[-0.5MW(HBA+HBD)]$  where MW = molecular weight, HBA = number of hydrogen bond acceptor sites, and HBD = number of hydrogen bond donors;  
TPSA = topological polar surface area; PKA\_SCORE = Acidity strength. Gupta, M.; Lee, H. J.; Barden, C. J.; Weaver, D. "The Blood-Brain Barrier (BBB) Score" J. Med. Chem. 2019, 62 (21), 9824-9836.

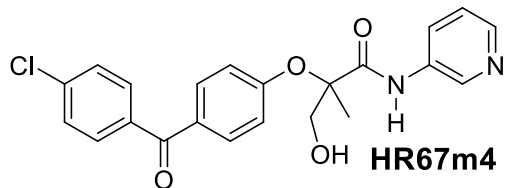

| Calc. | MarvinSketch |      | IP   | RB | HLB   | logS  | PL    | MPA   | MSA    | HBA | MR     | hERG <sub>AM</sub> | hERG <sub>CM</sub> |
|-------|--------------|------|------|----|-------|-------|-------|-------|--------|-----|--------|--------------------|--------------------|
|       |              | T0   | 8.35 | 7  | 12.06 | -5.44 | 42.41 | 40.63 | 553.24 | 9   | 110.86 | 5.40               | safe               |
| ClogP | 3.53         | 0.74 |      |    |       |       |       |       |        |     |        |                    |                    |
| ClogD | 3.53         | 0.24 |      |    |       |       |       |       |        |     |        |                    |                    |
| MW    | 410.85       | 0.64 |      |    |       |       |       |       |        |     |        |                    |                    |
| PSA   | 88.52        | 1.00 |      |    |       |       |       |       |        |     |        |                    |                    |
| HBD   | 2.00         | 0.50 |      |    |       |       |       |       |        |     |        |                    |                    |
| pKa   | 4.37         | 1.00 |      |    |       |       |       |       |        |     |        |                    |                    |
| MPO   | 4.11         |      |      |    |       |       |       |       |        |     |        |                    |                    |
| BBB   | 3.77         |      |      |    |       |       |       |       |        |     |        |                    |                    |
| LogBB |              |      |      |    |       |       |       |       |        |     |        |                    |                    |

IP = Isoelectric Point; RB = Number of rotatable bonds; HLB = hydrophilic-lipophilic balance; logS = water solubility; PL = polarizability( $\text{\AA}^3$ ); Minimal Projection Area ( $\text{\AA}^2$ ); MSA = molecular surface area; HBA = hydrogen bond acceptors; MR = Molar refractivity; ClogD = distribution at pKa; PSA = polar surface area; HBD = hydrogen bond donors; pKa = estimated acid strength; MPO = score for CNS penetration; LogBB = blood-brain distribution ( $0.152\text{ClogP} - 0.0148\text{PSA} + 0.138$ ); hERG = estimated pIC50 (pAct) value for hERG (the human ether-a-go-go (hERG) ion channel); hERG<sub>AM</sub> = hERG activity model; hERG<sub>CM</sub> = hERG classification model.

| BBB Score Calculator |       |                |
|----------------------|-------|----------------|
| Property             | Value | T <sub>0</sub> |
| ARO_R_SCORE          | 3     | 0.69           |
| HA_SCORE             | 29.00 | 0.79           |
| HWHBN_SCORE          | 0.35  | 0.69           |
| TPSA_SCORE           | 88.52 | 0.38           |
| PKA_SCORE            | 8.81  | 1.00           |
| BBB_SCORE            |       | 3.77           |

ARO\_R\_SCORE = Number of aromatic rings; HA\_SCORE = Number of heavy atoms.  
MWHNM\_SCORE =  $[-0.5MW(HBA+HBD)]$  where MW = molecular weight, HBA = number of hydrogen bond acceptor sites, and HBD = number of hydrogen bond donors;  
TPSA = topological polar surface area; PKA\_SCORE = Acidity strength. Gupta, M.; Lee, H. J.; Barden, C. J.; Weaver, D. "The Blood-Brain Barrier (BBB) Score" J. Med. Chem. 2019, 62 (21), 9824-9836.

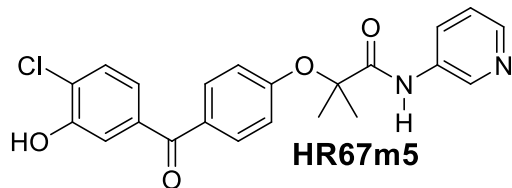

| Calc. | MarvinSketch |      | IP   | RB | HLB   | logS  | PL    | MPA   | MSA    | HBA | MR    | hERG <sub>AM</sub> | hERG <sub>CM</sub> |
|-------|--------------|------|------|----|-------|-------|-------|-------|--------|-----|-------|--------------------|--------------------|
|       |              | T0   | 6.10 | 6  | 12.02 | -5.44 | 42.42 | 40.55 | 552.87 | 9   | 11.29 | 5.76               | safe               |
| ClogP | 4.27         | 0.36 |      |    |       |       |       |       |        |     |       |                    |                    |
| ClogD | 4.14         | 0.00 |      |    |       |       |       |       |        |     |       |                    |                    |
| MW    | 410.85       | 0.64 |      |    |       |       |       |       |        |     |       |                    |                    |
| PSA   | 88.52        | 1.00 |      |    |       |       |       |       |        |     |       |                    |                    |
| HBD   | 2.00         | 0.50 |      |    |       |       |       |       |        |     |       |                    |                    |
| pKa   | 4.37         | 1.00 |      |    |       |       |       |       |        |     |       |                    |                    |
| MPO   | 3.50         |      |      |    |       |       |       |       |        |     |       |                    |                    |
| BBB   | 3.75         |      |      |    |       |       |       |       |        |     |       |                    |                    |
| LogBB |              |      |      |    |       |       |       |       |        |     |       |                    |                    |

IP = Isoelectric Point; RB = Number of rotatable bonds; HLB = hydrophilic-lipophilic balance; logS = water solubility; PL = polarizability( $\text{\AA}^3$ ); Minimal Projection Area ( $\text{\AA}^2$ ); MSA = molecular surface area; HBA = hydrogen bond acceptors; MR = Molar refractivity; ClogD = distribution at pKa; PSA = polar surface area; HBD = hydrogen bond donors; pKa = estimated acid strength; MPO = score for CNS penetration; LogBB = blood-brain distribution ( $0.152\text{ClogP} - 0.0148\text{PSA} + 0.138$ ); hERG = estimated pIC50 (pAct) value for hERG (the human ether-a-go-go (hERG) ion channel); hERG<sub>AM</sub> = hERG activity model; hERG<sub>CM</sub> = hERG classification model.

| BBB Score Calculator |       |                |
|----------------------|-------|----------------|
| Property             | Value | T <sub>0</sub> |
| ARO_R_SCORE          | 3.00  | 0.69           |
| HA_SCORE             | 29.00 | 0.79           |
| HWHBN_SCORE          | 0.35  | 0.69           |
| TPSA_SCORE           | 88.52 | 0.38           |
| PKA_SCORE            | 7.85  | 0.95           |
| BBB_SCORE            |       | 3.75           |

ARO\_R\_SCORE = Number of aromatic rings; HA\_SCORE = Number of heavy atoms.  
MWHNM\_SCORE =  $[-0.5MW(HBA+HBD)]$  where MW = molecular weight, HBA = number of hydrogen bond acceptor sites, and HBD = number of hydrogen bond donors;  
TPSA = topological polar surface area; PKA\_SCORE = Acidity strength. Gupta, M.; Lee, H. J.; Barden, C. J.; Weaver, D. "The Blood-Brain Barrier (BBB) Score" J. Med. Chem. 2019, 62 (21), 9824-9836.

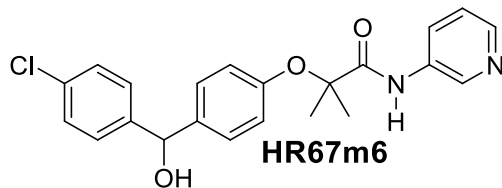

| Calc. | MarvinSketch | IP   | RB | HLB   | logS  | PL    | MPA   | MSA    | HBA | MR     | hERG <sub>AM</sub> | hERG <sub>CM</sub> |
|-------|--------------|------|----|-------|-------|-------|-------|--------|-----|--------|--------------------|--------------------|
|       | T0           | 8.37 | 6  | 11.34 | -4.95 | 42.17 | 53.36 | 554.15 | 7   | 109.84 | 5.49               | safe               |
| ClogP | 4.13         | 0.43 |    |       |       |       |       |        |     |        |                    |                    |
| ClogD | 4.13         | 0.00 |    |       |       |       |       |        |     |        |                    |                    |
| MW    | 396.87       | 0.74 |    |       |       |       |       |        |     |        |                    |                    |
| PSA   | 71.45        | 1.00 |    |       |       |       |       |        |     |        |                    |                    |
| HBD   | 2.00         | 0.50 |    |       |       |       |       |        |     |        |                    |                    |
| pKa   | 4.37         | 1.00 |    |       |       |       |       |        |     |        |                    |                    |
| MPO   | 3.67         |      |    |       |       |       |       |        |     |        |                    |                    |
| BBB   | 4.27         |      |    |       |       |       |       |        |     |        |                    |                    |
| LogBB |              |      |    |       |       |       |       |        |     |        |                    |                    |

IP = Isoelectric Point; RB = Number of rotatable bonds; HLB = hydrophilic-lipophilic balance; logS = water solubility; PL = polarizability( $\text{\AA}^3$ ); Minimal Projection Area ( $\text{\AA}^2$ ); MSA = molecular surface area; HBA = hydrogen bond acceptors; MR = Molar refractivity; ClogD = distribution at pKa; PSA = polar surface area; HBD = hydrogen bond donors; pKa = estimated acid strength; MPO = score for CNS penetration; LogBB = blood-brain distribution ( $0.152\text{ClogP} - 0.0148\text{PSA} + 0.138$ ); hERG = estimated pIC<sub>50</sub> (pAct) value for hERG (the human ether-a-go-go (hERG) ion channel); hERG<sub>AM</sub> = hERG activity model; hERG<sub>CM</sub> = hERG classification model.

| BBB Score Calculator |       |                |
|----------------------|-------|----------------|
| Property             | Value | T <sub>0</sub> |
| ARO_R_SCORE          | 3.00  | 0.69           |
| HA_SCORE             | 28.00 | 0.82           |
| HWHBN_SCORE          | 0.30  | 0.84           |
| TPSA_SCORE           | 71.45 | 0.50           |
| PKA_SCORE            | 8.81  | 1.00           |
| BBB_SCORE            |       | 4.27           |

ARO\_R\_SCORE = Number of aromatic rings; HA\_SCORE = Number of heavy atoms.  
MWHNM\_SCORE =  $[-0.5MW(HBA+HBD)]$  where MW = molecular weight, HBA = number of hydrogen bond acceptor sites, and HBD = number of hydrogen bond donors;  
TPSA = topological polar surface area; PKA\_SCORE = Acidity strength. Gupta, M.; Lee, H. J.; Barden, C. J.; Weaver, D. "The Blood-Brain Barrier (BBB) Score" J. Med. Chem. 2019, 62 (21), 9824-9836.

**2. MarvinSketch (Product version 22.21) Generated data including common chemotherapy drugs for CNS tumors compared to Pyridine-BPA variants:**

**(HR48-HR90)**

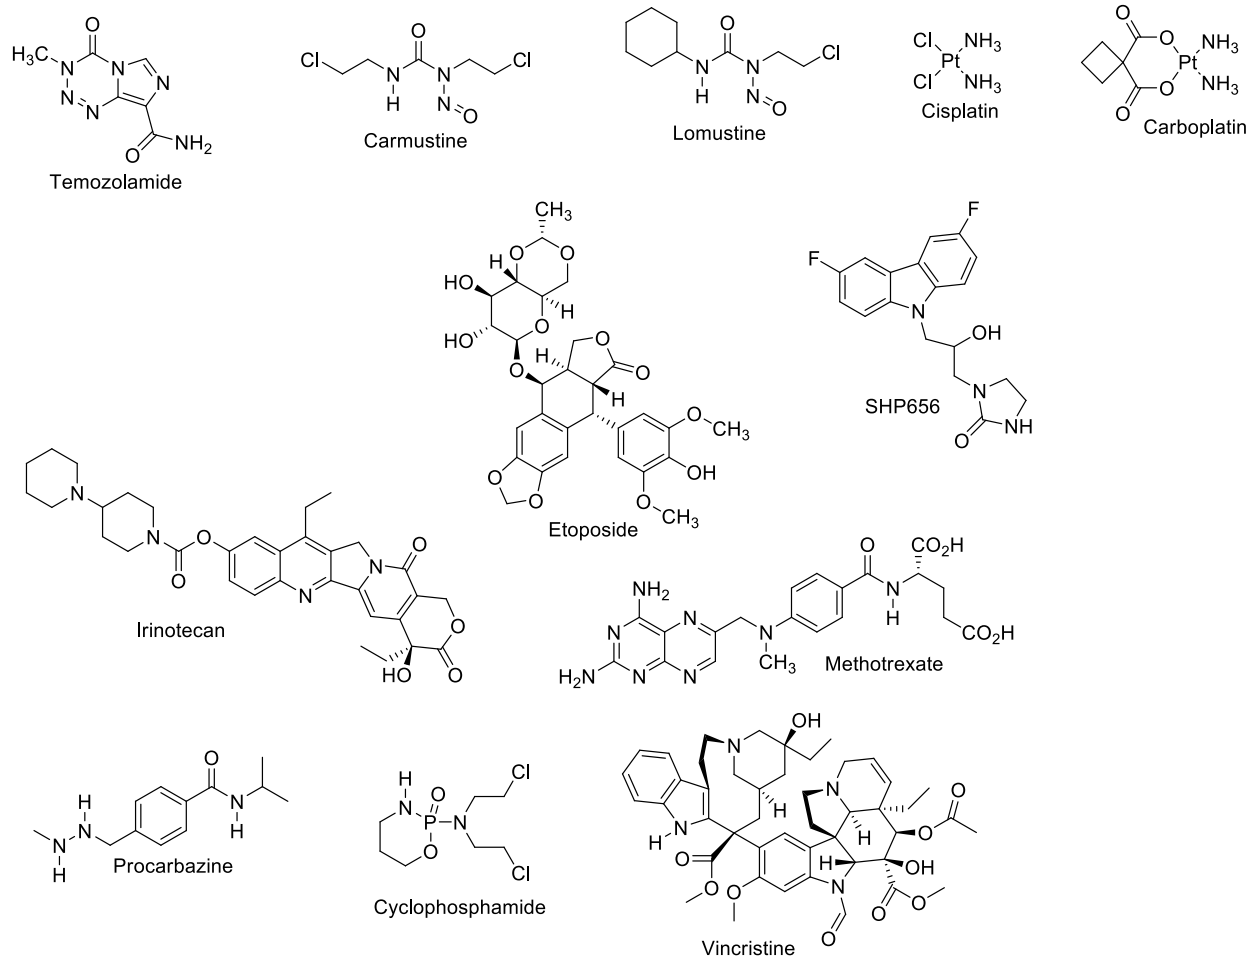

The most common chemotherapy drug combination used to treat brain and spinal cord tumours is PCV (procarbazine, lomustine and vincristine)



Temozolamide

| Calc. | MarvinSketch |                | IP | RB | HLB   | logS  | PL    | MPA   | MSA    | HBA | MR    | hERG <sub>AM</sub> | hERG <sub>CM</sub> |
|-------|--------------|----------------|----|----|-------|-------|-------|-------|--------|-----|-------|--------------------|--------------------|
|       |              | T <sub>0</sub> | NA | 1  | 18.31 | -0.90 | 16.08 | 26.31 | 232.02 | 7   | 47.86 | 3.67               | safe               |
| ClogP | -0.28        | 1.00           |    |    |       |       |       |       |        |     |       |                    |                    |
| ClogD | -0.28        | 1.00           |    |    |       |       |       |       |        |     |       |                    |                    |
| MW    | 194.15       | 1.00           |    |    |       |       |       |       |        |     |       |                    |                    |
| PSA   | 105.94       | 0.47           |    |    |       |       |       |       |        |     |       |                    |                    |
| HBD   | 2.00         | 0.50           |    |    |       |       |       |       |        |     |       |                    |                    |
| pKa   | -0.96        | 1.00           |    |    |       |       |       |       |        |     |       |                    |                    |
| MPO   | 4.97         |                |    |    |       |       |       |       |        |     |       |                    |                    |
| BBB   | 3.44         |                |    |    |       |       |       |       |        |     |       |                    |                    |
| LogBB | -1.47        |                |    |    |       |       |       |       |        |     |       |                    |                    |

IP = Isoelectric Point; RB = Number of rotatable bonds; HLB = hydrophilic-lipophilic balance; logS = water solubility; PL = polarizability( $\text{\AA}^3$ ); Minimal Projection Area ( $\text{\AA}^2$ ); MSA = molecular surface area; HBA = hydrogen bond acceptors; MR = Molar refractivity; ClogD = distribution at pH = 7.4; PSA = polar surface area ( $\text{\AA}^2$ ); HBD =

hydrogen bond donors; pKa = estimated acid strength; MPO = score for CNS penetration; LogBB = blood-brain distribution ( $0.152\text{ClogP} - 0.0148\text{PSA} + 0.138$ ); hERG = estimated pIC50 (pAct) value for hERG (the human ether-a-go-go (hERG) ion channel); hERG<sub>AM</sub> = hERG activity model; hERG<sub>CM</sub> = hERG classification model

| BBB Score Calculator |        |                |
|----------------------|--------|----------------|
| Property             | Value  | T <sub>0</sub> |
| ARO_R_SCORE          | 2      | 1.00           |
| HA_SCORE             | 14     | 0.89           |
| MWHBN_SCORE          | 0.43   | 0.36           |
| TPSA_SCORE           | 105.94 | 0.26           |
| PKA_SCORE            | 8.81   | 1.00           |
| BBB SCORE            |        | 3.44           |

ARO\_R\_SCORE = Number of aromatic rings; HA\_SCORE = Number of heavy atoms.

MWHNM\_SCORE =  $[-0.5\text{MW}(\text{HBA}+\text{HBD})]$  where MW = molecular weight, HBA = number of hydrogen bond acceptor sites, and HBD = number of hydrogen bond donors;

TPSA = topological polar surface area; PKA\_SCORE = Acidity strength. Gupta, M.;

Lee, H. J.; Barden, C. J.; Weaver, D. "The Blood-Brain Barrier (BBB) Score" J. Med.

Chem. 2019, 62 (21), 9824-9836.



| Calc. | MarvinSketch |      | IP | RB | HLB   | logS  | PL    | MPA   | MSA   | HBA | MR    | hERG <sub>AM</sub> | hERG <sub>CM</sub> |
|-------|--------------|------|----|----|-------|-------|-------|-------|-------|-----|-------|--------------------|--------------------|
|       |              |      | NA | 5  | 14.05 | -2.38 | 17.32 | 29.69 | 61.77 | 4   | 46.98 | 3.49               | safe               |
| ClogP | 1.02         | 1.00 |    |    |       |       |       |       |       |     |       |                    |                    |
| ClogD | 1.02         | 1.00 |    |    |       |       |       |       |       |     |       |                    |                    |
| MW    | 214.05       | 1.00 |    |    |       |       |       |       |       |     |       |                    |                    |
| PSA   | 61.77        | 1.00 |    |    |       |       |       |       |       |     |       |                    |                    |
| HBD   | 1.00         | 0.75 |    |    |       |       |       |       |       |     |       |                    |                    |
| pKa   | -5.34        | 1.00 |    |    |       |       |       |       |       |     |       |                    |                    |
| MPO   | 5.75         |      |    |    |       |       |       |       |       |     |       |                    |                    |
| BBB   | 4.26         |      |    |    |       |       |       |       |       |     |       |                    |                    |
| LogBB | -0.62        |      |    |    |       |       |       |       |       |     |       |                    |                    |

IP = Isoelectric Point; RB = Number of rotatable bonds; HLB = hydrophilic-lipophilic balance; logS = water solubility; PL = polarizability(Å<sup>3</sup>); Minimal Projection Area (Å<sup>2</sup>); MSA = molecular surface area; HBA = hydrogen bond acceptors; MR = Molar refractivity; ClogD = distribution at pH = 7.4; PSA = polar surface area; HBD = hydrogen bond donors; pKa = estimated acid strength; MPO = score for CNS penetration; LogBB = blood-brain distribution (0.152ClogP – 0.0148PSA + 0.138); hERG = estimated pIC50

(pAct) value for hERG (the human ether-a-go-go (hERG) ion channel); hERG<sub>AM</sub> = hERG activity model; hERG<sub>CM</sub> = hERG classification model

| BBB Score Calculator |       |                |
|----------------------|-------|----------------|
| Property             | Value | T <sub>0</sub> |
| ARO_R_SCORE          | 0     | 0.34           |
| HA_SCORE             | 12    | 0.79           |
| HWHBN_SCORE          | 0.21  | 1.00           |
| TPSA_SCORE           | 61.77 | 0.57           |
| PKA_SCORE            | 8.81  | 1.00           |
| BBB_SCORE            |       | 4.26           |

ARO\_R\_SCORE = Number of aromatic rings; HA\_SCORE = Number of heavy atoms.

MWHNM\_SCORE =  $[-0.5MW(HBA+HBD)]$  where MW = molecular weight, HBA = number of hydrogen bond acceptor sites, and HBD = number of hydrogen bond donors;

TPSA = topological polar surface area; PKA\_SCORE = Acidity strength. Gupta, M.;

Lee, H. J.; Barden, C. J.; Weaver, D. "The Blood-Brain Barrier (BBB) Score" J. Med.

Chem. 2019, 62 (21), 9824-9836.



Lomustine

| Calc. | MarvinSketch |                | IP | RB | HLB   | logS  | PL    | MPA   | MSA    | HBA | MR    | hERG <sub>AM</sub> | hERG <sub>CM</sub> |
|-------|--------------|----------------|----|----|-------|-------|-------|-------|--------|-----|-------|--------------------|--------------------|
|       |              | T <sub>0</sub> | NA | 4  | 11.95 | -3.28 | 21.92 | 33.97 | 351.15 | 4   | 58.65 | 3.70               | safe               |
| ClogP | 2.16         | 1.00           |    |    |       |       |       |       |        |     |       |                    |                    |
| ClogD | 2.16         | 0.92           |    |    |       |       |       |       |        |     |       |                    |                    |
| MW    | 233.70       | 1.00           |    |    |       |       |       |       |        |     |       |                    |                    |
| PSA   | 61.77        | 1.00           |    |    |       |       |       |       |        |     |       |                    |                    |
| HBD   | 1.00         | 0.75           |    |    |       |       |       |       |        |     |       |                    |                    |
| pKa   | -5.35        | 1.00           |    |    |       |       |       |       |        |     |       |                    |                    |
| MPO   | 5.67         |                |    |    |       |       |       |       |        |     |       |                    |                    |
| BBB   | 4.40         |                |    |    |       |       |       |       |        |     |       |                    |                    |
| LogBB | -0.45        |                |    |    |       |       |       |       |        |     |       |                    |                    |

IP = Isoelectric Point; RB = Number of rotatable bonds; HLB = hydrophilic-lipophilic balance; logS = water solubility; PL = polarizability(Å<sup>3</sup>); Minimal Projection Area (Å<sup>2</sup>); MSA = molecular surface area; HBA = hydrogen bond acceptors; MR = Molar refractivity; ClogD = distribution at pH = 7.4; PSA = polar surface area; HBD = hydrogen bond donors; pKa = estimated acid strength; MPO = score for CNS penetration; LogBB = blood-brain distribution (0.152ClogP – 0.0148PSA + 0.138); hERG = estimated pIC50

(pAct) value for hERG (the human ether-a-go-go (hERG) ion channel); hERG<sub>AM</sub> = hERG activity model; hERG<sub>CM</sub> = hERG classification model

| BBB Score Calculator |       |                |
|----------------------|-------|----------------|
| Property             | Value | T <sub>0</sub> |
| ARO_R_SCORE          | 0     | 0.34           |
| HA_SCORE             | 15    | 0.93           |
| HWHBN_SCORE          | 0.20  | 1.00           |
| TPSA_SCORE           | 61.77 | 0.57           |
| PKA_SCORE            | 8.81  | 1.00           |
| BBB_SCORE            |       | 4.40           |

ARO\_R\_SCORE = Number of aromatic rings; HA\_SCORE = Number of heavy atoms.

MWHNM\_SCORE =  $[-0.5MW(HBA+HBD)]$  where MW = molecular weight, HBA = number of hydrogen bond acceptor sites, and HBD = number of hydrogen bond donors;

TPSA = topological polar surface area; PKA\_SCORE = Acidity strength. Gupta, M.;

Lee, H. J.; Barden, C. J.; Weaver, D. "The Blood-Brain Barrier (BBB) Score" J. Med.

Chem. 2019, 62 (21), 9824-9836.

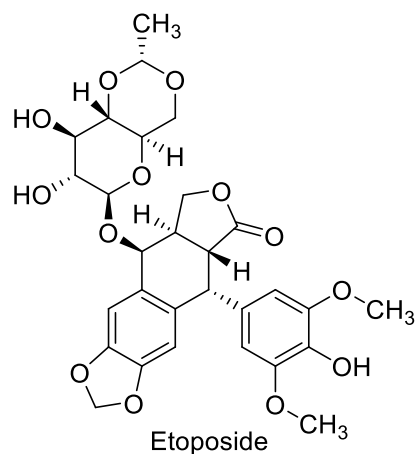

| Calc. | MarvinSketch |                | IP | RB | HLB   | logS  | PL    | MPA   | MSA    | HBA | MR     | hERG <sub>AM</sub> | hERG <sub>CM</sub> |
|-------|--------------|----------------|----|----|-------|-------|-------|-------|--------|-----|--------|--------------------|--------------------|
|       |              | T <sub>0</sub> | NA | 5  | 14.79 | -3.40 | 55.93 | 73.05 | 781.41 | 24  | 139.02 | 4.94               | safe               |
| ClogP | 1.16         | 1.00           |    |    |       |       |       |       |        |     |        |                    |                    |
| ClogD | 1.16         | 1.00           |    |    |       |       |       |       |        |     |        |                    |                    |
| MW    | 588.56       | 0.00           |    |    |       |       |       |       |        |     |        |                    |                    |
| PSA   | 160.83       | 0.00           |    |    |       |       |       |       |        |     |        |                    |                    |
| HBD   | 3.00         | 0.25           |    |    |       |       |       |       |        |     |        |                    |                    |
| pKa   | -3.69        | 1.00           |    |    |       |       |       |       |        |     |        |                    |                    |
| MPO   | 3.25         |                |    |    |       |       |       |       |        |     |        |                    |                    |
| BBB   | 1.74         |                |    |    |       |       |       |       |        |     |        |                    |                    |
| LogBB | -2.07        |                |    |    |       |       |       |       |        |     |        |                    |                    |

IP = Isoelectric Point; RB = Number of rotatable bonds; HLB = hydrophilic-lipophilic

balance; logS = water solubility; PL = polarizability(Å<sup>3</sup>); Minimal Projection Area (Å<sup>2</sup>);

MSA = molecular surface area; HBA = hydrogen bond acceptors; MR = Molar

refractivity; ClogD = distribution at pH = 7.4; PSA = polar surface area; HBD = hydrogen

bond donors; pKa = estimated acid strength; MPO = score for CNS penetration; LogBB = blood-brain distribution ( $0.152\text{ClogP} - 0.0148\text{PSA} + 0.138$ ); hERG = estimated pIC50 (pAct) value for hERG (the human ether-a-go-go (hERG) ion channel); hERG<sub>AM</sub> = hERG activity model; hERG<sub>CM</sub> = hERG classification model

| BBB Score Calculator |        |                |
|----------------------|--------|----------------|
| Property             | Value  | T <sub>0</sub> |
| ARO_R_SCORE          | 2      | 1.00           |
| HA_SCORE             | 42     | 0.24           |
| HWHBN_SCORE          | 0.62   | 0.00           |
| TPSA_SCORE           | 160.83 | 0.00           |
| PKA_SCORE            | 8.81   | 1.00           |
| BBB_SCORE            |        | 1.74           |

ARO\_R\_SCORE = Number of aromatic rings; HA\_SCORE = Number of heavy atoms.

MWHNM\_SCORE =  $[-0.5\text{MW}(\text{HBA}+\text{HBD})]$  where MW = molecular weight, HBA = number of hydrogen bond acceptor sites, and HBD = number of hydrogen bond donors;

TPSA = topological polar surface area; PKA\_SCORE = Acidity strength. Gupta, M.;

Lee, H. J.; Barden, C. J.; Weaver, D. "The Blood-Brain Barrier (BBB) Score" J. Med.

Chem. 2019, 62 (21), 9824-9836.

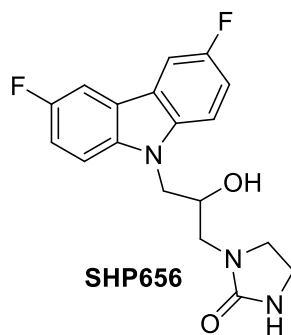

| Calc. | MarvinSketch |                | IP   | RB | HLB   | logS  | PL    | MPA   | MSA    | HBA | MR    | hERG <sub>AM</sub> | hERG <sub>CM</sub> |
|-------|--------------|----------------|------|----|-------|-------|-------|-------|--------|-----|-------|--------------------|--------------------|
|       |              | T <sub>0</sub> | 5.95 | 4  | 12.29 | -4.07 | 35.63 | 44.34 | 459.71 | 4   | 88.66 | 5.06               | safe               |
| ClogP | 1.93         | 1.00           |      |    |       |       |       |       |        |     |       |                    |                    |
| ClogD | 1.93         | 1.00           |      |    |       |       |       |       |        |     |       |                    |                    |
| MW    | 345.35       | 1.00           |      |    |       |       |       |       |        |     |       |                    |                    |
| PSA   | 57.50        | 1.00           |      |    |       |       |       |       |        |     |       |                    |                    |
| HBD   | 2.00         | 0.50           |      |    |       |       |       |       |        |     |       |                    |                    |
| pKa   | -1.85        | 1.00           |      |    |       |       |       |       |        |     |       |                    |                    |
| MPO   | 5.50         |                |      |    |       |       |       |       |        |     |       |                    |                    |
| BBB   | 4.81         |                |      |    |       |       |       |       |        |     |       |                    |                    |
| LogBB | -0.42        |                |      |    |       |       |       |       |        |     |       |                    |                    |

IP = Isoelectric Point; RB = Number of rotatable bonds; HLB = hydrophilic-lipophilic

balance; logS = water solubility; PL = polarizability(Å<sup>3</sup>); Minimal Projection Area (Å<sup>2</sup>);

MSA = molecular surface area; HBA = hydrogen bond acceptors; MR = Molar

refractivity; ClogD = distribution at pH = 7.4; PSA = polar surface area; HBD = hydrogen

bond donors; pKa = estimated acid strength; MPO = score for CNS penetration; LogBB = blood-brain distribution ( $0.152\text{ClogP} - 0.0148\text{PSA} + 0.138$ ); hERG = estimated pIC50 (pAct) value for hERG (the human ether-a-go-go (hERG) ion channel); hERG<sub>AM</sub> = hERG activity model; hERG<sub>CM</sub> = hERG classification model

| BBB Score Calculator |       |                |
|----------------------|-------|----------------|
| Property             | Value | T <sub>0</sub> |
| ARO_R_SCORE          | 3.00  | 0.69           |
| HA_SCORE             | 25.00 | 0.52           |
| HWHBN_SCORE          | 0.22  | 1.00           |
| TPSA_SCORE           | 57.50 | 0.60           |
| PKA_SCORE            | 8.81  | 1.00           |
| BBB_SCORE            |       | 4.81           |

ARO\_R\_SCORE = Number of aromatic rings; HA\_SCORE = Number of heavy atoms.

MWHNM\_SCORE =  $[-0.5\text{MW}(\text{HBA}+\text{HBD})]$  where MW = molecular weight, HBA = number of hydrogen bond acceptor sites, and HBD = number of hydrogen bond donors;

TPSA = topological polar surface area; PKA\_SCORE = Acidity strength. Gupta, M.;

Lee, H. J.; Barden, C. J.; Weaver, D. "The Blood-Brain Barrier (BBB) Score" J. Med.

Chem. 2019, 62 (21), 9824-9836.

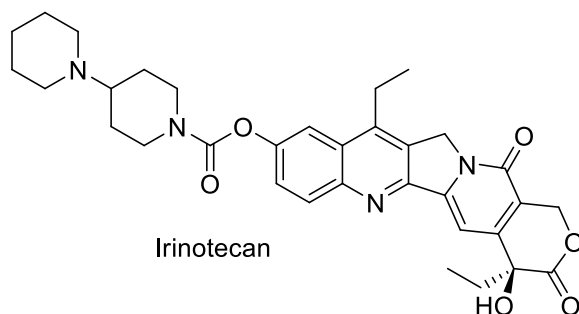

| Calc. | MarvinSketch |                | IP    | RB | HLB   | logS      | PL    | MPA   | MSA    | HBA | MR     | hERG <sub>AM</sub> | hERG <sub>CM</sub> |
|-------|--------------|----------------|-------|----|-------|-----------|-------|-------|--------|-----|--------|--------------------|--------------------|
|       |              | T <sub>0</sub> | 10.51 | 5  | 17.01 | -<br>3.47 | 63.01 | 67.37 | 841.25 | 10  | 161.33 | 5.49               | toxic              |
| ClogP | 2.78         | 1.00           |       |    |       |           |       |       |        |     |        |                    |                    |
| ClogD | 1.00         | 1.00           |       |    |       |           |       |       |        |     |        |                    |                    |
| MW    | 586.69       | 0.00           |       |    |       |           |       |       |        |     |        |                    |                    |
| PSA   | 112.51       | 0.25           |       |    |       |           |       |       |        |     |        |                    |                    |
| HBD   | 1.00         | 0.75           |       |    |       |           |       |       |        |     |        |                    |                    |
| pKa   | 9.17         | 0.41           |       |    |       |           |       |       |        |     |        |                    |                    |
| MPO   | 3.41         |                |       |    |       |           |       |       |        |     |        |                    |                    |
| BBB   | 3.13         |                |       |    |       |           |       |       |        |     |        |                    |                    |
| LogBB | -1.10        |                |       |    |       |           |       |       |        |     |        |                    |                    |

IP = Isoelectric Point; RB = Number of rotatable bonds; HLB = hydrophilic-lipophilic

balance; logS = water solubility; PL = polarizability(Å<sup>3</sup>); Minimal Projection Area (Å<sup>2</sup>);

MSA = molecular surface area; HBA = hydrogen bond acceptors; MR = Molar

refractivity; ClogD = distribution at pH = 7.4; PSA = polar surface area; HBD = hydrogen

bond donors; pKa = estimated acid strength; MPO = score for CNS penetration; LogBB = blood-brain distribution ( $0.152\text{ClogP} - 0.0148\text{PSA} + 0.138$ ); hERG = estimated pIC50 (pAct) value for hERG (the human ether-a-go-go (hERG) ion channel); hERG<sub>AM</sub> = hERG activity model; hERG<sub>CM</sub> = hERG classification model

| BBB Score Calculator |        |                |
|----------------------|--------|----------------|
| Property             | Value  | T <sub>0</sub> |
| ARO_R_SCORE          | 3      | 0.69           |
| HA_SCORE             | 43     | 0.21           |
| HWHBN_SCORE          | 0.29   | 0.87           |
| TPSA_SCORE           | 112.51 | 0.21           |
| PKA_SCORE            | 9.17   | 0.99           |
| BBB_SCORE            |        | 3.13           |

ARO\_R\_SCORE = Number of aromatic rings; HA\_SCORE = Number of heavy atoms.

MWHNM\_SCORE =  $[-0.5\text{MW}(\text{HBA}+\text{HBD})]$  where MW = molecular weight, HBA = number of hydrogen bond acceptor sites, and HBD = number of hydrogen bond donors;

TPSA = topological polar surface area; PKA\_SCORE = Acidity strength. Gupta, M.;

Lee, H. J.; Barden, C. J.; Weaver, D. "The Blood-Brain Barrier (BBB) Score" J. Med.

Chem. 2019, 62 (21), 9824-9836.

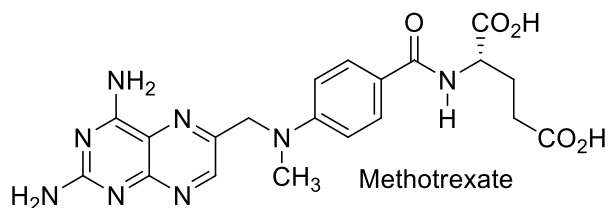

| Calc. | MarvinSketch   | IP   | RB | HLB   | logS | PL    | MPA   | MSA    | HBA | MR     | hERG <sub>AM</sub> | hERG <sub>CM</sub> |
|-------|----------------|------|----|-------|------|-------|-------|--------|-----|--------|--------------------|--------------------|
|       | T <sub>0</sub> | 3.16 | 9  | 15.30 | 0.00 | 43.52 | 55.08 | 601.64 | 17  | 119.21 | 4.71               | safe               |
| ClogP | -1.63          | 1.00 |    |       |      |       |       |        |     |        |                    |                    |
| ClogD | -5.70          | 1.00 |    |       |      |       |       |        |     |        |                    |                    |
| MW    | 454.45         | 0.33 |    |       |      |       |       |        |     |        |                    |                    |
| PSA   | 210.54         | 0.00 |    |       |      |       |       |        |     |        |                    |                    |
| HBD   | 7.00           | 0.00 |    |       |      |       |       |        |     |        |                    |                    |
| pKa   | 5.57           | 1.00 |    |       |      |       |       |        |     |        |                    |                    |
| MPO   | 3.33           |      |    |       |      |       |       |        |     |        |                    |                    |
| BBB   | 1.55           |      |    |       |      |       |       |        |     |        |                    |                    |
| LogBB | -3.04          |      |    |       |      |       |       |        |     |        |                    |                    |

IP = Isoelectric Point; RB = Number of rotatable bonds; HLB = hydrophilic-lipophilic balance; logS = water solubility; PL = polarizability(Å<sup>3</sup>); Minimal Projection Area (Å<sup>2</sup>); MSA = molecular surface area; HBA = hydrogen bond acceptors; MR = Molar refractivity; ClogD = distribution at pH = 7.4; PSA = polar surface area; HBD = hydrogen bond donors; pKa = estimated acid strength; MPO = score for CNS penetration; LogBB = blood-brain distribution (0.152ClogP – 0.0148PSA + 0.138); hERG = estimated pIC50

(pAct) value for hERG (the human ether-a-go-go (hERG) ion channel); hERG<sub>AM</sub> = hERG activity model; hERG<sub>CM</sub> = hERG classification model

| BBB Score Calculator |        |                |
|----------------------|--------|----------------|
| Property             | Value  | T <sub>0</sub> |
| ARO_R_SCORE          | 3      | 0.69           |
| HA_SCORE             | 33     | 0.61           |
| HWHBN_SCORE          | 0.80   | 0.00           |
| TPSA_SCORE           | 210.54 | 0.00           |
| PKA_SCORE            | 5.57   | 0.48           |
| BBB_SCORE            |        | 1.55           |

ARO\_R\_SCORE = Number of aromatic rings; HA\_SCORE = Number of heavy atoms.

MWHNM\_SCORE =  $[-0.5MW(HBA+HBD)]$  where MW = molecular weight, HBA = number of hydrogen bond acceptor sites, and HBD = number of hydrogen bond donors;

TPSA = topological polar surface area; PKA\_SCORE = Acidity strength. Gupta, M.;

Lee, H. J.; Barden, C. J.; Weaver, D. "The Blood-Brain Barrier (BBB) Score" J. Med.

Chem. 2019, 62 (21), 9824-9836.

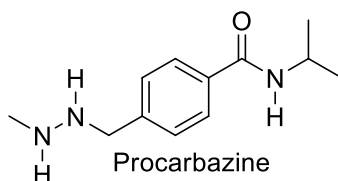

| Calc. | MarvinSketch |                | IP    | RB | HLB   | logS  | PL    | MPA   | MSA    | HBA | MR    | hERG <sub>AM</sub> | hERG <sub>CM</sub> |
|-------|--------------|----------------|-------|----|-------|-------|-------|-------|--------|-----|-------|--------------------|--------------------|
|       |              | T <sub>0</sub> | 11.66 | 5  | 22.85 | -1.02 | 25.22 | 38.17 | 376.41 | 4   | 86.98 | 4.84               | Safe               |
| ClogP | 0.99         | 1.00           |       |    |       |       |       |       |        |     |       |                    |                    |
| ClogD | -0.01        | 1.00           |       |    |       |       |       |       |        |     |       |                    |                    |
| MW    | 221.30       | 1.00           |       |    |       |       |       |       |        |     |       |                    |                    |
| PSA   | 53.16        | 1.00           |       |    |       |       |       |       |        |     |       |                    |                    |
| HBD   | 3.00         | 0.25           |       |    |       |       |       |       |        |     |       |                    |                    |
| pKa   | 8.36         | 0.82           |       |    |       |       |       |       |        |     |       |                    |                    |
| MPO   | 5.07         |                |       |    |       |       |       |       |        |     |       |                    |                    |
| BBB   | 4.22         |                |       |    |       |       |       |       |        |     |       |                    |                    |
| LogBB | -0.49        |                |       |    |       |       |       |       |        |     |       |                    |                    |

IP = Isoelectric Point; RB = Number of rotatable bonds; HLB = hydrophilic-lipophilic balance; logS = water solubility; PL = polarizability(Å<sup>3</sup>); Minimal Projection Area (Å<sup>2</sup>); MSA = molecular surface area; HBA = hydrogen bond acceptors; MR = Molar refractivity; ClogD = distribution at pH = 7.4; PSA = polar surface area; HBD = hydrogen bond donors; pKa = estimated acid strength; MPO = score for CNS penetration; LogBB = blood-brain distribution (0.152ClogP – 0.0148PSA + 0.138); hERG = estimated pIC50 (pAct) value for hERG (the human ether-a-go-go (hERG) ion channel); hERG<sub>AM</sub> = hERG activity model; hERG<sub>CM</sub> = hERG classification model

| BBB Score Calculator |       |                |
|----------------------|-------|----------------|
| Property             | Value | T <sub>0</sub> |
| ARO_R_SCORE          | 1     | 0.82           |
| HA_SCORE             | 16    | 0.95           |
| HWHBN_SCORE          | 0.40  | 0.46           |
| TPSA_SCORE           | 53.16 | 0.63           |
| PKA_SCORE            | 8.36  | 0.99           |
| BBB_SCORE            |       | 4.22           |

ARO\_R\_SCORE = Number of aromatic rings; HA\_SCORE = Number of heavy atoms.

MWHNM\_SCORE =  $[-0.5MW(HBA+HBD)]$  where MW = molecular weight, HBA = number of hydrogen bond acceptor sites, and HBD = number of hydrogen bond donors;

TPSA = topological polar surface area; PKA\_SCORE = Acidity strength. Gupta, M.;

Lee, H. J.; Barden, C. J.; Weaver, D. "The Blood-Brain Barrier (BBB) Score" J. Med.

Chem. 2019, 62 (21), 9824-9836.

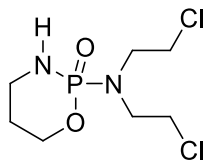

Cyclophosphamide

| Calc. | MarvinSketch |                | IP | RB | HLB   | logS  | PL    | MPA   | MSA    | HBA | MR    | hERG <sub>AM</sub> | hERG <sub>CM</sub> |
|-------|--------------|----------------|----|----|-------|-------|-------|-------|--------|-----|-------|--------------------|--------------------|
|       |              | T <sub>0</sub> | NA | 5  | 13.24 | -1.27 | 23.02 | 44.34 | 355.40 | 2   | 58.48 | 3.32               | safe               |
| ClogP | 0.10         | 1.00           |    |    |       |       |       |       |        |     |       |                    |                    |
| ClogD | 0.10         | 1.00           |    |    |       |       |       |       |        |     |       |                    |                    |
| MW    | 261.08       | 1.00           |    |    |       |       |       |       |        |     |       |                    |                    |
| PSA   | 41.57        | 1.00           |    |    |       |       |       |       |        |     |       |                    |                    |
| HBD   | 1.00         | 0.75           |    |    |       |       |       |       |        |     |       |                    |                    |
| pKa   | 0.00         | 1.00           |    |    |       |       |       |       |        |     |       |                    |                    |
| MPO   | 5.75         |                |    |    |       |       |       |       |        |     |       |                    |                    |
| BBB   | 4.41         |                |    |    |       |       |       |       |        |     |       |                    |                    |
| LogBB | -0.46        |                |    |    |       |       |       |       |        |     |       |                    |                    |

IP = Isoelectric Point; RB = Number of rotatable bonds; HLB = hydrophilic-lipophilic balance; logS = water solubility; PL = polarizability(Å<sup>3</sup>); Minimal Projection Area (Å<sup>2</sup>); MSA = molecular surface area; HBA = hydrogen bond acceptors; MR = Molar refractivity; ClogD = distribution at pH = 7.4; PSA = polar surface area; HBD = hydrogen bond donors; pKa = estimated acid strength; MPO = score for CNS penetration; LogBB = blood-brain distribution (0.152ClogP – 0.0148PSA + 0.138); hERG = estimated pIC50 (pAct) value for hERG (the human ether-a-go-go (hERG) ion channel); hERG<sub>AM</sub> = hERG activity model; hERG<sub>CM</sub> = hERG classification model

| BBB Score Calculator |       |                |
|----------------------|-------|----------------|
| Property             | Value | T <sub>0</sub> |
| ARO_R_SCORE          | 0     | 0.34           |
| HA_SCORE             | 14    | 0.89           |
| HWHBN_SCORE          | 0.12  | 0.85           |
| TPSA_SCORE           | 41.57 | 0.71           |
| PKA_SCORE            | 8.81  | 1.00           |
| BBB_SCORE            |       | 4.41           |

ARO\_R\_SCORE = Number of aromatic rings; HA\_SCORE = Number of heavy atoms.

MWHNM\_SCORE =  $[-0.5MW(HBA+HBD)]$  where MW = molecular weight, HBA = number of hydrogen bond acceptor sites, and HBD = number of hydrogen bond donors;

TPSA = topological polar surface area; PKA\_SCORE = Acidity strength. Gupta, M.;

Lee, H. J.; Barden, C. J.; Weaver, D. "The Blood-Brain Barrier (BBB) Score" J. Med.

Chem. 2019, 62 (21), 9824-9836.

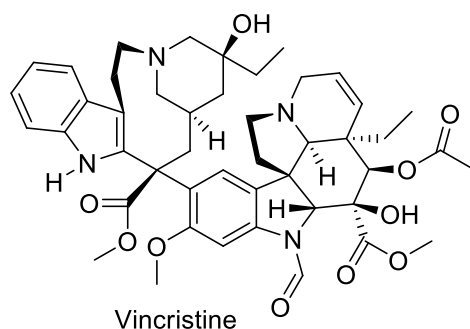

| Calc. | MarvinSketch   | IP   | RB | HLB   | logS  | PL    | MPA   | MSA | HBA | MR     | hERG <sub>AM</sub> | hERG <sub>CM</sub> |
|-------|----------------|------|----|-------|-------|-------|-------|-----|-----|--------|--------------------|--------------------|
|       | T <sub>0</sub> | 9.81 | 10 | 22.96 | -2.04 | 87.84 | 99.55 | NA  | 16  | 221.48 | 5.16               | toxic              |
| ClogP | 3.13           | 0.94 |    |       |       |       |       |     |     |        |                    |                    |
| ClogD | 1.54           | 1.00 |    |       |       |       |       |     |     |        |                    |                    |
| MW    | 824.97         | 0.00 |    |       |       |       |       |     |     |        |                    |                    |
| PSA   | 171.17         | 0.00 |    |       |       |       |       |     |     |        |                    |                    |
| HBD   | 3.00           | 0.25 |    |       |       |       |       |     |     |        |                    |                    |
| pKa   | 8.42           | 0.79 |    |       |       |       |       |     |     |        |                    |                    |
| MPO   | 2.97           |      |    |       |       |       |       |     |     |        |                    |                    |
| BBB   | 1.80           |      |    |       |       |       |       |     |     |        |                    |                    |
| LogBB | -1.92          |      |    |       |       |       |       |     |     |        |                    |                    |

IP = Isoelectric Point; RB = Number of rotatable bonds; HLB = hydrophilic-lipophilic balance; logS = water solubility; PL = polarizability(Å<sup>3</sup>); Minimal Projection Area (Å<sup>2</sup>); MSA = molecular surface area; HBA = hydrogen bond acceptors; MR = Molar refractivity; ClogD = distribution at pH = 7.4; PSA = polar surface area; HBD = hydrogen bond donors; pKa = estimated acid strength; MPO = score for CNS penetration; LogBB = blood-brain distribution (0.152ClogP – 0.0148PSA + 0.138); hERG = estimated pIC<sub>50</sub>

(pAct) value for hERG (the human ether-a-go-go (hERG) ion channel); hERG<sub>AM</sub> = hERG activity model; hERG<sub>CM</sub> = hERG classification model

| BBB Score Calculator |        |                |
|----------------------|--------|----------------|
| Property             | Value  | T <sub>0</sub> |
| ARO_R_SCORE          | 3      | 0.69           |
| HA_SCORE             | 60     | 0.00           |
| HWHBN_SCORE          | 0.42   | 0.41           |
| TPSA_SCORE           | 171.17 | 0.00           |
| PKA_SCORE            | 8.42   | 0.99           |
| BBB_SCORE            |        | 1.80           |

ARO\_R\_SCORE = Number of aromatic rings; HA\_SCORE = Number of heavy atoms.

MWHNM\_SCORE =  $[-0.5MW(HBA+HBD)]$  where MW = molecular weight, HBA = number of hydrogen bond acceptor sites, and HBD = number of hydrogen bond donors;

TPSA = topological polar surface area; PKA\_SCORE = Acidity strength. Gupta, M.;

Lee, H. J.; Barden, C. J.; Weaver, D. "The Blood-Brain Barrier (BBB) Score" J. Med.

Chem. 2019, 62 (21), 9824-9836.

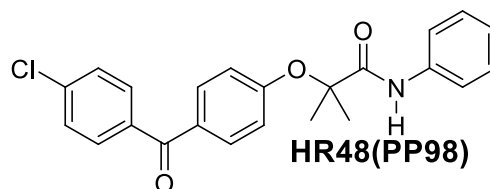

| Calc. | MarvinSketch |                | IP | RB | HLB  | logS      | PL    | MPA   | MSA    | HBA | MR     | hERG <sub>AM</sub> | hERG <sub>CM</sub> |
|-------|--------------|----------------|----|----|------|-----------|-------|-------|--------|-----|--------|--------------------|--------------------|
|       |              | T <sub>0</sub> | NA | 6  | 2.88 | -<br>7.07 | 42.67 | 45.91 | 551.01 | 6   | 111.47 | 5.30               | safe               |
| ClogP | 5.79         | 0.00           |    |    |      |           |       |       |        |     |        |                    |                    |
| ClogD | 5.79         | 0.00           |    |    |      |           |       |       |        |     |        |                    |                    |
| MW    | 393.87       | 0.76           |    |    |      |           |       |       |        |     |        |                    |                    |
| PSA   | 55.40        | 1.00           |    |    |      |           |       |       |        |     |        |                    |                    |
| HBD   | 1.00         | 0.75           |    |    |      |           |       |       |        |     |        |                    |                    |
| pKa   | -4.93        | 1.00           |    |    |      |           |       |       |        |     |        |                    |                    |
| MPO   | 3.51         |                |    |    |      |           |       |       |        |     |        |                    |                    |
| BBB   | 4.74         |                |    |    |      |           |       |       |        |     |        |                    |                    |
| LogBB | 0.20         |                |    |    |      |           |       |       |        |     |        |                    |                    |

IP = Isoelectric Point; RB = Number of rotatable bonds; HLB = hydrophilic-lipophilic balance; logS = water solubility; PL = polarizability(Å<sup>3</sup>); Minimal Projection Area (Å<sup>2</sup>); MSA = molecular surface area; HBA = hydrogen bond acceptors; MR = Molar refractivity; ClogD = distribution at pH = 7.4; PSA = polar surface area; HBD = hydrogen bond donors; pKa = estimated acid strength; MPO = score for CNS penetration; LogBB

= blood-brain distribution ( $0.152\text{ClogP} - 0.0148\text{PSA} + 0.138$ ); hERG = estimated pIC50 (pAct) value for hERG (the human ether-a-go-go (hERG) ion channel); hERG<sub>AM</sub> = hERG activity model; hERG<sub>CM</sub> = hERG classification model

| BBB Score Calculator |       |                |
|----------------------|-------|----------------|
| Property             | Value | T <sub>0</sub> |
| ARO_R_SCORE          | 3     | 0.69           |
| HA_SCORE             | 28    | 0.82           |
| HWHBN_SCORE          | 0.20  | 1.00           |
| TPSA_SCORE           | 55.40 | 0.61           |
| PKA_SCORE            | 8.81  | 1.00           |
| BBB_SCORE            | 4.74  |                |

ARO\_R\_SCORE = Number of aromatic rings; HA\_SCORE = Number of heavy atoms.

MWHNM\_SCORE =  $[-0.5\text{MW}(\text{HBA}+\text{HBD})]$  where MW = molecular weight, HBA = number of hydrogen bond acceptor sites, and HBD = number of hydrogen bond donors;

TPSA = topological polar surface area; PKA\_SCORE = Acidity strength. Gupta, M.;

Lee, H. J.; Barden, C. J.; Weaver, D. "The Blood-Brain Barrier (BBB) Score" J. Med.

Chem. 2019, 62 (21), 9824-9836.

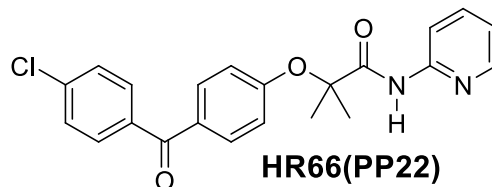

**HR66(PP22)**

| Calc. | MarvinSketch |      | IP   | RB | HLB  | logS      | PL    | MPA   | MSA    | HBA | MR     | hERG <sub>AM</sub> | hERG <sub>CM</sub> |
|-------|--------------|------|------|----|------|-----------|-------|-------|--------|-----|--------|--------------------|--------------------|
|       |              | T0   | 7.57 | 6  | 3.99 | -<br>6.45 | 41.78 | 49.64 | 543.63 | 7   | 109.63 | 5.19               | safe               |
| ClogP | 5.17         | 0.00 |      |    |      |           |       |       |        |     |        |                    |                    |
| ClogD | 5.17         | 0.00 |      |    |      |           |       |       |        |     |        |                    |                    |
| MW    | 394.86       | 0.75 |      |    |      |           |       |       |        |     |        |                    |                    |
| PSA   | 68.29        | 1.00 |      |    |      |           |       |       |        |     |        |                    |                    |
| HBD   | 1.00         | 0.75 |      |    |      |           |       |       |        |     |        |                    |                    |
| pKa   | 3.99         | 1.00 |      |    |      |           |       |       |        |     |        |                    |                    |
| MPO   | 3.50         |      |      |    |      |           |       |       |        |     |        |                    |                    |
| BBB   | 4.50         |      |      |    |      |           |       |       |        |     |        |                    |                    |
| LogBB | -0.09        |      |      |    |      |           |       |       |        |     |        |                    |                    |

IP = Isoelectric Point; RB = Number of rotatable bonds; HLB = hydrophilic-lipophilic balance; logS = water solubility; PL = polarizability( $\text{\AA}^3$ ); Minimal Projection Area ( $\text{\AA}^2$ ); MSA = molecular surface area; HBA = hydrogen bond acceptors; MR = Molar refractivity; ClogD = distribution at pKa; PSA = polar surface area; HBD = hydrogen bond donors; pKa = estimated acid strength; MPO = score for CNS penetration; LogBB = blood-brain distribution ( $0.152\text{ClogP} - 0.0148\text{PSA} + 0.138$ ); hERG = estimated pIC50

(pAct) value for hERG (the human ether-a-go-go (hERG) ion channel); hERG<sub>AM</sub> = hERG activity model; hERG<sub>CM</sub> = hERG classification model

| BBB Score Calculator |       |                |
|----------------------|-------|----------------|
| Property             | Value | T <sub>0</sub> |
| ARO_R_SCORE          | 3     | 0.69           |
| HA_SCORE             | 28    | 0.82           |
| HWHBN_SCORE          | 0.25  | 0.96           |
| TPSA_SCORE           | 68.29 | 0.52           |
| PKA_SCORE            | 8.81  | 1.00           |
| BBB_SCORE            |       | 4.50           |

ARO\_R\_SCORE = Number of aromatic rings; HA\_SCORE = Number of heavy atoms.

MWHNM\_SCORE =  $[-0.5MW(HBA+HBD)]$  where MW = molecular weight, HBA = number of hydrogen bond acceptor sites, and HBD = number of hydrogen bond donors;

TPSA = topological polar surface area; PKA\_SCORE = Acidity strength. Gupta, M.;

Lee, H. J.; Barden, C. J.; Weaver, D. "The Blood-Brain Barrier (BBB) Score" J. Med.

Chem. 2019, 62 (21), 9824-9836.

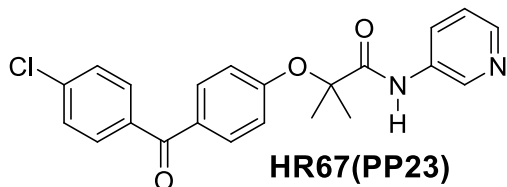

**HR67(PP23)**

| Calc. | MarvinSketch |      | IP   | RB | HLB  | logS | PL    | MPA   | MSA    | HBA | MR     | hERG <sub>AM</sub> | hERG <sub>CM</sub> |
|-------|--------------|------|------|----|------|------|-------|-------|--------|-----|--------|--------------------|--------------------|
|       |              | T0   | 8.39 | 6  | 4.54 | -    | 41.78 | 41.15 | 543.37 | 7   | 109.31 | 5.28               | safe               |
|       |              |      |      |    |      | 5.8  |       |       |        |     |        |                    |                    |
|       |              |      |      |    |      | 9    |       |       |        |     |        |                    |                    |
| ClogP | 4.58         | 0.21 |      |    |      |      |       |       |        |     |        |                    |                    |
| ClogD | 4.57         | 0.00 |      |    |      |      |       |       |        |     |        |                    |                    |
| MW    | 394.86       | 0.75 |      |    |      |      |       |       |        |     |        |                    |                    |
| PSA   | 68.29        | 1.00 |      |    |      |      |       |       |        |     |        |                    |                    |
| HBD   | 1.00         | 0.75 |      |    |      |      |       |       |        |     |        |                    |                    |
| pKa   | 4.37         | 1.00 |      |    |      |      |       |       |        |     |        |                    |                    |
| MPO   | 3.71         |      |      |    |      |      |       |       |        |     |        |                    |                    |
| BBB   | 4.50         |      |      |    |      |      |       |       |        |     |        |                    |                    |
| LogBB | -0.18        |      |      |    |      |      |       |       |        |     |        |                    |                    |

IP = Isoelectric Point; RB = Number of rotatable bonds; HLB = hydrophilic-lipophilic balance; logS = water solubility; PL = polarizability(Å<sup>3</sup>); Minimal Projection Area (Å<sup>2</sup>); MSA = molecular surface area; HBA = hydrogen bond acceptors; MR = Molar refractivity; ClogD = distribution at pKa; PSA = polar surface area; HBD = hydrogen bond donors; pKa = estimated acid strength; MPO = score for CNS penetration; LogBB = blood-brain distribution (0.152ClogP – 0.0148PSA + 0.138); hERG = estimated pIC50

(pAct) value for hERG (the human ether-a-go-go (hERG) ion channel); hERG<sub>AM</sub> = hERG activity model; hERG<sub>CM</sub> = hERG classification model

| BBB Score Calculator |       |                |
|----------------------|-------|----------------|
| Property             | Value | T <sub>0</sub> |
| ARO_R_SCORE          | 3     | 0.69           |
| HA_SCORE             | 28    | 0.82           |
| HWHBN_SCORE          | 0.25  | 0.96           |
| TPSA_SCORE           | 68.29 | 0.52           |
| PKA_SCORE            | 8.81  | 1.00           |
| BBB_SCORE            |       | 4.50           |

ARO\_R\_SCORE = Number of aromatic rings; HA\_SCORE = Number of heavy atoms.

MWHNM\_SCORE =  $[-0.5MW(HBA+HBD)]$  where MW = molecular weight, HBA = number of hydrogen bond acceptor sites, and HBD = number of hydrogen bond donors;

TPSA = topological polar surface area; PKA\_SCORE = Acidity strength. Gupta, M.;

Lee, H. J.; Barden, C. J.; Weaver, D. "The Blood-Brain Barrier (BBB) Score" J. Med.

Chem. 2019, 62 (21), 9824-9836.

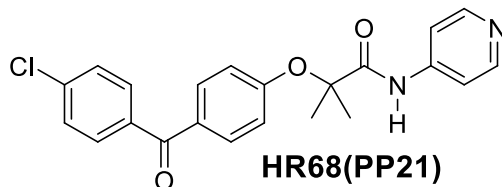

**HR68(PP21)**

| Calc. | MarvinSketch |      | IP   | RB | HLB  | logS      | PL    | MPA   | MSA    | HBA | MR     | hERG <sub>AM</sub> | hERG <sub>CM</sub> |
|-------|--------------|------|------|----|------|-----------|-------|-------|--------|-----|--------|--------------------|--------------------|
|       |              | T0   | 8.96 | 6  | 4.54 | -<br>5.89 | 41.78 | 44.70 | 453.10 | 7   | 109.31 | 5.28               | Safe               |
| ClogP | 4.58         | 0.21 |      |    |      |           |       |       |        |     |        |                    |                    |
| ClogD | 4.57         | 0.00 |      |    |      |           |       |       |        |     |        |                    |                    |
| MW    | 394.86       | 0.75 |      |    |      |           |       |       |        |     |        |                    |                    |
| PSA   | 68.29        | 1.00 |      |    |      |           |       |       |        |     |        |                    |                    |
| HBD   | 1.00         | 0.75 |      |    |      |           |       |       |        |     |        |                    |                    |
| pKa   | 4.85         | 1.00 |      |    |      |           |       |       |        |     |        |                    |                    |
| MPO   | 3.71         |      |      |    |      |           |       |       |        |     |        |                    |                    |
| BBB   | 4.50         |      |      |    |      |           |       |       |        |     |        |                    |                    |
| LogBB | -0.18        |      |      |    |      |           |       |       |        |     |        |                    |                    |

IP = Isoelectric Point; RB = Number of rotatable bonds; HLB = hydrophilic-lipophilic balance; logS = water solubility; PL = polarizability( $\text{\AA}^3$ ); Minimal Projection Area ( $\text{\AA}^2$ ); MSA = molecular surface area; HBA = hydrogen bond acceptors; MR = Molar refractivity; ClogD = distribution at pKa; PSA = polar surface area; HBD = hydrogen bond donors; pKa = estimated acid strength; MPO = score for CNS penetration; LogBB = blood-brain distribution ( $0.152\text{ClogP} - 0.0148\text{PSA} + 0.138$ ); hERG = estimated pIC50

(pAct) value for hERG (the human ether-a-go-go (hERG) ion channel); hERG<sub>AM</sub> = hERG activity model; hERG<sub>CM</sub> = hERG classification model

| BBB Score Calculator |       |                |
|----------------------|-------|----------------|
| Property             | Value | T <sub>0</sub> |
| ARO_R_SCORE          | 3     | 0.69           |
| HA_SCORE             | 28    | 0.82           |
| HWHBN_SCORE          | 0.25  | 0.96           |
| TPSA_SCORE           | 68.29 | 0.52           |
| PKA_SCORE            | 8.81  | 1.00           |
| BBB_SCORE            |       | 4.50           |

ARO\_R\_SCORE = Number of aromatic rings; HA\_SCORE = Number of heavy atoms.

MWHNM\_SCORE =  $[-0.5MW(HBA+HBD)]$  where MW = molecular weight, HBA = number of hydrogen bond acceptor sites, and HBD = number of hydrogen bond donors;

TPSA = topological polar surface area; PKA\_SCORE = Acidity strength. Gupta, M.;

Lee, H. J.; Barden, C. J.; Weaver, D. "The Blood-Brain Barrier (BBB) Score" J. Med.

Chem. 2019, 62 (21), 9824-9836.

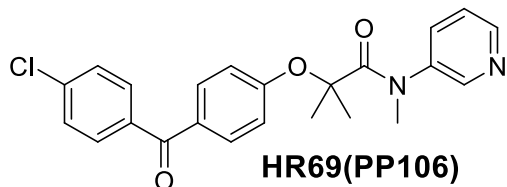

**HR69(PP106)**

| Calc. | MarvinSketch |      | IP | RB | HLB  | logS | PL    | MPA   | MSA    | HBA | MR     | hERG <sub>AM</sub> | hERG <sub>CM</sub> |
|-------|--------------|------|----|----|------|------|-------|-------|--------|-----|--------|--------------------|--------------------|
|       |              | T0   | NA | 6  | 4.69 | -    | 43.62 | 50.87 | 575.89 | 7   | 112.43 | 5.44               | safe               |
|       |              |      |    |    |      | 5.9  |       |       |        |     |        |                    |                    |
|       |              |      |    |    |      | 7    |       |       |        |     |        |                    |                    |
| ClogP | 4.44         | 0.28 |    |    |      |      |       |       |        |     |        |                    |                    |
| ClogD | 4.44         | 0.00 |    |    |      |      |       |       |        |     |        |                    |                    |
| MW    | 408.88       | 0.65 |    |    |      |      |       |       |        |     |        |                    |                    |
| PSA   | 59.50        | 1.00 |    |    |      |      |       |       |        |     |        |                    |                    |
| HBD   | 0.00         | 1.00 |    |    |      |      |       |       |        |     |        |                    |                    |
| pKa   | 4.33         | 1.00 |    |    |      |      |       |       |        |     |        |                    |                    |
| MPO   | 3.93         |      |    |    |      |      |       |       |        |     |        |                    |                    |
| BBB   | 4.65         |      |    |    |      |      |       |       |        |     |        |                    |                    |
| LogBB | -0.07        |      |    |    |      |      |       |       |        |     |        |                    |                    |

IP = Isoelectric Point; RB = Number of rotatable bonds; HLB = hydrophilic-lipophilic balance; logS = water solubility; PL = polarizability(Å<sup>3</sup>); Minimal Projection Area (Å<sup>2</sup>); MSA = molecular surface area; HBA = hydrogen bond acceptors; MR = Molar refractivity; ClogD = distribution at pKa; PSA = polar surface area; HBD = hydrogen bond donors; pKa = estimated acid strength; MPO = score for CNS penetration; LogBB = blood-brain distribution (0.152ClogP – 0.0148PSA + 0.138); hERG = estimated pIC50

(pAct) value for hERG (the human ether-a-go-go (hERG) ion channel); hERG<sub>AM</sub> = hERG activity model; hERG<sub>CM</sub> = hERG classification model

| BBB Score Calculator |       |                |
|----------------------|-------|----------------|
| Property             | Value | T <sub>0</sub> |
| ARO_R_SCORE          | 3     | 0.69           |
| HA_SCORE             | 29    | 0.79           |
| HWHBN_SCORE          | 0.20  | 1.00           |
| TPSA_SCORE           | 59.50 | 0.58           |
| PKA_SCORE            | 8.81  | 1.00           |
| BBB_SCORE            |       | 4.65           |

ARO\_R\_SCORE = Number of aromatic rings; HA\_SCORE = Number of heavy atoms.

MWHNM\_SCORE =  $[-0.5MW(HBA+HBD)]$  where MW = molecular weight, HBA = number of hydrogen bond acceptor sites, and HBD = number of hydrogen bond donors;

TPSA = topological polar surface area; PKA\_SCORE = Acidity strength. Gupta, M.;

Lee, H. J.; Barden, C. J.; Weaver, D. "The Blood-Brain Barrier (BBB) Score" J. Med.

Chem. 2019, 62 (21), 9824-9836.

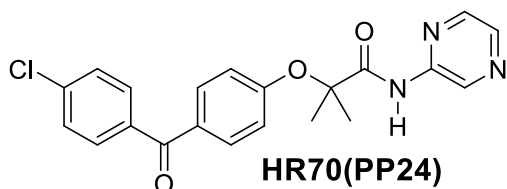

**HR70(PP24)**

| Calc. | MarvinSketch |      | IP   | RB | HLB  | logS      | PL    | MPA   | MSA    | HBA | MR     | hERG <sub>AM</sub> | hERG <sub>CM</sub> |
|-------|--------------|------|------|----|------|-----------|-------|-------|--------|-----|--------|--------------------|--------------------|
|       |              | T0   | 5.88 | 6  | 5.65 | -<br>5.27 | 40.90 | 44.62 | 536.59 | 8   | 107.47 | 5.18               | safe               |
| ClogP | 3.95         | 0.52 |      |    |      |           |       |       |        |     |        |                    |                    |
| ClogD | 3.95         | 0.02 |      |    |      |           |       |       |        |     |        |                    |                    |
| MW    | 395.84       | 0.74 |      |    |      |           |       |       |        |     |        |                    |                    |
| PSA   | 81.18        | 1.00 |      |    |      |           |       |       |        |     |        |                    |                    |
| HBD   | 1.00         | 7.25 |      |    |      |           |       |       |        |     |        |                    |                    |
| pKa   | 0.07         | 1.00 |      |    |      |           |       |       |        |     |        |                    |                    |
| MPO   | 4.04         |      |      |    |      |           |       |       |        |     |        |                    |                    |
| BBB   | 4.14         |      |      |    |      |           |       |       |        |     |        |                    |                    |
| LogBB | -0.46        |      |      |    |      |           |       |       |        |     |        |                    |                    |

IP = Isoelectric Point; RB = Number of rotatable bonds; HLB = hydrophilic-lipophilic balance; logS = water solubility; PL = polarizability(Å<sup>3</sup>); Minimal Projection Area (Å<sup>2</sup>); MSA = molecular surface area; HBA = hydrogen bond acceptors; MR = Molar refractivity; ClogD = distribution at pKa; PSA = polar surface area; HBD = hydrogen bond donors; pKa = estimated acid strength; MPO = score for CNS penetration; LogBB = blood-brain distribution (0.152ClogP – 0.0148PSA + 0.138); hERG = estimated pIC50

(pAct) value for hERG (the human ether-a-go-go (hERG) ion channel); hERG<sub>AM</sub> = hERG activity model; hERG<sub>CM</sub> = hERG classification model

| BBB Score Calculator |       |                |
|----------------------|-------|----------------|
| Property             | Value | T <sub>0</sub> |
| ARO_R_SCORE          | 3.00  | 0.69           |
| HA_SCORE             | 28.00 | 0.82           |
| HWHBN_SCORE          | 0.30  | 0.84           |
| TPSA_SCORE           | 81.18 | 0.43           |
| PKA_SCORE            | 8.81  | 1.00           |
| BBB_SCORE            |       | 4.14           |

ARO\_R\_SCORE = Number of aromatic rings; HA\_SCORE = Number of heavy atoms.

MWHNM\_SCORE =  $[-0.5MW(HBA+HBD)]$  where MW = molecular weight, HBA = number of hydrogen bond acceptor sites, and HBD = number of hydrogen bond donors;

TPSA = topological polar surface area; PKA\_SCORE = Acidity strength. Gupta, M.;

Lee, H. J.; Barden, C. J.; Weaver, D. "The Blood-Brain Barrier (BBB) Score" J. Med.

Chem. 2019, 62 (21), 9824-9836.

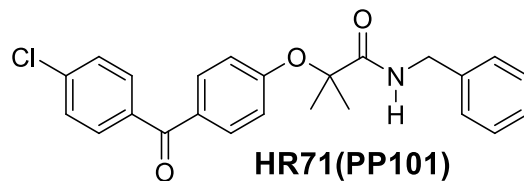

| Calc. | MarvinSketch |      | IP | RB | HLB  | logS          | PL    | MPA   | MSA    | HBA | MR     | hERG <sub>AM</sub> | hERG <sub>CM</sub> |
|-------|--------------|------|----|----|------|---------------|-------|-------|--------|-----|--------|--------------------|--------------------|
|       |              | T0   | NA | 7  | 3.80 | -<br>6.9<br>2 | 44.52 | 49.64 | 582.41 | 6   | 114.52 | 5.34               | safe               |
| ClogP | 5.50         | 0.00 |    |    |      |               |       |       |        |     |        |                    |                    |
| ClogD | 5.50         | 0.00 |    |    |      |               |       |       |        |     |        |                    |                    |
| MW    | 407.89       | 0.66 |    |    |      |               |       |       |        |     |        |                    |                    |
| PSA   | 55.40        | 1.00 |    |    |      |               |       |       |        |     |        |                    |                    |
| HBD   | 1.00         | 0.75 |    |    |      |               |       |       |        |     |        |                    |                    |
| pKa   | 2.70         | 1.00 |    |    |      |               |       |       |        |     |        |                    |                    |
| MPO   | 3.41         |      |    |    |      |               |       |       |        |     |        |                    |                    |
| BBB   | 4.70         |      |    |    |      |               |       |       |        |     |        |                    |                    |
| LogBB | 0.15         |      |    |    |      |               |       |       |        |     |        |                    |                    |

IP = Isoelectric Point; RB = Number of rotatable bonds; HLB = hydrophilic-lipophilic balance; logS = water solubility; PL = polarizability(Å<sup>3</sup>); Minimal Projection Area (Å<sup>2</sup>); MSA = molecular surface area; HBA = hydrogen bond acceptors; MR = Molar refractivity; ClogD = distribution at pKa; PSA = polar surface area; HBD = hydrogen bond donors; pKa = estimated acid strength; MPO = score for CNS penetration; LogBB = blood-brain distribution (0.152ClogP – 0.0148PSA + 0.138); hERG = estimated pIC50

(pAct) value for hERG (the human ether-a-go-go (hERG) ion channel); hERG<sub>AM</sub> = hERG activity model; hERG<sub>CM</sub> = hERG classification model

| BBB Score Calculator |       |                |
|----------------------|-------|----------------|
| Property             | Value | T <sub>0</sub> |
| ARO_R_SCORE          | 3     | 0.69           |
| HA_SCORE             | 29.00 | 0.79           |
| HWHBN_SCORE          | 0.20  | 1.00           |
| TPSA_SCORE           | 55.40 | 0.61           |
| PKA_SCORE            | 8.81  | 1.00           |
| BBB_SCORE            |       | 4.70           |

ARO\_R\_SCORE = Number of aromatic rings; HA\_SCORE = Number of heavy atoms.

MWHNM\_SCORE =  $[-0.5MW(HBA+HBD)]$  where MW = molecular weight, HBA = number of hydrogen bond acceptor sites, and HBD = number of hydrogen bond donors;

TPSA = topological polar surface area; PKA\_SCORE = Acidity strength. Gupta, M.;

Lee, H. J.; Barden, C. J.; Weaver, D. "The Blood-Brain Barrier (BBB) Score" J. Med.

Chem. 2019, 62 (21), 9824-9836.



**HR72(PP103)**

| Calc. | MarvinSketch |      | IP   | RB | HLB  | logS      | PL    | MPA   | MSA    | HBA | MR     | hERG <sub>AM</sub> | hERG <sub>CM</sub> |
|-------|--------------|------|------|----|------|-----------|-------|-------|--------|-----|--------|--------------------|--------------------|
|       |              | T0   | 8.23 | 7  | 5.41 | -<br>5.97 | 43.63 | 53.16 | 575.97 | 4   | 111.85 | 5.28               | safe               |
| ClogP | 4.36         | 0.32 |      |    |      |           |       |       |        |     |        |                    |                    |
| ClogD | 4.36         | 0.00 |      |    |      |           |       |       |        |     |        |                    |                    |
| MW    | 408.88       | 0.65 |      |    |      |           |       |       |        |     |        |                    |                    |
| PSA   | 68.29        | 1.00 |      |    |      |           |       |       |        |     |        |                    |                    |
| HBD   | 1.00         | 0.75 |      |    |      |           |       |       |        |     |        |                    |                    |
| pKa   | 4.16         | 1.00 |      |    |      |           |       |       |        |     |        |                    |                    |
| MPO   | 3.72         |      |      |    |      |           |       |       |        |     |        |                    |                    |
| BBB   | 4.47         |      |      |    |      |           |       |       |        |     |        |                    |                    |
| LogBB | -0.21        |      |      |    |      |           |       |       |        |     |        |                    |                    |

IP = Isoelectric Point; RB = Number of rotatable bonds; HLB = hydrophilic-lipophilic balance; logS = water solubility; PL = polarizability( $\text{\AA}^3$ ); Minimal Projection Area ( $\text{\AA}^2$ ); MSA = molecular surface area; HBA = hydrogen bond acceptors; MR = Molar refractivity; ClogD = distribution at pKa; PSA = polar surface area; HBD = hydrogen bond donors; pKa = estimated acid strength; MPO = score for CNS penetration; LogBB = blood-brain distribution ( $0.152\text{ClogP} - 0.0148\text{PSA} + 0.138$ ); hERG = estimated pIC50 (pAct) value for hERG (the human ether-a-go-go (hERG) ion channel); hERG<sub>AM</sub> = hERG activity model; hERG<sub>CM</sub> = hERG classification model

| BBB Score Calculator |       |                |
|----------------------|-------|----------------|
| Property             | Value | T <sub>0</sub> |
| ARO_R_SCORE          | 3     | 0.69           |
| HA_SCORE             | 29    | 0.79           |
| HWHBN_SCORE          | 0.25  | 0.96           |
| TPSA_SCORE           | 68.29 | 0.52           |
| PKA_SCORE            | 8.81  | 1.00           |
| BBB_SCORE            |       | 4.47           |

ARO\_R\_SCORE = Number of aromatic rings; HA\_SCORE = Number of heavy atoms.

MWHNM\_SCORE =  $[-0.5MW(HBA+HBD)]$  where MW = molecular weight, HBA = number of hydrogen bond acceptor sites, and HBD = number of hydrogen bond donors;

TPSA = topological polar surface area; PKA\_SCORE = Acidity strength. Gupta, M.;

Lee, H. J.; Barden, C. J.; Weaver, D. "The Blood-Brain Barrier (BBB) Score" J. Med.

Chem. 2019, 62 (21), 9824-9836.

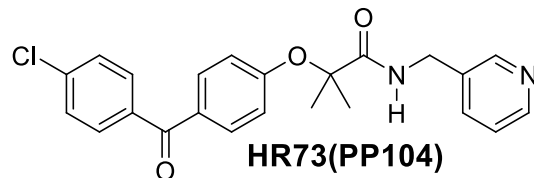

| Calc. | MarvinSketch |      | IP   | RB | HLB  | logS      | PL    | MPA   | MSA    | HBA | MR     | hERG <sub>AM</sub> | hERG <sub>CM</sub> |
|-------|--------------|------|------|----|------|-----------|-------|-------|--------|-----|--------|--------------------|--------------------|
|       |              | T0   | 8.87 | 7  | 5.43 | -<br>5.74 | 43.63 | 51.36 | 575.34 | 7   | 112.37 | 5.24               | safe               |
| ClogP | 4.28         | 0.36 |      |    |      |           |       |       |        |     |        |                    |                    |
| ClogD | 4.28         | 0.00 |      |    |      |           |       |       |        |     |        |                    |                    |
| MW    | 408.88       | 0.65 |      |    |      |           |       |       |        |     |        |                    |                    |
| PSA   | 68.29        | 1.00 |      |    |      |           |       |       |        |     |        |                    |                    |
| HBD   | 1.00         | 0.75 |      |    |      |           |       |       |        |     |        |                    |                    |
| pKa   | 4.82         | 1.00 |      |    |      |           |       |       |        |     |        |                    |                    |
| MPO   | 3.76         |      |      |    |      |           |       |       |        |     |        |                    |                    |
| BBB   | 4.47         |      |      |    |      |           |       |       |        |     |        |                    |                    |
| LogBB | -0.22        |      |      |    |      |           |       |       |        |     |        |                    |                    |

IP = Isoelectric Point; RB = Number of rotatable bonds; HLB = hydrophilic-lipophilic balance; logS = water solubility; PL = polarizability( $\text{\AA}^3$ ); Minimal Projection Area ( $\text{\AA}^2$ ); MSA = molecular surface area; HBA = hydrogen bond acceptors; MR = Molar refractivity; ClogD = distribution at pKa; PSA = polar surface area; HBD = hydrogen bond donors; pKa = estimated acid strength; MPO = score for CNS penetration; LogBB = blood-brain distribution ( $0.152\text{ClogP} - 0.0148\text{PSA} + 0.138$ ); hERG = estimated pIC50 (pAct) value for hERG (the human ether-a-go-go (hERG) ion channel); hERG<sub>AM</sub> = hERG activity model; hERG<sub>CM</sub> = hERG classification model

| BBB Score Calculator |       |                |
|----------------------|-------|----------------|
| Property             | Value | T <sub>0</sub> |
| ARO_R_SCORE          | 3     | 0.69           |
| HA_SCORE             | 29    | 0.79           |
| HWHBN_SCORE          | 0.25  | 0.96           |
| TPSA_SCORE           | 68.29 | 0.52           |
| PKA_SCORE            | 8.81  | 1.00           |
| BBB_SCORE            |       | 4.47           |

ARO\_R\_SCORE = Number of aromatic rings; HA\_SCORE = Number of heavy atoms.

MWHNM\_SCORE =  $[-0.5MW(HBA+HBD)]$  where MW = molecular weight, HBA = number of hydrogen bond acceptor sites, and HBD = number of hydrogen bond donors;

TPSA = topological polar surface area; PKA\_SCORE = Acidity strength. Gupta, M.;

Lee, H. J.; Barden, C. J.; Weaver, D. "The Blood-Brain Barrier (BBB) Score" J. Med.

Chem. 2019, 62 (21), 9824-9836.

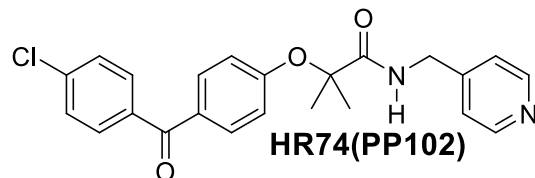

| Calc. | MarvinSketch | IP   | RB | HLB  | logS      | PL    | MPA   | MSA    | HBA | MR     | hERG <sub>AM</sub> | hERG <sub>CM</sub> |
|-------|--------------|------|----|------|-----------|-------|-------|--------|-----|--------|--------------------|--------------------|
|       | T0           | 8.99 | 7  | 5.43 | -<br>5.74 | 43.63 | 51.47 | 575.38 | 7   | 112.37 | 5.27               | safe               |
| ClogP | 4.28         | 0.36 |    |      |           |       |       |        |     |        |                    |                    |
| ClogD | 4.28         | 0.00 |    |      |           |       |       |        |     |        |                    |                    |
| MW    | 408.88       | 0.65 |    |      |           |       |       |        |     |        |                    |                    |
| PSA   | 68.29        | 1.00 |    |      |           |       |       |        |     |        |                    |                    |
| HBD   | 1.00         | 0.75 |    |      |           |       |       |        |     |        |                    |                    |
| pKa   | 5.02         | 1.00 |    |      |           |       |       |        |     |        |                    |                    |
| MPO   | 3.76         |      |    |      |           |       |       |        |     |        |                    |                    |
| BBB   | 4.14         |      |    |      |           |       |       |        |     |        |                    |                    |
| LogBB | -0.22        |      |    |      |           |       |       |        |     |        |                    |                    |

IP = Isoelectric Point; RB = Number of rotatable bonds; HLB = hydrophilic-lipophilic balance; logS = water solubility; PL = polarizability( $\text{\AA}^3$ ); Minimal Projection Area ( $\text{\AA}^2$ ); MSA = molecular surface area; HBA = hydrogen bond acceptors; MR = Molar refractivity; ClogD = distribution at pKa; PSA = polar surface area; HBD = hydrogen bond donors; pKa = estimated acid strength; MPO = score for CNS penetration; LogBB = blood-brain distribution ( $0.152\text{ClogP} - 0.0148\text{PSA} + 0.138$ ); hERG = estimated pIC50 (pAct) value for hERG (the human ether-a-go-go (hERG) ion channel); hERG<sub>AM</sub> = hERG activity model; hERG<sub>CM</sub> = hERG classification model

| BBB Score Calculator |       |                |
|----------------------|-------|----------------|
| Property             | Value | T <sub>0</sub> |
| ARO_R_SCORE          | 3     | 0.69           |
| HA_SCORE             | 29    | 0.79           |
| HWHBN_SCORE          | 0.25  | 0.96           |
| TPSA_SCORE           | 68.29 | 0.52           |
| PKA_SCORE            | 5.02  | 0.34           |
| BBB_SCORE            |       | 4.14           |

ARO\_R\_SCORE = Number of aromatic rings; HA\_SCORE = Number of heavy atoms.

MWHNM\_SCORE =  $[-0.5MW(HBA+HBD)]$  where MW = molecular weight, HBA = number of hydrogen bond acceptor sites, and HBD = number of hydrogen bond donors;

TPSA = topological polar surface area; PKA\_SCORE = Acidity strength. Gupta, M.;

Lee, H. J.; Barden, C. J.; Weaver, D. "The Blood-Brain Barrier (BBB) Score" J. Med.

Chem. 2019, 62 (21), 9824-9836.

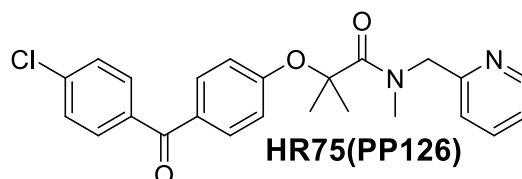

| Calc. | MarvinSketch |      | IP | RB | HLB  | logS      | PL    | MPA   | MSA    | HBA | MR     | hERG <sub>AM</sub> | hERG <sub>CM</sub> |
|-------|--------------|------|----|----|------|-----------|-------|-------|--------|-----|--------|--------------------|--------------------|
|       |              | T0   | NA | 7  | 5.56 | -<br>5.91 | 45.47 | 57.15 | 608.71 | 7   | 116.74 | 5.35               | safe               |
| ClogP | 4.59         | 0.21 |    |    |      |           |       |       |        |     |        |                    |                    |
| ClogD | 4.59         | 0.00 |    |    |      |           |       |       |        |     |        |                    |                    |
| MW    | 422.91       | 0.55 |    |    |      |           |       |       |        |     |        |                    |                    |
| PSA   | 59.50        | 1.00 |    |    |      |           |       |       |        |     |        |                    |                    |
| HBD   | 0.00         | 1.00 |    |    |      |           |       |       |        |     |        |                    |                    |
| pKa   | 4.21         | 1.00 |    |    |      |           |       |       |        |     |        |                    |                    |
| MPO   | 3.76         |      |    |    |      |           |       |       |        |     |        |                    |                    |
| BBB   | 4.60         |      |    |    |      |           |       |       |        |     |        |                    |                    |
| LogBB | -0.04        |      |    |    |      |           |       |       |        |     |        |                    |                    |

IP = Isoelectric Point; RB = Number of rotatable bonds; HLB = hydrophilic-lipophilic

balance; logS = water solubility; PL = polarizability( $\text{\AA}^3$ ); Minimal Projection Area ( $\text{\AA}^2$ );

MSA = molecular surface area; HBA = hydrogen bond acceptors; MR = Molar

refractivity; ClogD = distribution at pKa; PSA = polar surface area; HBD = hydrogen

bond donors; pKa = estimated acid strength; MPO = score for CNS penetration; LogBB

= blood-brain distribution ( $0.152\text{ClogP} - 0.0148\text{PSA} + 0.138$ ); hERG = estimated pIC50

(pAct) value for hERG (the human ether-a-go-go (hERG) ion channel); hERG<sub>AM</sub> = hERG activity model; hERG<sub>CM</sub> = hERG classification model

| BBB Score Calculator |       |                |
|----------------------|-------|----------------|
| Property             | Value | T <sub>0</sub> |
| ARO_R_SCORE          | 3     | 0.69           |
| HA_SCORE             | 30    | 0.75           |
| HWHBN_SCORE          | 0.19  | 1.00           |
| TPSA_SCORE           | 59.50 | 0.58           |
| PKA_SCORE            | 8.81  | 1.00           |
| BBB_SCORE            |       | 4.60           |

ARO\_R\_SCORE = Number of aromatic rings; HA\_SCORE = Number of heavy atoms.

MWHNM\_SCORE =  $[-0.5MW(HBA+HBD)]$  where MW = molecular weight, HBA = number of hydrogen bond acceptor sites, and HBD = number of hydrogen bond donors;

TPSA = topological polar surface area; PKA\_SCORE = Acidity strength. Gupta, M.;

Lee, H. J.; Barden, C. J.; Weaver, D. "The Blood-Brain Barrier (BBB) Score" J. Med.

Chem. 2019, 62 (21), 9824-9836.

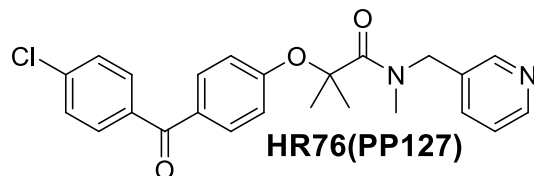

| Calc. | MarvinSketch | IP   | RB | HLB | logS | PL | MPA   | MSA   | HBA    | MR | hERG <sub>AM</sub> | hERG <sub>CM</sub> |      |
|-------|--------------|------|----|-----|------|----|-------|-------|--------|----|--------------------|--------------------|------|
|       |              | T0   | NA | 7   | 5.58 | -  | 45.47 | 57.81 | 608.06 | 7  | 117.26             | 5.41               | safe |
|       |              |      |    |     | 5.77 |    |       |       |        |    |                    |                    |      |
| ClogP | 4.51         | 0.25 |    |     |      |    |       |       |        |    |                    |                    |      |
| ClogD | 4.50         | 0.00 |    |     |      |    |       |       |        |    |                    |                    |      |
| MW    | 422.91       | 0.55 |    |     |      |    |       |       |        |    |                    |                    |      |
| PSA   | 59.50        | 1.00 |    |     |      |    |       |       |        |    |                    |                    |      |
| HBD   | 0.00         | 1.00 |    |     |      |    |       |       |        |    |                    |                    |      |
| pKa   | 4.83         | 1.00 |    |     |      |    |       |       |        |    |                    |                    |      |
| MPO   | 3.80         |      |    |     |      |    |       |       |        |    |                    |                    |      |
| BBB   | 4.60         |      |    |     |      |    |       |       |        |    |                    |                    |      |
| LogBB | -0.06        |      |    |     |      |    |       |       |        |    |                    |                    |      |

IP = Isoelectric Point; RB = Number of rotatable bonds; HLB = hydrophilic-lipophilic balance; logS = water solubility; PL = polarizability( $\text{\AA}^3$ ); Minimal Projection Area ( $\text{\AA}^2$ ); MSA = molecular surface area; HBA = hydrogen bond acceptors; MR = Molar refractivity; ClogD = distribution at pKa; PSA = polar surface area; HBD = hydrogen

bond donors; pKa = estimated acid strength; MPO = score for CNS penetration; LogBB = blood-brain distribution ( $0.152\text{ClogP} - 0.0148\text{PSA} + 0.138$ ); hERG = estimated pIC50 (pAct) value for hERG (the human ether-a-go-go (hERG) ion channel); hERG<sub>AM</sub> = hERG activity model; hERG<sub>CM</sub> = hERG classification model

| BBB Score Calculator |       |                |
|----------------------|-------|----------------|
| Property             | Value | T <sub>0</sub> |
| ARO_R_SCORE          | 3     | 0.69           |
| HA_SCORE             | 30    | 0.75           |
| HWHBN_SCORE          | 0.19  | 1.00           |
| TPSA_SCORE           | 59.50 | 0.58           |
| PKA_SCORE            | 8.81  | 1.00           |
| BBB_SCORE            |       | 4.60           |

ARO\_R\_SCORE = Number of aromatic rings; HA\_SCORE = Number of heavy atoms.

MWHNM\_SCORE =  $[-0.5\text{MW}(\text{HBA}+\text{HBD})]$  where MW = molecular weight, HBA = number of hydrogen bond acceptor sites, and HBD = number of hydrogen bond donors;

TPSA = topological polar surface area; PKA\_SCORE = Acidity strength. Gupta, M.;

Lee, H. J.; Barden, C. J.; Weaver, D. "The Blood-Brain Barrier (BBB) Score" J. Med.

Chem. 2019, 62 (21), 9824-9836.

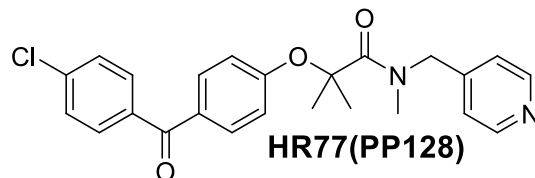

| Calc. | MarvinSketch | IP   | RB | HLB  | logS      | PL    | MPA   | MSA    | HBA | MR     | hERG <sub>AM</sub> | hERG <sub>CM</sub> |
|-------|--------------|------|----|------|-----------|-------|-------|--------|-----|--------|--------------------|--------------------|
|       | T0           | NA   | 7  | 5.58 | -<br>5.77 | 45.47 | 56.93 | 608.63 | 7   | 117.26 | 5.42               | safe               |
| ClogP | 4.51         | 0.25 |    |      |           |       |       |        |     |        |                    |                    |
| ClogD | 4.50         | 0.00 |    |      |           |       |       |        |     |        |                    |                    |
| MW    | 422.91       | 0.55 |    |      |           |       |       |        |     |        |                    |                    |
| PSA   | 59.50        | 1.00 |    |      |           |       |       |        |     |        |                    |                    |
| HBD   | 0.00         | 1.00 |    |      |           |       |       |        |     |        |                    |                    |
| pKa   | 5.03         | 1.00 |    |      |           |       |       |        |     |        |                    |                    |
| MPO   | 3.80         |      |    |      |           |       |       |        |     |        |                    |                    |
| BBB   | 4.27         |      |    |      |           |       |       |        |     |        |                    |                    |
| LogBB | -0.06        |      |    |      |           |       |       |        |     |        |                    |                    |

IP = Isoelectric Point; RB = Number of rotatable bonds; HLB = hydrophilic-lipophilic balance; logS = water solubility; PL = polarizability( $\text{\AA}^3$ ); Minimal Projection Area ( $\text{\AA}^2$ ); MSA = molecular surface area; HBA = hydrogen bond acceptors; MR = Molar refractivity; ClogD = distribution at pKa; PSA = polar surface area; HBD = hydrogen bond donors; pKa = estimated acid strength; MPO = score for CNS penetration; LogBB = blood-brain distribution ( $0.152\text{ClogP} - 0.0148\text{PSA} + 0.138$ ); hERG = estimated pIC50 (pAct) value for hERG (the human ether-a-go-go (hERG) ion channel); hERG<sub>AM</sub> = hERG activity model; hERG<sub>CM</sub> = hERG classification model

| BBB Score Calculator |       |                |
|----------------------|-------|----------------|
| Property             | Value | T <sub>0</sub> |
| ARO_R_SCORE          | 3     | 0.69           |
| HA_SCORE             | 30    | 0.75           |
| HWHBN_SCORE          | 0.19  | 1.00           |
| TPSA_SCORE           | 59.50 | 0.58           |
| PKA_SCORE            | 5.03  | 0.34           |
| BBB_SCORE            |       | 4.27           |

ARO\_R\_SCORE = Number of aromatic rings; HA\_SCORE = Number of heavy atoms.

MWHNM\_SCORE =  $[-0.5MW(HBA+HBD)]$  where MW = molecular weight, HBA = number of hydrogen bond acceptor sites, and HBD = number of hydrogen bond donors;

TPSA = topological polar surface area; PKA\_SCORE = Acidity strength. Gupta, M.;

Lee, H. J.; Barden, C. J.; Weaver, D. "The Blood-Brain Barrier (BBB) Score" J. Med.

Chem. 2019, 62 (21), 9824-9836.

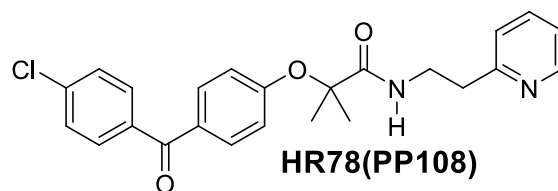

| Calc. | MarvinSketch |      | IP   | RB | HLB  | logS      | PL    | MPA   | MSA    | HBA | MR     | hERG <sub>AM</sub> | hERG <sub>CM</sub> |
|-------|--------------|------|------|----|------|-----------|-------|-------|--------|-----|--------|--------------------|--------------------|
|       |              | T0   | 9.50 | 8  | 5.01 | -<br>5.97 | 45.47 | 48.71 | 606.38 | 7   | 116.55 | 5.34               | Safe               |
| ClogP | 4.60         | 0.20 |      |    |      |           |       |       |        |     |        |                    |                    |
| ClogD | 4.60         | 0.00 |      |    |      |           |       |       |        |     |        |                    |                    |
| MW    | 422.91       | 0.55 |      |    |      |           |       |       |        |     |        |                    |                    |
| PSA   | 68.29        | 1.00 |      |    |      |           |       |       |        |     |        |                    |                    |
| HBD   | 1.00         | 0.75 |      |    |      |           |       |       |        |     |        |                    |                    |
| pKa   | 4.55         | 1.00 |      |    |      |           |       |       |        |     |        |                    |                    |
| MPO   | 3.50         |      |      |    |      |           |       |       |        |     |        |                    |                    |
| BBB   | 4.44         |      |      |    |      |           |       |       |        |     |        |                    |                    |
| LogBB | -0.17        |      |      |    |      |           |       |       |        |     |        |                    |                    |

IP = Isoelectric Point; RB = Number of rotatable bonds; HLB = hydrophilic-lipophilic balance; logS = water solubility; PL = polarizability( $\text{\AA}^3$ ); Minimal Projection Area ( $\text{\AA}^2$ ); MSA = molecular surface area; HBA = hydrogen bond acceptors; MR = Molar refractivity; ClogD = distribution at pKa; PSA = polar surface area; HBD = hydrogen bond donors; pKa = estimated acid strength; MPO = score for CNS penetration; LogBB

= blood-brain distribution ( $0.152\text{ClogP} - 0.0148\text{PSA} + 0.138$ ); hERG = estimated pIC50 (pAct) value for hERG (the human ether-a-go-go (hERG) ion channel); hERG<sub>AM</sub> = hERG activity model; hERG<sub>CM</sub> = hERG classification model

| BBB Score Calculator |       |                |
|----------------------|-------|----------------|
| Property             | Value | T <sub>0</sub> |
| ARO_R_SCORE          | 3     | 0.69           |
| HA_SCORE             | 30    | 0.75           |
| HWHBN_SCORE          | 0.24  | 0.97           |
| TPSA_SCORE           | 68.29 | 0.52           |
| PKA_SCORE            | 8.81  | 1.00           |
| BBB_SCORE            | 4.44  |                |

ARO\_R\_SCORE = Number of aromatic rings; HA\_SCORE = Number of heavy atoms.

MWHNM\_SCORE =  $[-0.5\text{MW}(\text{HBA}+\text{HBD})]$  where MW = molecular weight, HBA = number of hydrogen bond acceptor sites, and HBD = number of hydrogen bond donors;

TPSA = topological polar surface area; PKA\_SCORE = Acidity strength. Gupta, M.;

Lee, H. J.; Barden, C. J.; Weaver, D. "The Blood-Brain Barrier (BBB) Score" J. Med.

Chem. 2019, 62 (21), 9824-9836.

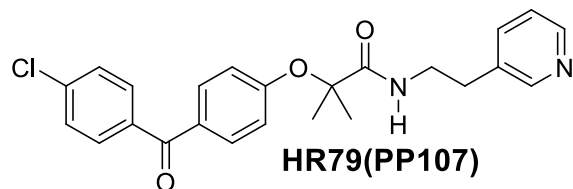

| Calc. | MarvinSketch |      | IP   | RB | HLB  | logS  | PL    | MPA   | MSA    | HBA | MR     | hERG <sub>AM</sub> | hERG <sub>CM</sub> |
|-------|--------------|------|------|----|------|-------|-------|-------|--------|-----|--------|--------------------|--------------------|
|       |              | T0   | 9.68 | 8  | 5.03 | -5.74 | 45.47 | 46.89 | 605.78 | 7   | 117.12 | 5.39               | safe               |
| ClogP | 4.57         | 0.21 |      |    |      |       |       |       |        |     |        |                    |                    |
| ClogD | 4.57         | 0.00 |      |    |      |       |       |       |        |     |        |                    |                    |
| MW    | 422.91       | 0.55 |      |    |      |       |       |       |        |     |        |                    |                    |
| PSA   | 68.29        | 1.00 |      |    |      |       |       |       |        |     |        |                    |                    |
| HBD   | 1.00         | 0.75 |      |    |      |       |       |       |        |     |        |                    |                    |
| pKa   | 4.93         | 1.00 |      |    |      |       |       |       |        |     |        |                    |                    |
| MPO   | 3.52         |      |      |    |      |       |       |       |        |     |        |                    |                    |
| BBB   | 4.44         |      |      |    |      |       |       |       |        |     |        |                    |                    |
| LogBB | -0.18        |      |      |    |      |       |       |       |        |     |        |                    |                    |

IP = Isoelectric Point; RB = Number of rotatable bonds; HLB = hydrophilic-lipophilic balance; logS = water solubility; PL = polarizability( $\text{\AA}^3$ ); Minimal Projection Area ( $\text{\AA}^2$ ); MSA = molecular surface area; HBA = hydrogen bond acceptors; MR = Molar refractivity; ClogD = distribution at pKa; PSA = polar surface area; HBD = hydrogen bond donors; pKa = estimated acid strength; MPO = score for CNS penetration; LogBB = blood-brain distribution ( $0.152\text{ClogP} - 0.0148\text{PSA} + 0.138$ ); hERG = estimated pIC50 (pAct) value for hERG (the human ether-a-go-go (hERG) ion channel); hERG<sub>AM</sub> = hERG activity model; hERG<sub>CM</sub> = hERG classification model

| BBB Score Calculator |       |                |
|----------------------|-------|----------------|
| Property             | Value | T <sub>0</sub> |
| ARO_R_SCORE          | 3     | 0.69           |
| HA_SCORE             | 30    | 0.75           |
| HWHBN_SCORE          | 0.24  | 0.97           |
| TPSA_SCORE           | 68.29 | 0.52           |
| PKA_SCORE            | 8.81  | 1.00           |
| BBB_SCORE            |       | 4.44           |

ARO\_R\_SCORE = Number of aromatic rings; HA\_SCORE = Number of heavy atoms.

MWHNM\_SCORE =  $[-0.5MW(HBA+HBD)]$  where MW = molecular weight, HBA = number of hydrogen bond acceptor sites, and HBD = number of hydrogen bond donors;

TPSA = topological polar surface area; PKA\_SCORE = Acidity strength. Gupta, M.;

Lee, H. J.; Barden, C. J.; Weaver, D. "The Blood-Brain Barrier (BBB) Score" J. Med.

Chem. 2019, 62 (21), 9824-9836.

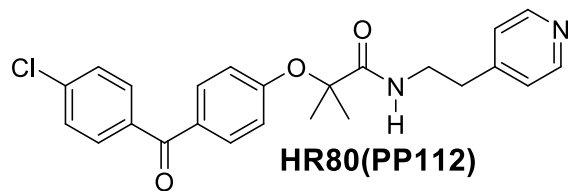

| Calc. | MarvinSketch | IP   | RB | HLB  | logS          | PL    | MPA   | MSA    | HBA | MR     | hERG <sub>AM</sub> | hERG <sub>CM</sub> |
|-------|--------------|------|----|------|---------------|-------|-------|--------|-----|--------|--------------------|--------------------|
|       | T0           | 9.75 | 8  | 5.03 | -<br>5.7<br>4 | 45.47 | 49.21 | 605.22 | 7   | 117.12 | 5.45               | TOXIC              |
| ClogP | 4.57         | 0.21 |    |      |               |       |       |        |     |        |                    |                    |
| ClogD | 4.57         | 0.00 |    |      |               |       |       |        |     |        |                    |                    |
| MW    | 422.91       | 0.55 |    |      |               |       |       |        |     |        |                    |                    |
| PSA   | 68.29        | 1.00 |    |      |               |       |       |        |     |        |                    |                    |
| HBD   | 1.00         | 0.75 |    |      |               |       |       |        |     |        |                    |                    |
| pKa   | 5.05         | 1.00 |    |      |               |       |       |        |     |        |                    |                    |
| MPO   | 3.52         |      |    |      |               |       |       |        |     |        |                    |                    |
| BBB   | 4.11         |      |    |      |               |       |       |        |     |        |                    |                    |
| LogBB | -0.18        |      |    |      |               |       |       |        |     |        |                    |                    |

IP = Isoelectric Point; RB = Number of rotatable bonds; HLB = hydrophilic-lipophilic balance; logS = water solubility; PL = polarizability( $\text{\AA}^3$ ); Minimal Projection Area ( $\text{\AA}^2$ ); MSA = molecular surface area; HBA = hydrogen bond acceptors; MR = Molar refractivity; ClogD = distribution at pKa; PSA = polar surface area; HBD = hydrogen bond donors; pKa = estimated acid strength; MPO = score for CNS penetration; LogBB = blood-brain distribution ( $0.152\text{ClogP} - 0.0148\text{PSA} + 0.138$ ); hERG = estimated pIC50 (pAct) value for hERG (the human ether-a-go-go (hERG) ion channel); hERG<sub>AM</sub> = hERG activity model; hERG<sub>CM</sub> = hERG classification model

| BBB Score Calculator |       |                |
|----------------------|-------|----------------|
| Property             | Value | T <sub>0</sub> |
| ARO_R_SCORE          | 3     | 0.69           |
| HA_SCORE             | 30    | 0.75           |
| HWHBN_SCORE          | 0.24  | 0.97           |
| TPSA_SCORE           | 68.29 | 0.52           |
| PKA_SCORE            | 5.05  | 0.35           |
| BBB_SCORE            |       | 4.11           |

ARO\_R\_SCORE = Number of aromatic rings; HA\_SCORE = Number of heavy atoms.

MWHNM\_SCORE =  $[-0.5\text{MW}(\text{HBA}+\text{HBD})]$  where MW = molecular weight, HBA = number of hydrogen bond acceptor sites, and HBD = number of hydrogen bond donors;

TPSA = topological polar surface area; PKA\_SCORE = Acidity strength. Gupta, M.;

Lee, H. J.; Barden, C. J.; Weaver, D. "The Blood-Brain Barrier (BBB) Score" J. Med.

Chem. 2019, 62 (21), 9824-9836.



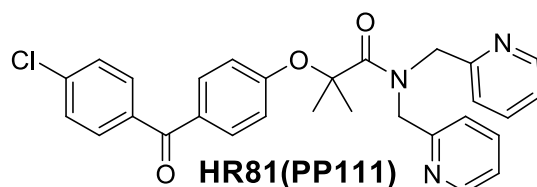

| Calc. | MarvinSketch | IP   | RB | HLB | logS | PL | MPA   | MSA   | HBA    | MR | hERG <sub>AM</sub> | hERG <sub>CM</sub> |      |
|-------|--------------|------|----|-----|------|----|-------|-------|--------|----|--------------------|--------------------|------|
|       |              | TO   | NA | 9   | 4.76 | -  | 54.16 | 77.69 | 707.76 | 8  | 138.68             | 5.24               | safe |
|       |              |      |    |     | 6.41 |    |       |       |        |    |                    |                    |      |
| ClogP | 5.18         | 0.00 |    |     |      |    |       |       |        |    |                    |                    |      |
| ClogD | 5.17         | 0.00 |    |     |      |    |       |       |        |    |                    |                    |      |
| MW    | 500.00       | 0.00 |    |     |      |    |       |       |        |    |                    |                    |      |
| PSA   | 72.39        | 1.00 |    |     |      |    |       |       |        |    |                    |                    |      |
| HBD   | 0.00         | 1.00 |    |     |      |    |       |       |        |    |                    |                    |      |
| pKa   | 4.49         | 1.00 |    |     |      |    |       |       |        |    |                    |                    |      |
| MPO   | 3.00         |      |    |     |      |    |       |       |        |    |                    |                    |      |
| BBB   | 3.66         |      |    |     |      |    |       |       |        |    |                    |                    |      |
| LogBB | -0.15        |      |    |     |      |    |       |       |        |    |                    |                    |      |

IP = Isoelectric Point; RB = Number of rotatable bonds; HLB = hydrophilic-lipophilic balance; logS = water solubility; PL = polarizability( $\text{\AA}^3$ ); Minimal Projection Area ( $\text{\AA}^2$ ); MSA = molecular surface area; HBA = hydrogen bond acceptors; MR = Molar refractivity; ClogD = distribution at pKa; PSA = polar surface area; HBD = hydrogen

bond donors; pKa = estimated acid strength; MPO = score for CNS penetration; LogBB = blood-brain distribution ( $0.152\text{ClogP} - 0.0148\text{PSA} + 0.138$ ); hERG = estimated pIC50 (pAct) value for hERG (the human ether-a-go-go (hERG) ion channel); hERG<sub>AM</sub> = hERG activity model; hERG<sub>CM</sub> = hERG classification model

| BBB Score Calculator |       |                |
|----------------------|-------|----------------|
| Property             | Value | T <sub>0</sub> |
| ARO_R_SCORE          | 4     | 0.20           |
| HA_SCORE             | 36    | 0.48           |
| HWHBN_SCORE          | 0.22  | 0.99           |
| TPSA_SCORE           | 72.39 | 0.49           |
| PKA_SCORE            | 8.81  | 1.00           |
| BBB_SCORE            |       | 3.66           |

ARO\_R\_SCORE = Number of aromatic rings; HA\_SCORE = Number of heavy atoms.

MWHNM\_SCORE =  $[-0.5\text{MW}(\text{HBA}+\text{HBD})]$  where MW = molecular weight, HBA = number of hydrogen bond acceptor sites, and HBD = number of hydrogen bond donors;

TPSA = topological polar surface area; PKA\_SCORE = Acidity strength. Gupta, M.;

Lee, H. J.; Barden, C. J.; Weaver, D. "The Blood-Brain Barrier (BBB) Score" J. Med.

Chem. 2019, 62 (21), 9824-9836.

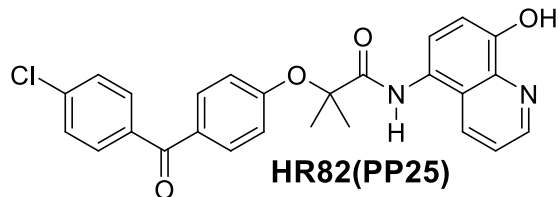

| Calc. | MarvinSketch |      | IP   | RB | HLB  | logS  | PL    | MPA   | MSA    | HBA | MR     | hERG <sub>AM</sub> | hERG <sub>CM</sub> |
|-------|--------------|------|------|----|------|-------|-------|-------|--------|-----|--------|--------------------|--------------------|
|       |              | T0   | 6.65 | 6  | 4.59 | -7.05 | 49.90 | 50.89 | 615.89 | 9   | 127.37 | 5.27               | safe               |
| ClogP | 5.65         | 0.00 |      |    |      |       |       |       |        |     |        |                    |                    |
| ClogD | 5.65         | 0.00 |      |    |      |       |       |       |        |     |        |                    |                    |
| MW    | 460.91       | 0.28 |      |    |      |       |       |       |        |     |        |                    |                    |
| PSA   | 88.52        | 1.00 |      |    |      |       |       |       |        |     |        |                    |                    |
| HBD   | 2.00         | 0.50 |      |    |      |       |       |       |        |     |        |                    |                    |
| pKa   | 4.53         | 1.00 |      |    |      |       |       |       |        |     |        |                    |                    |
| MPO   | 2.78         |      |      |    |      |       |       |       |        |     |        |                    |                    |
| BBB   | 3.21         |      |      |    |      |       |       |       |        |     |        |                    |                    |
| LogBB | -0.31        |      |      |    |      |       |       |       |        |     |        |                    |                    |

IP = Isoelectric Point; RB = Number of rotatable bonds; HLB = hydrophilic-lipophilic

balance; logS = water solubility; PL = polarizability( $\text{\AA}^3$ ); Minimal Projection Area ( $\text{\AA}^2$ );

MSA = molecular surface area; HBA = hydrogen bond acceptors; MR = Molar

refractivity; ClogD = distribution at pKa; PSA = polar surface area; HBD = hydrogen

bond donors; pKa = estimated acid strength; MPO = score for CNS penetration; LogBB

= blood-brain distribution ( $0.152\text{ClogP} - 0.0148\text{PSA} + 0.138$ ); hERG = estimated pIC50

(pAct) value for hERG (the human ether-a-go-go (hERG) ion channel); hERG<sub>AM</sub> =

hERG activity model; hERG<sub>CM</sub> = hERG classification model

| BBB Score Calculator |       |                |
|----------------------|-------|----------------|
| Property             | Value | T <sub>0</sub> |
| ARO_R_SCORE          | 4     | 0.20           |
| HA_SCORE             | 33    | 0.61           |
| HWHBN_SCORE          | 0.33  | 0.76           |
| TPSA_SCORE           | 88.52 | 0.38           |
| PKA_SCORE            | 8.81  | 1.00           |
| BBB_SCORE            |       | 3.21           |

ARO\_R\_SCORE = Number of aromatic rings; HA\_SCORE = Number of heavy atoms.

MWHNM\_SCORE =  $[-0.5MW(HBA+HBD)]$  where MW = molecular weight, HBA = number of hydrogen bond acceptor sites, and HBD = number of hydrogen bond donors;

TPSA = topological polar surface area; PKA\_SCORE = Acidity strength. Gupta, M.;

Lee, H. J.; Barden, C. J.; Weaver, D. "The Blood-Brain Barrier (BBB) Score" J. Med.

Chem. 2019, 62 (21), 9824-9836.

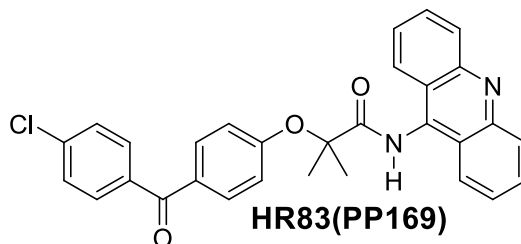

| Calc. | MarvinSketch | IP   | RB   | HLB | logS | PL    | MPA   | MSA   | HBA    | MR | hERG <sub>AM</sub> | hERG <sub>CM</sub> |      |
|-------|--------------|------|------|-----|------|-------|-------|-------|--------|----|--------------------|--------------------|------|
|       |              | T0   | 9.01 | 6   | 3.40 | -9.08 | 56.85 | 56.88 | 666.84 | 7  | 141.47             | 5.62               | Safe |
| ClogP | 7.33         | 0.00 |      |     |      |       |       |       |        |    |                    |                    |      |
| ClogD | 7.32         | 0.00 |      |     |      |       |       |       |        |    |                    |                    |      |
| MW    | 494.98       | 0.04 |      |     |      |       |       |       |        |    |                    |                    |      |
| PSA   | 68.29        | 1.00 |      |     |      |       |       |       |        |    |                    |                    |      |
| HBD   | 1.00         | 0.75 |      |     |      |       |       |       |        |    |                    |                    |      |
| pKa   | 5.55         | 1.00 |      |     |      |       |       |       |        |    |                    |                    |      |
| MPO   | 2.79         |      |      |     |      |       |       |       |        |    |                    |                    |      |
| BBB   | 3.25         |      |      |     |      |       |       |       |        |    |                    |                    |      |
| LogBB | 0.24         |      |      |     |      |       |       |       |        |    |                    |                    |      |

IP = Isoelectric Point; RB = Number of rotatable bonds; HLB = hydrophilic-lipophilic balance; logS = water solubility; PL = polarizability( $\text{\AA}^3$ ); Minimal Projection Area ( $\text{\AA}^2$ ); MSA = molecular surface area; HBA = hydrogen bond acceptors; MR = Molar refractivity; ClogD = distribution at pKa; PSA = polar surface area; HBD = hydrogen bond donors; pKa = estimated acid strength; MPO = score for CNS penetration; LogBB = blood-brain distribution ( $0.152\text{ClogP} - 0.0148\text{PSA} + 0.138$ ); hERG = estimated pIC<sub>50</sub> (pAct) value for hERG (the human ether-a-go-go (hERG) ion channel); hERG<sub>AM</sub> = hERG activity model; hERG<sub>CM</sub> = hERG classification model

| BBB Score Calculator |       |                |
|----------------------|-------|----------------|
| Property             | Value | T <sub>0</sub> |
| ARO_R_SCORE          | 5     | 0.00           |
| HA_SCORE             | 36    | 0.48           |
| HWHBN_SCORE          | 0.22  | 0.99           |
| TPSA_SCORE           | 68.29 | 0.52           |
| PKA_SCORE            | 5.55  | 0.48           |
| BBB_SCORE            |       | 3.25           |

ARO\_R\_SCORE = Number of aromatic rings; HA\_SCORE = Number of heavy atoms.

MWHNM\_SCORE =  $[-0.5MW(HBA+HBD)]$  where MW = molecular weight, HBA = number of hydrogen bond acceptor sites, and HBD = number of hydrogen bond donors;

TPSA = topological polar surface area; PKA\_SCORE = Acidity strength. Gupta, M.;

Lee, H. J.; Barden, C. J.; Weaver, D. "The Blood-Brain Barrier (BBB) Score" J. Med.

Chem. 2019, 62 (21), 9824-9836.

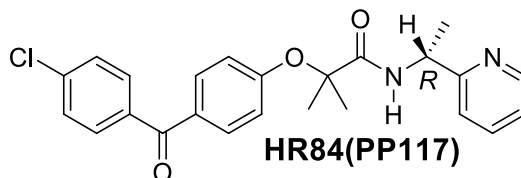

| Calc. | MarvinSketch | IP   | RB | HLB  | logS  | PL    | MPA   | MSA    | HBA | MR     | hERG <sub>AM</sub> | hERG <sub>CM</sub> |
|-------|--------------|------|----|------|-------|-------|-------|--------|-----|--------|--------------------|--------------------|
|       | T0           | 8.09 | 7  | 4.99 | -6.28 | 45.47 | 56.50 | 603.44 | 7   | 116.34 | 5.24               | Safe               |
| ClogP | 4.93         | 0.03 |    |      |       |       |       |        |     |        |                    |                    |
| ClogD | 4.93         | 0.00 |    |      |       |       |       |        |     |        |                    |                    |
| MW    | 422.91       | 0.55 |    |      |       |       |       |        |     |        |                    |                    |
| PSA   | 68.29        | 1.00 |    |      |       |       |       |        |     |        |                    |                    |
| HBD   | 1.00         | 0.75 |    |      |       |       |       |        |     |        |                    |                    |
| pKa   | 4.09         | 1.00 |    |      |       |       |       |        |     |        |                    |                    |
| MPO   | 3.33         |      |    |      |       |       |       |        |     |        |                    |                    |
| BBB   | 4.44         |      |    |      |       |       |       |        |     |        |                    |                    |
| LogBB | -0.12        |      |    |      |       |       |       |        |     |        |                    |                    |

IP = Isoelectric Point; RB = Number of rotatable bonds; HLB = hydrophilic-lipophilic

balance; logS = water solubility; PL = polarizability( $\text{\AA}^3$ ); Minimal Projection Area ( $\text{\AA}^2$ );

MSA = molecular surface area; HBA = hydrogen bond acceptors; MR = Molar

refractivity; ClogD = distribution at pKa; PSA = polar surface area; HBD = hydrogen

bond donors; pKa = estimated acid strength; MPO = score for CNS penetration; LogBB

= blood-brain distribution ( $0.152\text{ClogP} - 0.0148\text{PSA} + 0.138$ ); hERG = estimated pIC<sub>50</sub>

(pAct) value for hERG (the human ether-a-go-go (hERG) ion channel); hERG<sub>AM</sub> =

hERG activity model; hERG<sub>CM</sub> = hERG classification model

| BBB Score Calculator |       |                |
|----------------------|-------|----------------|
| Property             | Value | T <sub>0</sub> |
| ARO_R_SCORE          | 3     | 0.69           |
| HA_SCORE             | 30    | 0.75           |
| HWHBN_SCORE          | 0.24  | 0.97           |
| TPSA_SCORE           | 68.29 | 0.52           |
| PKA_SCORE            | 8.81  | 1.00           |
| BBB_SCORE            |       | 4.44           |

ARO\_R\_SCORE = Number of aromatic rings; HA\_SCORE = Number of heavy atoms.

MWHNM\_SCORE =  $[-0.5MW(HBA+HBD)]$  where MW = molecular weight, HBA = number of hydrogen bond acceptor sites, and HBD = number of hydrogen bond donors;

TPSA = topological polar surface area; PKA\_SCORE = Acidity strength. Gupta, M.;

Lee, H. J.; Barden, C. J.; Weaver, D. "The Blood-Brain Barrier (BBB) Score" J. Med.

Chem. 2019, 62 (21), 9824-9836.

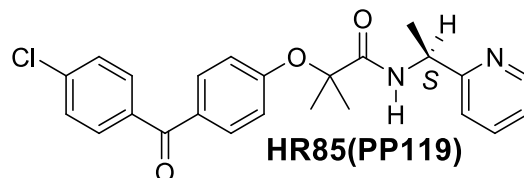

| Calc. | MarvinSketch | IP   | RB | HLB  | logS  | PL    | MPA   | MSA    | HBA | MR     | hERG <sub>AM</sub> | hERG <sub>CM</sub> |
|-------|--------------|------|----|------|-------|-------|-------|--------|-----|--------|--------------------|--------------------|
|       | T0           | 8.09 | 7  | 4.99 | -6.28 | 45.47 | 56.50 | 603.44 | 7   | 116.34 | 5.26               | safe               |
| ClogP | 4.93         | 0.03 |    |      |       |       |       |        |     |        |                    |                    |
| ClogD | 4.93         | 0.00 |    |      |       |       |       |        |     |        |                    |                    |
| MW    | 422.91       | 0.55 |    |      |       |       |       |        |     |        |                    |                    |
| PSA   | 68.29        | 1.00 |    |      |       |       |       |        |     |        |                    |                    |
| HBD   | 1.00         | 0.75 |    |      |       |       |       |        |     |        |                    |                    |
| pKa   | 4.09         | 1.00 |    |      |       |       |       |        |     |        |                    |                    |
| MPO   | 3.33         |      |    |      |       |       |       |        |     |        |                    |                    |
| BBB   | 4.44         |      |    |      |       |       |       |        |     |        |                    |                    |
| LogBB | -0.12        |      |    |      |       |       |       |        |     |        |                    |                    |

IP = Isoelectric Point; RB = Number of rotatable bonds; HLB = hydrophilic-lipophilic

balance; logS = water solubility; PL = polarizability( $\text{\AA}^3$ ); Minimal Projection Area ( $\text{\AA}^2$ );

MSA = molecular surface area; HBA = hydrogen bond acceptors; MR = Molar

refractivity; ClogD = distribution at pKa; PSA = polar surface area; HBD = hydrogen

bond donors; pKa = estimated acid strength; MPO = score for CNS penetration; LogBB

= blood-brain distribution ( $0.152\text{ClogP} - 0.0148\text{PSA} + 0.138$ ); hERG = estimated pIC<sub>50</sub>

(pAct) value for hERG (the human ether-a-go-go (hERG) ion channel); hERG<sub>AM</sub> =

hERG activity model; hERG<sub>CM</sub> = hERG classification model

| BBB Score Calculator |       |                |
|----------------------|-------|----------------|
| Property             | Value | T <sub>0</sub> |
| ARO_R_SCORE          | 3     | 0.69           |
| HA_SCORE             | 30    | 0.75           |
| HWHBN_SCORE          | 0.24  | 0.97           |
| TPSA_SCORE           | 68.29 | 0.52           |
| PKA_SCORE            | 8.81  | 1.00           |
| BBB_SCORE            |       | 4.44           |

ARO\_R\_SCORE = Number of aromatic rings; HA\_SCORE = Number of heavy atoms.

MWHNM\_SCORE =  $[-0.5MW(HBA+HBD)]$  where MW = molecular weight, HBA = number of hydrogen bond acceptor sites, and HBD = number of hydrogen bond donors;

TPSA = topological polar surface area; PKA\_SCORE = Acidity strength. Gupta, M.;

Lee, H. J.; Barden, C. J.; Weaver, D. "The Blood-Brain Barrier (BBB) Score" J. Med.

Chem. 2019, 62 (21), 9824-9836.

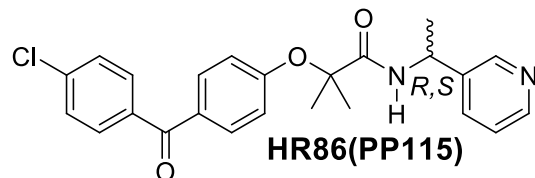

| Calc. | MarvinSketch | IP   | RB | HLB  | logS  | PL    | MPA   | MSA    | HBA | MR     | hERG <sub>AM</sub> | hERG <sub>CM</sub> |
|-------|--------------|------|----|------|-------|-------|-------|--------|-----|--------|--------------------|--------------------|
|       | T0           | 8.67 | 7  | 5.01 | -6.05 | 45.67 | 57.16 | 604.58 | 7   | 116.79 | 5.39               | safe               |
| ClogP | 4.70         | 0.15 |    |      |       |       |       |        |     |        |                    |                    |
| ClogD | 4.70         | 0.00 |    |      |       |       |       |        |     |        |                    |                    |
| MW    | 422.91       | 0.55 |    |      |       |       |       |        |     |        |                    |                    |
| PSA   | 68.29        | 1.00 |    |      |       |       |       |        |     |        |                    |                    |
| HBD   | 1.00         | 0.75 |    |      |       |       |       |        |     |        |                    |                    |
| pKa   | 4.80         | 1.00 |    |      |       |       |       |        |     |        |                    |                    |
| MPO   | 3.45         |      |    |      |       |       |       |        |     |        |                    |                    |
| BBB   | 4.44         |      |    |      |       |       |       |        |     |        |                    |                    |
| LogBB | -0.16        |      |    |      |       |       |       |        |     |        |                    |                    |

IP = Isoelectric Point; RB = Number of rotatable bonds; HLB = hydrophilic-lipophilic

balance; logS = water solubility; PL = polarizability( $\text{\AA}^3$ ); Minimal Projection Area ( $\text{\AA}^2$ );

MSA = molecular surface area; HBA = hydrogen bond acceptors; MR = Molar

refractivity; ClogD = distribution at pKa; PSA = polar surface area; HBD = hydrogen

bond donors; pKa = estimated acid strength; MPO = score for CNS penetration; LogBB

= blood-brain distribution ( $0.152\text{ClogP} - 0.0148\text{PSA} + 0.138$ ); hERG = estimated pIC<sub>50</sub>

(pAct) value for hERG (the human ether-a-go-go (hERG) ion channel); hERG<sub>AM</sub> =

hERG activity model; hERG<sub>CM</sub> = hERG classification model

| BBB Score Calculator |       |                |
|----------------------|-------|----------------|
| Property             | Value | T <sub>0</sub> |
| ARO_R_SCORE          | 3     | 0.69           |
| HA_SCORE             | 30    | 0.75           |
| HWHBN_SCORE          | 0.24  | 0.97           |
| TPSA_SCORE           | 68.29 | 0.52           |
| PKA_SCORE            | 8.81  | 1.00           |
| BBB_SCORE            |       | 4.44           |

ARO\_R\_SCORE = Number of aromatic rings; HA\_SCORE = Number of heavy atoms.

MWHNM\_SCORE =  $[-0.5MW(HBA+HBD)]$  where MW = molecular weight, HBA = number of hydrogen bond acceptor sites, and HBD = number of hydrogen bond donors;

TPSA = topological polar surface area; PKA\_SCORE = Acidity strength. Gupta, M.;

Lee, H. J.; Barden, C. J.; Weaver, D. "The Blood-Brain Barrier (BBB) Score" J. Med.

Chem. 2019, 62 (21), 9824-9836.

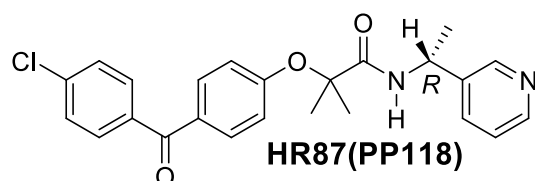

| Calc. | MarvinSketch | IP   | RB | HLB  | logS  | PL    | MPA   | MSA    | HBA | MR     | hERG <sub>AM</sub> | hERG <sub>CM</sub> |
|-------|--------------|------|----|------|-------|-------|-------|--------|-----|--------|--------------------|--------------------|
|       | T0           | 8.67 | 7  | 5.01 | -6.05 | 45.67 | 57.16 | 604.58 | 7   | 116.79 | 5.36               | safe               |
| ClogP | 4.70         | 0.15 |    |      |       |       |       |        |     |        |                    |                    |
| ClogD | 4.70         | 0.00 |    |      |       |       |       |        |     |        |                    |                    |
| MW    | 422.91       | 0.55 |    |      |       |       |       |        |     |        |                    |                    |
| PSA   | 68.29        | 1.00 |    |      |       |       |       |        |     |        |                    |                    |
| HBD   | 1.00         | 0.75 |    |      |       |       |       |        |     |        |                    |                    |
| pKa   | 4.79         | 1.00 |    |      |       |       |       |        |     |        |                    |                    |
| MPO   | 3.45         |      |    |      |       |       |       |        |     |        |                    |                    |
| BBB   | 3.40         |      |    |      |       |       |       |        |     |        |                    |                    |
| LogBB | -0.16        |      |    |      |       |       |       |        |     |        |                    |                    |

IP = Isoelectric Point; RB = Number of rotatable bonds; HLB = hydrophilic-lipophilic

balance; logS = water solubility; PL = polarizability( $\text{\AA}^3$ ); Minimal Projection Area ( $\text{\AA}^2$ );

MSA = molecular surface area; HBA = hydrogen bond acceptors; MR = Molar

refractivity; ClogD = distribution at pKa; PSA = polar surface area; HBD = hydrogen

bond donors; pKa = estimated acid strength; MPO = score for CNS penetration; LogBB

= blood-brain distribution ( $0.152\text{ClogP} - 0.0148\text{PSA} + 0.138$ ); hERG = estimated pIC50

(pAct) value for hERG (the human ether-a-go-go (hERG) ion channel); hERG<sub>AM</sub> = hERG activity model; hERG<sub>CM</sub> = hERG classification model

| BBB Score Calculator |       |                |
|----------------------|-------|----------------|
| Property             | Value | T <sub>0</sub> |
| ARO_R_SCORE          | 3     | 0.69           |
| HA_SCORE             | 30    | 0.75           |
| HWHBN_SCORE          | 0.24  | 0.97           |
| TPSA_SCORE           | 68.29 | 0.52           |
| PKA_SCORE            | 8.81  | 1.00           |
| BBB_SCORE            |       | 4.44           |

ARO\_R\_SCORE = Number of aromatic rings; HA\_SCORE = Number of heavy atoms.

MWHNM\_SCORE =  $[-0.5MW(HBA+HBD)]$  where MW = molecular weight, HBA = number of hydrogen bond acceptor sites, and HBD = number of hydrogen bond donors;

TPSA = topological polar surface area; PKA\_SCORE = Acidity strength. Gupta, M.;

Lee, H. J.; Barden, C. J.; Weaver, D. "The Blood-Brain Barrier (BBB) Score" J. Med.

Chem. 2019, 62 (21), 9824-9836.

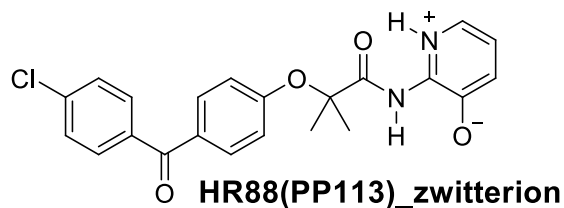

| Calc. | MarvinSketch | IP   | RB | HLB   | logS      | PL    | MPA   | MSA    | HBA | MR     | hERG <sub>AM</sub> | hERG <sub>CM</sub> |
|-------|--------------|------|----|-------|-----------|-------|-------|--------|-----|--------|--------------------|--------------------|
|       | T0           | NA   | 6  | 13.41 | -<br>5.75 | 42.37 | 45.59 | 554.75 | 9   | 122.36 | 5.17               | safe               |
| ClogP | 4.87         | 0.07 |    |       |           |       |       |        |     |        |                    |                    |
| ClogD | 4.63         | 0.00 |    |       |           |       |       |        |     |        |                    |                    |
| MW    | 410.85       | 0.64 |    |       |           |       |       |        |     |        |                    |                    |
| PSA   | 92.60        | 0.91 |    |       |           |       |       |        |     |        |                    |                    |
| HBD   | 2.00         | 0.50 |    |       |           |       |       |        |     |        |                    |                    |
| pKa   | 3.92         | 1.00 |    |       |           |       |       |        |     |        |                    |                    |
| MPO   | 3.12         |      |    |       |           |       |       |        |     |        |                    |                    |
| BBB   | 3.92         |      |    |       |           |       |       |        |     |        |                    |                    |
| LogBB | -0.49        |      |    |       |           |       |       |        |     |        |                    |                    |

IP = Isoelectric Point; RB = Number of rotatable bonds; HLB = hydrophilic-lipophilic balance; logS = water solubility; PL = polarizability(Å<sup>3</sup>); Minimal Projection Area (Å<sup>2</sup>); MSA = molecular surface area; HBA = hydrogen bond acceptors; MR = Molar refractivity; ClogD = distribution at pKa; PSA = polar surface area; HBD = hydrogen bond donors; pKa = estimated acid strength; MPO = score for CNS penetration; LogBB

= blood-brain distribution ( $0.152\text{ClogP} - 0.0148\text{PSA} + 0.138$ ); hERG = estimated pIC50 (pAct) value for hERG (the human ether-a-go-go (hERG) ion channel); hERG<sub>AM</sub> = hERG activity model; hERG<sub>CM</sub> = hERG classification model

| BBB Score Calculator |       |                |
|----------------------|-------|----------------|
| Property             | Value | T <sub>0</sub> |
| ARO_R_SCORE          | 3     | 0.69           |
| HA_SCORE             | 29    | 0.79           |
| HWHBN_SCORE          | 0.30  | 0.85           |
| TPSA_SCORE           | 92.60 | 0.35           |
| PKA_SCORE            | 7.52  | 0.90           |
| BBB_SCORE            |       | 3.92           |

ARO\_R\_SCORE = Number of aromatic rings; HA\_SCORE = Number of heavy atoms.

MWHNM\_SCORE =  $[-0.5\text{MW}(\text{HBA}+\text{HBD})]$  where MW = molecular weight, HBA = number of hydrogen bond acceptor sites, and HBD = number of hydrogen bond donors;

TPSA = topological polar surface area; PKA\_SCORE = Acidity strength. Gupta, M.;

Lee, H. J.; Barden, C. J.; Weaver, D. "The Blood-Brain Barrier (BBB) Score" J. Med.

Chem. 2019, 62 (21), 9824-9836.

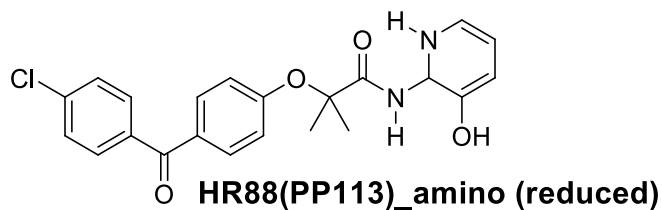

| Calc. | MarvinSketch | IP   | RB | HLB   | logS      | PL    | MPA   | MSA    | HBA | MR     | hERG <sub>AM</sub> | hERG <sub>CM</sub> |
|-------|--------------|------|----|-------|-----------|-------|-------|--------|-----|--------|--------------------|--------------------|
|       | T0           | 9.52 | 6  | 12.54 | -<br>5.97 | 42.86 | 47.06 | 540.14 | 9   | 112.46 | 5.52               | toxic              |
| ClogP | 3.72         | 0.64 |    |       |           |       |       |        |     |        |                    |                    |
| ClogD | 3.39         | 0.31 |    |       |           |       |       |        |     |        |                    |                    |
| MW    | 412.87       | 0.62 |    |       |           |       |       |        |     |        |                    |                    |
| PSA   | 87.66        | 1.00 |    |       |           |       |       |        |     |        |                    |                    |
| HBD   | 3.00         | 0.25 |    |       |           |       |       |        |     |        |                    |                    |
| pKa   | 4.84         | 1.00 |    |       |           |       |       |        |     |        |                    |                    |
| MPO   | 3.82         |      |    |       |           |       |       |        |     |        |                    |                    |
| BBB   | 3.75         |      |    |       |           |       |       |        |     |        |                    |                    |
| LogBB | -0.63        |      |    |       |           |       |       |        |     |        |                    |                    |

IP = Isoelectric Point; RB = Number of rotatable bonds; HLB = hydrophilic-lipophilic balance; logS = water solubility; PL = polarizability(Å<sup>3</sup>); Minimal Projection Area (Å<sup>2</sup>); MSA = molecular surface area; HBA = hydrogen bond acceptors; MR = Molar refractivity; ClogD = distribution at pKa; PSA = polar surface area; HBD = hydrogen bond donors; pKa = estimated acid strength; MPO = score for CNS penetration; LogBB

= blood-brain distribution ( $0.152\text{ClogP} - 0.0148\text{PSA} + 0.138$ ); hERG = estimated pIC50 (pAct) value for hERG (the human ether-a-go-go (hERG) ion channel); hERG<sub>AM</sub> = hERG activity model; hERG<sub>CM</sub> = hERG classification model

| BBB Score Calculator |       |                |
|----------------------|-------|----------------|
| Property             | Value | T <sub>0</sub> |
| ARO_R_SCORE          | 2     | 1.00           |
| HA_SCORE             | 29    | 0.79           |
| HWHBN_SCORE          | 0.39  | 0.50           |
| TPSA_SCORE           | 87.66 | 0.39           |
| PKA_SCORE            | 7.35  | 0.88           |
| BBB_SCORE            |       | 3.75           |

ARO\_R\_SCORE = Number of aromatic rings; HA\_SCORE = Number of heavy atoms.

MWHNM\_SCORE =  $[-0.5\text{MW}(\text{HBA}+\text{HBD})]$  where MW = molecular weight, HBA = number of hydrogen bond acceptor sites, and HBD = number of hydrogen bond donors;

TPSA = topological polar surface area; PKA\_SCORE = Acidity strength. Gupta, M.;

Lee, H. J.; Barden, C. J.; Weaver, D. "The Blood-Brain Barrier (BBB) Score" J. Med.

Chem. 2019, 62 (21), 9824-9836.

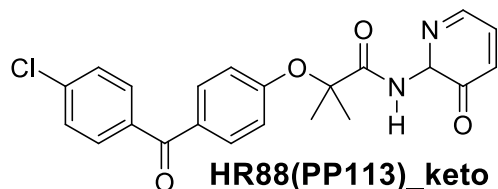

| Calc. | MarvinSketch | IP   | RB | HLB  | logS  | PL    | MPA   | MSA    | HBA | MR     | hERG <sub>AM</sub> | hERG <sub>CM</sub> |
|-------|--------------|------|----|------|-------|-------|-------|--------|-----|--------|--------------------|--------------------|
|       | T0           | 6.47 | 6  | 5.97 | -7.20 | 42.15 | 54.68 | 535.28 | 9   | 110.48 | 5.33               | safe               |
| ClogP | 4.07         | 0.46 |    |      |       |       |       |        |     |        |                    |                    |
| ClogD | 4.07         | 0.00 |    |      |       |       |       |        |     |        |                    |                    |
| MW    | 410.85       | 0.64 |    |      |       |       |       |        |     |        |                    |                    |
| PSA   | 84.83        | 1.00 |    |      |       |       |       |        |     |        |                    |                    |
| HBD   | 1.00         | 0.75 |    |      |       |       |       |        |     |        |                    |                    |
| pKa   | 2.62         | 1.00 |    |      |       |       |       |        |     |        |                    |                    |
| MPO   | 3.85         |      |    |      |       |       |       |        |     |        |                    |                    |
| BBB   | 4.38         |      |    |      |       |       |       |        |     |        |                    |                    |
| LogBB | -0.50        |      |    |      |       |       |       |        |     |        |                    |                    |

IP = Isoelectric Point; RB = Number of rotatable bonds; HLB = hydrophilic-lipophilic balance; logS = water solubility; PL = polarizability(Å<sup>3</sup>); Minimal Projection Area (Å<sup>2</sup>); MSA = molecular surface area; HBA = hydrogen bond acceptors; MR = Molar refractivity; ClogD = distribution at pKa; PSA = polar surface area; HBD = hydrogen bond donors; pKa = estimated acid strength; MPO = score for CNS penetration; LogBB = blood-brain distribution (0.152ClogP – 0.0148PSA + 0.138); hERG = estimated pIC50

(pAct) value for hERG (the human ether-a-go-go (hERG) ion channel); hERG<sub>AM</sub> = hERG activity model; hERG<sub>CM</sub> = hERG classification model

| BBB Score Calculator |       |                |
|----------------------|-------|----------------|
| Property             | Value | T <sub>0</sub> |
| ARO_R_SCORE          | 2     | 1.00           |
| HA_SCORE             | 29    | 0.79           |
| HWHBN_SCORE          | 0.30  | 0.85           |
| TPSA_SCORE           | 84.83 | 0.41           |
| PKA_SCORE            | 8.81  | 1.00           |
| BBB_SCORE            |       | 3.75           |

ARO\_R\_SCORE = Number of aromatic rings; HA\_SCORE = Number of heavy atoms.

MWHNM\_SCORE =  $[-0.5MW(HBA+HBD)]$  where MW = molecular weight, HBA = number of hydrogen bond acceptor sites, and HBD = number of hydrogen bond donors;

TPSA = topological polar surface area; PKA\_SCORE = Acidity strength. Gupta, M.;

Lee, H. J.; Barden, C. J.; Weaver, D. "The Blood-Brain Barrier (BBB) Score" J. Med.

Chem. 2019, 62 (21), 9824-9836.

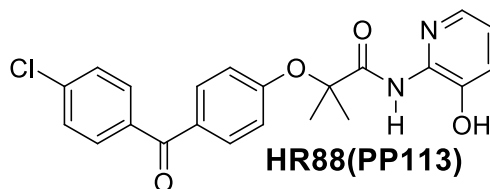

| Calc. | MarvinSketch |      | IP   | RB | HLB  | logS      | PL    | MPA   | MSA    | HBA | MR     | hERG <sub>AM</sub> | hERG <sub>CM</sub> |
|-------|--------------|------|------|----|------|-----------|-------|-------|--------|-----|--------|--------------------|--------------------|
|       |              | T0   | 6.16 | 6  | 5.62 | -<br>5.90 | 42.40 | 45.14 | 553.00 | 9   | 111.61 | 5.22               | safe               |
| ClogP | 4.87         | 0.07 |      |    |      |           |       |       |        |     |        |                    |                    |
| ClogD | 4.63         | 0.00 |      |    |      |           |       |       |        |     |        |                    |                    |
| MW    | 410.85       | 0.64 |      |    |      |           |       |       |        |     |        |                    |                    |
| PSA   | 88.52        | 1.00 |      |    |      |           |       |       |        |     |        |                    |                    |
| HBD   | 2.00         | 0.50 |      |    |      |           |       |       |        |     |        |                    |                    |
| pKa   | 3.92         | 1.00 |      |    |      |           |       |       |        |     |        |                    |                    |
| MPO   | 3.20         |      |      |    |      |           |       |       |        |     |        |                    |                    |
| BBB   | 3.72         |      |      |    |      |           |       |       |        |     |        |                    |                    |
| LogBB | -0.43        |      |      |    |      |           |       |       |        |     |        |                    |                    |

IP = Isoelectric Point; RB = Number of rotatable bonds; HLB = hydrophilic-lipophilic balance; logS = water solubility; PL = polarizability(Å<sup>3</sup>); Minimal Projection Area (Å<sup>2</sup>); MSA = molecular surface area; HBA = hydrogen bond acceptors; MR = Molar refractivity; ClogD = distribution at pKa; PSA = polar surface area; HBD = hydrogen bond donors; pKa = estimated acid strength; MPO = score for CNS penetration; LogBB

= blood-brain distribution ( $0.152\text{ClogP} - 0.0148\text{PSA} + 0.138$ ); hERG = estimated pIC50 (pAct) value for hERG (the human ether-a-go-go (hERG) ion channel); hERG<sub>AM</sub> = hERG activity model; hERG<sub>CM</sub> = hERG classification model

| BBB Score Calculator |       |                |
|----------------------|-------|----------------|
| Property             | Value | T <sub>0</sub> |
| ARO_R_SCORE          | 3     | 0.69           |
| HA_SCORE             | 29    | 0.79           |
| HWHBN_SCORE          | 0.35  | 0.69           |
| TPSA_SCORE           | 84.52 | 0.38           |
| PKA_SCORE            | 7.52  | 0.90           |
| BBB_SCORE            |       | 3.72           |

ARO\_R\_SCORE = Number of aromatic rings; HA\_SCORE = Number of heavy atoms.

MWHNM\_SCORE =  $[-0.5\text{MW}(\text{HBA}+\text{HBD})]$  where MW = molecular weight, HBA = number of hydrogen bond acceptor sites, and HBD = number of hydrogen bond donors;

TPSA = topological polar surface area; PKA\_SCORE = Acidity strength. Gupta, M.;

Lee, H. J.; Barden, C. J.; Weaver, D. "The Blood-Brain Barrier (BBB) Score" J. Med.

Chem. 2019, 62 (21), 9824-9836.

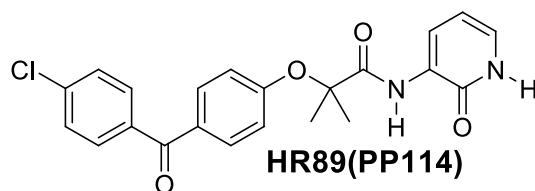

| Calc. | MarvinSketch |      | IP | RB | HLB  | logS      | PL    | MPA   | MSA    | HBA | MR     | hERG <sub>AM</sub> | hERG <sub>CM</sub> |
|-------|--------------|------|----|----|------|-----------|-------|-------|--------|-----|--------|--------------------|--------------------|
|       |              | T0   | NA | 6  | 7.23 | -<br>6.49 | 42.32 | 43.44 | 529.29 | 8   | 111.66 | 5.13               | safe               |
| ClogP | 3.53         | 0.73 |    |    |      |           |       |       |        |     |        |                    |                    |
| ClogD | 3.53         | 0.24 |    |    |      |           |       |       |        |     |        |                    |                    |
| MW    | 410.85       | 0.64 |    |    |      |           |       |       |        |     |        |                    |                    |
| PSA   | 84.50        | 1.00 |    |    |      |           |       |       |        |     |        |                    |                    |
| HBD   | 2.00         | 0.50 |    |    |      |           |       |       |        |     |        |                    |                    |
| pKa   | 1.82         | 1.00 |    |    |      |           |       |       |        |     |        |                    |                    |
| MPO   | 4.11         |      |    |    |      |           |       |       |        |     |        |                    |                    |
| BBB   | 4.08         |      |    |    |      |           |       |       |        |     |        |                    |                    |
| LogBB | -0.57        |      |    |    |      |           |       |       |        |     |        |                    |                    |

IP = Isoelectric Point; RB = Number of rotatable bonds; HLB = hydrophilic-lipophilic balance; logS = water solubility; PL = polarizability( $\text{\AA}^3$ ); Minimal Projection Area ( $\text{\AA}^2$ ); MSA = molecular surface area; HBA = hydrogen bond acceptors; MR = Molar refractivity; ClogD = distribution at pKa; PSA = polar surface area; HBD = hydrogen bond donors; pKa = estimated acid strength; MPO = score for CNS penetration; LogBB

= blood-brain distribution ( $0.152\text{ClogP} - 0.0148\text{PSA} + 0.138$ ); hERG = estimated pIC50 (pAct) value for hERG (the human ether-a-go-go (hERG) ion channel); hERG<sub>AM</sub> = hERG activity model; hERG<sub>CM</sub> = hERG classification model

| BBB Score Calculator |       |                |
|----------------------|-------|----------------|
| Property             | Value | T <sub>0</sub> |
| ARO_R_SCORE          | 3     | 0.69           |
| HA_SCORE             | 29    | 0.79           |
| HWHBN_SCORE          | 0.30  | 0.85           |
| TPSA_SCORE           | 84.50 | 0.41           |
| PKA_SCORE            | 8.81  | 1.00           |
| BBB_SCORE            | 4.08  |                |

ARO\_R\_SCORE = Number of aromatic rings; HA\_SCORE = Number of heavy atoms.

MWHNM\_SCORE =  $[-0.5\text{MW}(\text{HBA}+\text{HBD})]$  where MW = molecular weight, HBA = number of hydrogen bond acceptor sites, and HBD = number of hydrogen bond donors;

TPSA = topological polar surface area; PKA\_SCORE = Acidity strength. Gupta, M.;

Lee, H. J.; Barden, C. J.; Weaver, D. "The Blood-Brain Barrier (BBB) Score" J. Med.

Chem. 2019, 62 (21), 9824-9836.

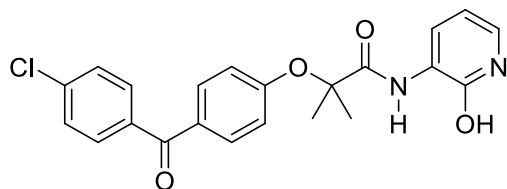

**HR89(PP114)\_aromatic**

| Calc. | MarvinSketch | IP   | RB | HLB  | logS  | PL    | MPA   | MSA    | HBA | MR     | hERG <sub>AM</sub> | hERG <sub>CM</sub> |
|-------|--------------|------|----|------|-------|-------|-------|--------|-----|--------|--------------------|--------------------|
|       | T0           | 6.17 | 6  | 5.85 | -6.00 | 42.40 | 43.69 | 552.22 | 9   | 111.61 | 5.21               | Safe               |
| ClogP | 4.87         | 0.07 |    |      |       |       |       |        |     |        |                    |                    |
| ClogD | 4.87         | 0.00 |    |      |       |       |       |        |     |        |                    |                    |
| MW    | 410.85       | 0.64 |    |      |       |       |       |        |     |        |                    |                    |
| PSA   | 88.52        | 1.00 |    |      |       |       |       |        |     |        |                    |                    |
| HBD   | 2.00         | 0.50 |    |      |       |       |       |        |     |        |                    |                    |
| pKa   | 1.82         | 1.00 |    |      |       |       |       |        |     |        |                    |                    |
| MPO   | 3.20         |      |    |      |       |       |       |        |     |        |                    |                    |
| BBB   | 3.77         |      |    |      |       |       |       |        |     |        |                    |                    |
| LogBB | -0.43        |      |    |      |       |       |       |        |     |        |                    |                    |

IP = Isoelectric Point; RB = Number of rotatable bonds; HLB = hydrophilic-lipophilic balance; logS = water solubility; PL = polarizability( $\text{\AA}^3$ ); Minimal Projection Area ( $\text{\AA}^2$ ); MSA = molecular surface area; HBA = hydrogen bond acceptors; MR = Molar refractivity; ClogD = distribution at pKa; PSA = polar surface area; HBD = hydrogen bond donors; pKa = estimated acid strength; MPO = score for CNS penetration; LogBB = blood-brain distribution ( $0.152\text{ClogP} - 0.0148\text{PSA} + 0.138$ ); hERG = estimated pIC50

(pAct) value for hERG (the human ether-a-go-go (hERG) ion channel); hERG<sub>AM</sub> = hERG activity model; hERG<sub>CM</sub> = hERG classification model

| BBB Score Calculator |       |                |
|----------------------|-------|----------------|
| Property             | Value | T <sub>0</sub> |
| ARO_R_SCORE          | 3     | 0.69           |
| HA_SCORE             | 29    | 0.79           |
| HWHBN_SCORE          | 0.35  | 0.69           |
| TPSA_SCORE           | 88.52 | 0.38           |
| PKA_SCORE            | 8.81  | 1.00           |
| BBB_SCORE            |       | 3.77           |

ARO\_R\_SCORE = Number of aromatic rings; HA\_SCORE = Number of heavy atoms.

MWHNM\_SCORE =  $[-0.5MW(HBA+HBD)]$  where MW = molecular weight, HBA = number of hydrogen bond acceptor sites, and HBD = number of hydrogen bond donors;

TPSA = topological polar surface area; PKA\_SCORE = Acidity strength. Gupta, M.;

Lee, H. J.; Barden, C. J.; Weaver, D. "The Blood-Brain Barrier (BBB) Score" J. Med.

Chem. 2019, 62 (21), 9824-9836.

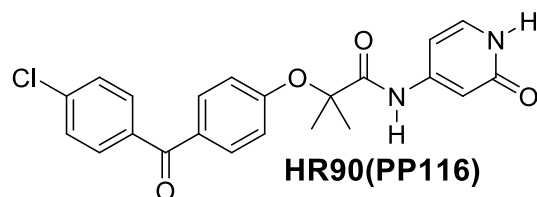

| Calc. | MarvinSketch |      | IP | RB | HLB  | logS      | PL    | MPA   | MSA    | HBA | MR     | hERG <sub>AM</sub> | hERG <sub>CM</sub> |
|-------|--------------|------|----|----|------|-----------|-------|-------|--------|-----|--------|--------------------|--------------------|
|       |              | T0   | NA | 6  | 7.23 | -<br>6.49 | 42.32 | 42.75 | 530.46 | 8   | 111.59 | 5.16               | safe               |
| ClogP | 3.38         | 0.81 |    |    |      |           |       |       |        |     |        |                    |                    |
| ClogD | 3.38         | 0.31 |    |    |      |           |       |       |        |     |        |                    |                    |
| MW    | 410.85       | 0.64 |    |    |      |           |       |       |        |     |        |                    |                    |
| PSA   | 84.50        | 1.00 |    |    |      |           |       |       |        |     |        |                    |                    |
| HBD   | 2.00         | 0.50 |    |    |      |           |       |       |        |     |        |                    |                    |
| pKa   | 1.80         | 1.00 |    |    |      |           |       |       |        |     |        |                    |                    |
| MPO   | 4.26         |      |    |    |      |           |       |       |        |     |        |                    |                    |
| BBB   | 4.08         |      |    |    |      |           |       |       |        |     |        |                    |                    |
| LogBB | -0.60        |      |    |    |      |           |       |       |        |     |        |                    |                    |

IP = Isoelectric Point; RB = Number of rotatable bonds; HLB = hydrophilic-lipophilic balance; logS = water solubility; PL = polarizability(Å<sup>3</sup>); Minimal Projection Area (Å<sup>2</sup>); MSA = molecular surface area; HBA = hydrogen bond acceptors; MR = Molar refractivity; ClogD = distribution at pKa; PSA = polar surface area; HBD = hydrogen bond donors; pKa = estimated acid strength; MPO = score for CNS penetration; LogBB

= blood-brain distribution ( $0.152\text{ClogP} - 0.0148\text{PSA} + 0.138$ ); hERG = estimated pIC50 (pAct) value for hERG (the human ether-a-go-go (hERG) ion channel); hERG<sub>AM</sub> = hERG activity model; hERG<sub>CM</sub> = hERG classification model

| BBB Score Calculator |       |                |
|----------------------|-------|----------------|
| Property             | Value | T <sub>0</sub> |
| ARO_R_SCORE          | 3     | 0.69           |
| HA_SCORE             | 29    | 0.79           |
| HWHBN_SCORE          | 0.30  | 0.85           |
| TPSA_SCORE           | 84.50 | 0.41           |
| PKA_SCORE            | 8.81  | 1.00           |
| BBB_SCORE            | 4.08  |                |

ARO\_R\_SCORE = Number of aromatic rings; HA\_SCORE = Number of heavy atoms.

MWHNM\_SCORE =  $[-0.5\text{MW}(\text{HBA}+\text{HBD})]$  where MW = molecular weight, HBA = number of hydrogen bond acceptor sites, and HBD = number of hydrogen bond donors;

TPSA = topological polar surface area; PKA\_SCORE = Acidity strength. Gupta, M.;

Lee, H. J.; Barden, C. J.; Weaver, D. "The Blood-Brain Barrier (BBB) Score" J. Med.

Chem. 2019, 62 (21), 9824-9836.

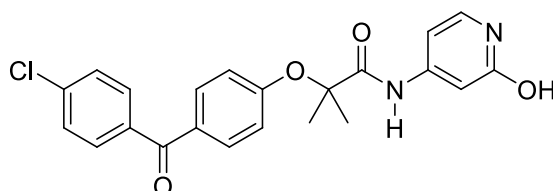

**HR90(PP116)\_aromatic**

| Calc. | MarvinSketch | IP   | RB | HLB  | logS  | PL    | MPA   | MSA    | HBA | MR     | hERG <sub>AM</sub> | hERG <sub>CM</sub> |
|-------|--------------|------|----|------|-------|-------|-------|--------|-----|--------|--------------------|--------------------|
|       | T0           | 6.92 | 6  | 5.85 | -6.00 | 42.40 | 44.16 | 554.21 | 9   | 111.61 | 5.21               | safe               |
| ClogP | 4.87         | 0.07 |    |      |       |       |       |        |     |        |                    |                    |
| ClogD | 4.87         | 0.00 |    |      |       |       |       |        |     |        |                    |                    |
| MW    | 410.85       | 0.64 |    |      |       |       |       |        |     |        |                    |                    |
| PSA   | 88.52        | 1.00 |    |      |       |       |       |        |     |        |                    |                    |
| HBD   | 2.00         | 0.5  |    |      |       |       |       |        |     |        |                    |                    |
| pKa   | 2.21         | 1.00 |    |      |       |       |       |        |     |        |                    |                    |
| MPO   | 3.20         |      |    |      |       |       |       |        |     |        |                    |                    |
| BBB   | 3.77         |      |    |      |       |       |       |        |     |        |                    |                    |
| LogBB | -0.43        |      |    |      |       |       |       |        |     |        |                    |                    |

IP = Isoelectric Point; RB = Number of rotatable bonds; HLB = hydrophilic-lipophilic balance; logS = water solubility; PL = polarizability( $\text{\AA}^3$ ); Minimal Projection Area ( $\text{\AA}^2$ ); MSA = molecular surface area; HBA = hydrogen bond acceptors; MR = Molar refractivity; ClogD = distribution at pKa; PSA = polar surface area; HBD = hydrogen bond donors; pKa = estimated acid strength; MPO = score for CNS penetration; LogBB

= blood-brain distribution ( $0.152\text{ClogP} - 0.0148\text{PSA} + 0.138$ ); hERG = estimated pIC50 (pAct) value for hERG (the human ether-a-go-go (hERG) ion channel); hERG<sub>AM</sub> = hERG activity model; hERG<sub>CM</sub> = hERG classification model

| BBB Score Calculator |       |                |
|----------------------|-------|----------------|
| Property             | Value | T <sub>0</sub> |
| ARO_R_SCORE          | 3     | 0.69           |
| HA_SCORE             | 29    | 0.79           |
| HWHBN_SCORE          | 0.35  | 0.69           |
| TPSA_SCORE           | 88.52 | 0.38           |
| PKA_SCORE            | 8.81  | 1.00           |
| BBB_SCORE            | 3.77  |                |

ARO\_R\_SCORE = Number of aromatic rings; HA\_SCORE = Number of heavy atoms.

MWHNM\_SCORE =  $[-0.5\text{MW}(\text{HBA}+\text{HBD})]$  where MW = molecular weight, HBA = number of hydrogen bond acceptor sites, and HBD = number of hydrogen bond donors;

TPSA = topological polar surface area; PKA\_SCORE = Acidity strength. Gupta, M.;

Lee, H. J.; Barden, C. J.; Weaver, D. "The Blood-Brain Barrier (BBB) Score" J. Med.

Chem. 2019, 62 (21), 9824-9836.

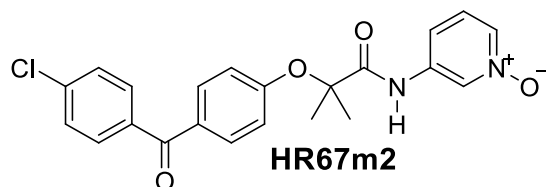

| Calc. | MarvinSketch |      | IP   | RB | HLB   | logS  | PL    | MPA   | MSA    | HBA | MR     | hERG <sub>AM</sub> | hERG <sub>CM</sub> |
|-------|--------------|------|------|----|-------|-------|-------|-------|--------|-----|--------|--------------------|--------------------|
|       |              | T0   | 6.13 | 6  | 11.51 | -6.13 | 42.26 | 43.33 | 558.19 | 9   | 112.63 | 5.36               | safe               |
| ClogP | 3.31         | 0.84 |      |    |       |       |       |       |        |     |        |                    |                    |
| ClogD | 3.31         | 0.84 |      |    |       |       |       |       |        |     |        |                    |                    |
| MW    | 410.85       | 0.64 |      |    |       |       |       |       |        |     |        |                    |                    |
| PSA   | 82.34        | 1.00 |      |    |       |       |       |       |        |     |        |                    |                    |
| HBD   | 1.00         | 0.75 |      |    |       |       |       |       |        |     |        |                    |                    |
| pKa   | 0.81         | 1.00 |      |    |       |       |       |       |        |     |        |                    |                    |
| MPO   | 4.57         |      |      |    |       |       |       |       |        |     |        |                    |                    |
| BBB   | 4.28         |      |      |    |       |       |       |       |        |     |        |                    |                    |
| LogBB |              |      |      |    |       |       |       |       |        |     |        |                    |                    |

IP = Isoelectric Point; RB = Number of rotatable bonds; HLB = hydrophilic-lipophilic

balance; logS = water solubility; PL = polarizability( $\text{\AA}^3$ ); Minimal Projection Area ( $\text{\AA}^2$ );

MSA = molecular surface area; HBA = hydrogen bond acceptors; MR = Molar

refractivity; ClogD = distribution at pKa; PSA = polar surface area; HBD = hydrogen

bond donors; pKa = estimated acid strength; MPO = score for CNS penetration; LogBB

= blood-brain distribution ( $0.152\text{ClogP} - 0.0148\text{PSA} + 0.138$ ); hERG = estimated pIC50

(pAct) value for hERG (the human ether-a-go-go (hERG) ion channel); hERG<sub>AM</sub> = hERG activity model; hERG<sub>CM</sub> = hERG classification model

| BBB Score Calculator |       |                |
|----------------------|-------|----------------|
| Property             | Value | T <sub>0</sub> |
| ARO_R_SCORE          | 3     | 0.69           |
| HA_SCORE             | 29    | 0.79           |
| HWHBN_SCORE          | 0.25  | 0.97           |
| TPSA_SCORE           | 82.34 | 0.43           |
| PKA_SCORE            | 8.81  | 1.00           |
| BBB_SCORE            |       | 4.28           |

ARO\_R\_SCORE = Number of aromatic rings; HA\_SCORE = Number of heavy atoms.

MWHNM\_SCORE =  $[-0.5MW(HBA+HBD)]$  where MW = molecular weight, HBA = number of hydrogen bond acceptor sites, and HBD = number of hydrogen bond donors;

TPSA = topological polar surface area; PKA\_SCORE = Acidity strength. Gupta, M.;

Lee, H. J.; Barden, C. J.; Weaver, D. "The Blood-Brain Barrier (BBB) Score" J. Med.

Chem. 2019, 62 (21), 9824-9836.

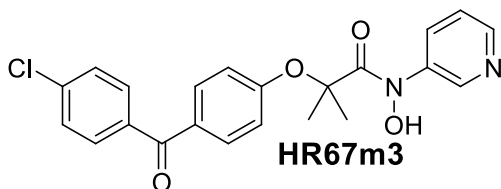

| Calc. | MarvinSketch | IP   | RB | HLB   | logS  | PL    | MPA   | MSA    | HBA | MR     | hERG <sub>AM</sub> | hERG <sub>CM</sub> |
|-------|--------------|------|----|-------|-------|-------|-------|--------|-----|--------|--------------------|--------------------|
|       | T0           | 5.82 | 6  | 11.77 | -5.06 | 42.41 | 51.70 | 556.21 | 9   | 109.30 | 5.63               | safe               |
| ClogP | 4.21         | 0.39 |    |       |       |       |       |        |     |        |                    |                    |
| ClogD | 4.06         | 0.00 |    |       |       |       |       |        |     |        |                    |                    |
| MW    | 410.85       | 0.64 |    |       |       |       |       |        |     |        |                    |                    |
| PSA   | 79.73        | 1.00 |    |       |       |       |       |        |     |        |                    |                    |
| HBD   | 1.00         | 0.75 |    |       |       |       |       |        |     |        |                    |                    |
| pKa   | 3.84         | 1.00 |    |       |       |       |       |        |     |        |                    |                    |
| MPO   | 3.78         |      |    |       |       |       |       |        |     |        |                    |                    |
| BBB   | 4.11         |      |    |       |       |       |       |        |     |        |                    |                    |
| LogBB |              |      |    |       |       |       |       |        |     |        |                    |                    |

IP = Isoelectric Point; RB = Number of rotatable bonds; HLB = hydrophilic-lipophilic balance; logS = water solubility; PL = polarizability( $\text{\AA}^3$ ); Minimal Projection Area ( $\text{\AA}^2$ ); MSA = molecular surface area; HBA = hydrogen bond acceptors; MR = Molar refractivity; ClogD = distribution at pKa; PSA = polar surface area; HBD = hydrogen bond donors; pKa = estimated acid strength; MPO = score for CNS penetration; LogBB = blood-brain distribution ( $0.152\text{ClogP} - 0.0148\text{PSA} + 0.138$ ); hERG = estimated pIC50 (pAct) value for hERG (the human ether-a-go-go (hERG) ion channel); hERG<sub>AM</sub> = hERG activity model; hERG<sub>CM</sub> = hERG classification model

| BBB Score Calculator |       |                |
|----------------------|-------|----------------|
| Property             | Value | T <sub>0</sub> |
| ARO_R_SCORE          | 3.00  | 0.69           |
| HA_SCORE             | 29.00 | 0.79           |
| HWHBN_SCORE          | 0.30  | 0.85           |
| TPSA_SCORE           | 79.73 | 0.44           |
| PKA_SCORE            | 7.79  | 0.94           |
| BBB_SCORE            |       | 4.11           |

ARO\_R\_SCORE = Number of aromatic rings; HA\_SCORE = Number of heavy atoms.

MWHNM\_SCORE =  $[-0.5MW(HBA+HBD)]$  where MW = molecular weight, HBA = number of hydrogen bond acceptor sites, and HBD = number of hydrogen bond donors;

TPSA = topological polar surface area; PKA\_SCORE = Acidity strength. Gupta, M.;

Lee, H. J.; Barden, C. J.; Weaver, D. "The Blood-Brain Barrier (BBB) Score" J. Med.

Chem. 2019, 62 (21), 9824-9836.

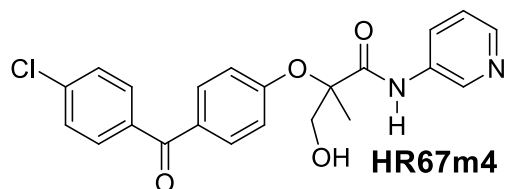

| Calc. | MarvinSketch | IP   | RB | HLB   | logS  | PL    | MPA   | MSA    | HBA | MR     | hERG <sub>AM</sub> | hERG <sub>CM</sub> |
|-------|--------------|------|----|-------|-------|-------|-------|--------|-----|--------|--------------------|--------------------|
|       | T0           | 8.35 | 7  | 12.06 | -5.44 | 42.41 | 40.63 | 553.24 | 9   | 110.86 | 5.40               | safe               |
| ClogP | 3.53         | 0.74 |    |       |       |       |       |        |     |        |                    |                    |
| ClogD | 3.53         | 0.24 |    |       |       |       |       |        |     |        |                    |                    |
| MW    | 410.85       | 0.64 |    |       |       |       |       |        |     |        |                    |                    |
| PSA   | 88.52        | 1.00 |    |       |       |       |       |        |     |        |                    |                    |
| HBD   | 2.00         | 0.50 |    |       |       |       |       |        |     |        |                    |                    |
| pKa   | 4.37         | 1.00 |    |       |       |       |       |        |     |        |                    |                    |
| MPO   | 4.11         |      |    |       |       |       |       |        |     |        |                    |                    |
| BBB   | 3.77         |      |    |       |       |       |       |        |     |        |                    |                    |
| LogBB |              |      |    |       |       |       |       |        |     |        |                    |                    |

IP = Isoelectric Point; RB = Number of rotatable bonds; HLB = hydrophilic-lipophilic

balance; logS = water solubility; PL = polarizability( $\text{\AA}^3$ ); Minimal Projection Area ( $\text{\AA}^2$ );

MSA = molecular surface area; HBA = hydrogen bond acceptors; MR = Molar

refractivity; ClogD = distribution at pKa; PSA = polar surface area; HBD = hydrogen

bond donors; pKa = estimated acid strength; MPO = score for CNS penetration; LogBB

= blood-brain distribution ( $0.152\text{ClogP} - 0.0148\text{PSA} + 0.138$ ); hERG = estimated pIC50

(pAct) value for hERG (the human ether-a-go-go (hERG) ion channel); hERG<sub>AM</sub> = hERG activity model; hERG<sub>CM</sub> = hERG classification model

| BBB Score Calculator |       |                |
|----------------------|-------|----------------|
| Property             | Value | T <sub>0</sub> |
| ARO_R_SCORE          | 3     | 0.69           |
| HA_SCORE             | 29.00 | 0.79           |
| HWHBN_SCORE          | 0.35  | 0.69           |
| TPSA_SCORE           | 88.52 | 0.38           |
| PKA_SCORE            | 8.81  | 1.00           |
| BBB_SCORE            |       | 3.77           |

ARO\_R\_SCORE = Number of aromatic rings; HA\_SCORE = Number of heavy atoms.

MWHNM\_SCORE =  $[-0.5MW(HBA+HBD)]$  where MW = molecular weight, HBA = number of hydrogen bond acceptor sites, and HBD = number of hydrogen bond donors;

TPSA = topological polar surface area; PKA\_SCORE = Acidity strength. Gupta, M.;

Lee, H. J.; Barden, C. J.; Weaver, D. "The Blood-Brain Barrier (BBB) Score" J. Med.

Chem. 2019, 62 (21), 9824-9836.

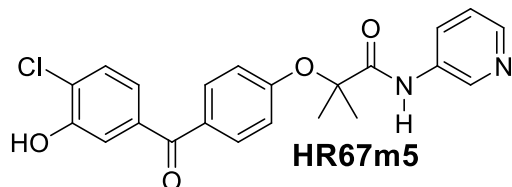

| Calc. | MarvinSketch | IP   | RB | HLB   | logS  | PL    | MPA   | MSA    | HBA | MR    | hERG <sub>AM</sub> | hERG <sub>CM</sub> |
|-------|--------------|------|----|-------|-------|-------|-------|--------|-----|-------|--------------------|--------------------|
|       | T0           | 6.10 | 6  | 12.02 | -5.44 | 42.42 | 40.55 | 552.87 | 9   | 11.29 | 5.76               | safe               |
| ClogP | 4.27         | 0.36 |    |       |       |       |       |        |     |       |                    |                    |
| ClogD | 4.14         | 0.00 |    |       |       |       |       |        |     |       |                    |                    |
| MW    | 410.85       | 0.64 |    |       |       |       |       |        |     |       |                    |                    |
| PSA   | 88.52        | 1.00 |    |       |       |       |       |        |     |       |                    |                    |
| HBD   | 2.00         | 0.50 |    |       |       |       |       |        |     |       |                    |                    |
| pKa   | 4.37         | 1.00 |    |       |       |       |       |        |     |       |                    |                    |
| MPO   | 3.50         |      |    |       |       |       |       |        |     |       |                    |                    |
| BBB   | 3.75         |      |    |       |       |       |       |        |     |       |                    |                    |
| LogBB |              |      |    |       |       |       |       |        |     |       |                    |                    |

IP = Isoelectric Point; RB = Number of rotatable bonds; HLB = hydrophilic-lipophilic balance; logS = water solubility; PL = polarizability( $\text{\AA}^3$ ); Minimal Projection Area ( $\text{\AA}^2$ ); MSA = molecular surface area; HBA = hydrogen bond acceptors; MR = Molar refractivity; ClogD = distribution at pKa; PSA = polar surface area; HBD = hydrogen bond donors; pKa = estimated acid strength; MPO = score for CNS penetration; LogBB = blood-brain distribution ( $0.152\text{ClogP} - 0.0148\text{PSA} + 0.138$ ); hERG = estimated pIC50 (pAct) value for hERG (the human ether-a-go-go (hERG) ion channel); hERG<sub>AM</sub> = hERG activity model; hERG<sub>CM</sub> = hERG classification model

| BBB Score Calculator |       |                |
|----------------------|-------|----------------|
| Property             | Value | T <sub>0</sub> |
| ARO_R_SCORE          | 3.00  | 0.69           |
| HA_SCORE             | 29.00 | 0.79           |
| HWHBN_SCORE          | 0.35  | 0.69           |
| TPSA_SCORE           | 88.52 | 0.38           |
| PKA_SCORE            | 7.85  | 0.95           |
| BBB_SCORE            |       | 3.75           |

ARO\_R\_SCORE = Number of aromatic rings; HA\_SCORE = Number of heavy atoms.

MWHNM\_SCORE =  $[-0.5MW(HBA+HBD)]$  where MW = molecular weight, HBA = number of hydrogen bond acceptor sites, and HBD = number of hydrogen bond donors;

TPSA = topological polar surface area; PKA\_SCORE = Acidity strength. Gupta, M.;

Lee, H. J.; Barden, C. J.; Weaver, D. "The Blood-Brain Barrier (BBB) Score" J. Med.

Chem. 2019, 62 (21), 9824-9836.

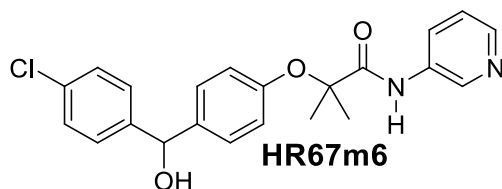

| Calc. | MarvinSketch |      | IP   | RB | HLB   | logS  | PL    | MPA   | MSA    | HBA | MR     | hERG <sub>AM</sub> | hERG <sub>CM</sub> |
|-------|--------------|------|------|----|-------|-------|-------|-------|--------|-----|--------|--------------------|--------------------|
|       |              | T0   | 8.37 | 6  | 11.34 | -4.95 | 42.17 | 53.36 | 554.15 | 7   | 109.84 | 5.49               | safe               |
| ClogP | 4.13         | 0.43 |      |    |       |       |       |       |        |     |        |                    |                    |
| ClogD | 4.13         | 0.00 |      |    |       |       |       |       |        |     |        |                    |                    |
| MW    | 396.87       | 0.74 |      |    |       |       |       |       |        |     |        |                    |                    |
| PSA   | 71.45        | 1.00 |      |    |       |       |       |       |        |     |        |                    |                    |
| HBD   | 2.00         | 0.50 |      |    |       |       |       |       |        |     |        |                    |                    |
| pKa   | 4.37         | 1.00 |      |    |       |       |       |       |        |     |        |                    |                    |
| MPO   | 3.67         |      |      |    |       |       |       |       |        |     |        |                    |                    |
| BBB   | 4.27         |      |      |    |       |       |       |       |        |     |        |                    |                    |
| LogBB |              |      |      |    |       |       |       |       |        |     |        |                    |                    |

IP = Isoelectric Point; RB = Number of rotatable bonds; HLB = hydrophilic-lipophilic balance; logS = water solubility; PL = polarizability(Å<sup>3</sup>); Minimal Projection Area (Å<sup>2</sup>); MSA = molecular surface area; HBA = hydrogen bond acceptors; MR = Molar refractivity; ClogD = distribution at pKa; PSA = polar surface area; HBD = hydrogen bond donors; pKa = estimated acid strength; MPO = score for CNS penetration; LogBB = blood-brain distribution (0.152ClogP – 0.0148PSA + 0.138); hERG = estimated pIC<sub>50</sub>

(pAct) value for hERG (the human ether-a-go-go (hERG) ion channel); hERG<sub>AM</sub> = hERG activity model; hERG<sub>CM</sub> = hERG classification model

| BBB Score Calculator |       |                |
|----------------------|-------|----------------|
| Property             | Value | T <sub>0</sub> |
| ARO_R_SCORE          | 3.00  | 0.69           |
| HA_SCORE             | 28.00 | 0.82           |
| HWHBN_SCORE          | 0.30  | 0.84           |
| TPSA_SCORE           | 71.45 | 0.50           |
| PKA_SCORE            | 8.81  | 1.00           |
| BBB_SCORE            |       | 4.27           |

ARO\_R\_SCORE = Number of aromatic rings; HA\_SCORE = Number of heavy atoms.

MWHNM\_SCORE =  $[-0.5MW(HBA+HBD)]$  where MW = molecular weight, HBA = number of hydrogen bond acceptor sites, and HBD = number of hydrogen bond donors;

TPSA = topological polar surface area; PKA\_SCORE = Acidity strength. Gupta, M.;

Lee, H. J.; Barden, C. J.; Weaver, D. "The Blood-Brain Barrier (BBB) Score" J. Med.

Chem. 2019, 62 (21), 9824-9836.

### 3. Density Functional Theory (DFT) with $\omega$ B97X-D/6-31G\* computed molecular properties.

DFT computed properties of aminopyridine derivatives **HR48**, **HR66**-**HR90**

| Structure                                                                                                    | EPM (solid)                                                                         | LUMO                                                                                | $E_{LUM}$<br>o | HOMO                                                                                 | $E_{LUM}$<br>o | $\Delta E_{FM}$<br>o | DM       |
|--------------------------------------------------------------------------------------------------------------|-------------------------------------------------------------------------------------|-------------------------------------------------------------------------------------|----------------|--------------------------------------------------------------------------------------|----------------|----------------------|----------|
| 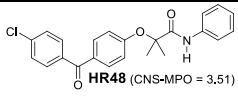<br>HR48 (CNS-MPO = 3,51)   |    |    | -0.20          |    | -7.98          | 7.68                 | 1.8<br>1 |
| <br>HR66 (CNS-MPO = 3,50)   |    |    | -0.18          |    | -8.37          | 8.19                 | 3.4<br>9 |
| <br>HR67 (CNS-MPO = 3,71)   |    |    | -0.26          |    | -8.33          | 8.07                 | 3.5<br>9 |
| <br>HR68 (CNS-MPO = 3,71) |  |  | -0.29          |  | -8.73          | 8.44                 | 2.8<br>9 |
| <br>HR69 (CNS-MPO = 3,93) |  |  | -0.07          |  | -8.44          | 8.37                 | 4.1<br>4 |
| <br>HR70 (CNS-MPO = 4,04) |  |  | -0.23          |  | -8.66          | 8.43                 | 1.2<br>7 |
| <br>HR71 (CNS-MPO = 3,41) |  |  | -0.14          |  | -8.60          | 8.46                 | 2.2<br>3 |
| <br>HR72 (CNS-MPO = 3,72) |  |  | -0.12          |  | -8.86          | 8.74                 | 1.6<br>1 |

|                                                                                                                     |                                                                                     |                                                                                     |       |                                                                                      |       |      |          |
|---------------------------------------------------------------------------------------------------------------------|-------------------------------------------------------------------------------------|-------------------------------------------------------------------------------------|-------|--------------------------------------------------------------------------------------|-------|------|----------|
| 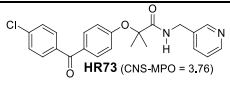<br><b>HR73</b> (CNS-MPO = 3,76)   |    |    | -0.17 |    | -8.87 | 8.70 | 4.1<br>7 |
| <br><b>HR74</b> (CNS-MPO = 3,76)   |    |    | -0.20 |    | -8.96 | 8.76 | 3.4<br>0 |
| <br><b>HR75</b> (CNS-MPO = 3,76)   |    |    | 0.04  |    | -8.37 | 8.41 | 3.5<br>7 |
| <br><b>HR76</b> (CNS-MPO = 3,80)   |    |    | -0.02 |    | -8.44 | 8.42 | 2.2<br>2 |
| <br><b>HR77</b> (CNS-MPO = 3,80)   |    |    | -0.03 |    | -8.45 | 8.42 | 0.3<br>9 |
| <br><b>HR78</b> (CNS-MPO = 3,50) |  |  | -0.13 |  | -8.73 | 8.60 | 2.3<br>9 |
| <br><b>HR79</b> (CNS-MPO = 3,52) |  |  | -0.19 |  | -8.79 | 8.60 | 3.7<br>8 |
| <br><b>HR80</b> (CNS-MPO = 3,52) |  |  | -0.21 |  | -8.97 | 8.76 | 2.7<br>3 |
| <br><b>HR81</b> (CNS-MPO = 3,00) |  |  | 0.25  |  | -8.01 | 8.26 | 7.5<br>0 |
| <br><b>HR82</b> (CNS-MPO = 2,78) |  |  | -0.24 |  | -7.35 | 7.11 | 2.1<br>4 |

|                                                                                                              |                                                                                     |                                                                                     |       |                                                                                      |       |      |          |
|--------------------------------------------------------------------------------------------------------------|-------------------------------------------------------------------------------------|-------------------------------------------------------------------------------------|-------|--------------------------------------------------------------------------------------|-------|------|----------|
| 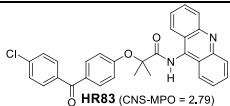<br>HR83 (CNS-MPO = 2,79)   |    |    | -0.39 |    | -7.50 | 7.11 | 2.4<br>8 |
| <br>HR84 (CNS-MPO = 3,33)   |    |    | -0.05 |    | -8.72 | 8.67 | 3.5<br>6 |
| <br>HR85 (CNS-MPO = 3,33)   |    |    | -0.04 |    | -8.72 | 8.68 | 3.8<br>7 |
| <br>HR86 (CNS-MPO = 3,45)   |    |    | -0.18 |    | -8.85 | 8.67 | 2.1<br>7 |
| <br>HR88 (CNS-MPO = 3,20)   |    |    | -0.04 |    | -7.93 | 7.89 | 3.7<br>5 |
| <br>HR89 (CNS-MPO = 4,10)  |   |   | -0.01 |   | -7.69 | 7.68 | 3.9<br>5 |
| <br>HR90 (CNS-MPO = 4,26) |  |  | -0.11 |  | -7.88 | 7.77 | 7.0<br>8 |

EPM = Electrostatic Potential Map; HOMO = Highest Occupied Molecular Orbital;

LUMO = Lowest Unoccupied Molecular Orbital;  $E_{\text{HOMO}}$  = Energy of HOMO in eV;  $E_{\text{LUMO}}$

= Energy of LUMO in eV;  $\Delta E_{\text{FMO}} = E_{\text{LUMO}} - E_{\text{HOMO}}$  in eV; DP = dipole moment (Debye)

DFT ( $\omega$ B97X-D/6-31G\*) computed properties (nucleophilicity) of few selected anilines and aminopyridines.

| Nucleophile     | Structure                                                                           | Electrostatic Potential                                                             | HOMO                                                                                | LUMO                                                                                 | HOMO (eV) | LUMO (eV) | Dipole Moment (debye) |
|-----------------|-------------------------------------------------------------------------------------|-------------------------------------------------------------------------------------|-------------------------------------------------------------------------------------|--------------------------------------------------------------------------------------|-----------|-----------|-----------------------|
| aniline         | 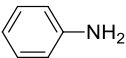   |    |    |    | -7.12     | 2.29      | 1.89                  |
| 4-aminophenol   |   |   |   |   | -6.96     | 2.03      | 2.14                  |
| 2-aminopyridine |  |  |  |  | -7.75     | 1.67      | 2.01                  |
| 3-aminopyridine |  |  |  |  | -7.78     | 1.56      | 3.26                  |
| 4-aminopyridine |  |  |  |  | -8.14     | 1.95      | 3.98                  |

HOMO = Highest Occupied Molecular Orbital; LUMO = Lowest Unoccupied Molecular Orbital

**4. Detection of our prototype drug candidate, PP1, in mouse tissues following intraperitoneal drug delivery.**

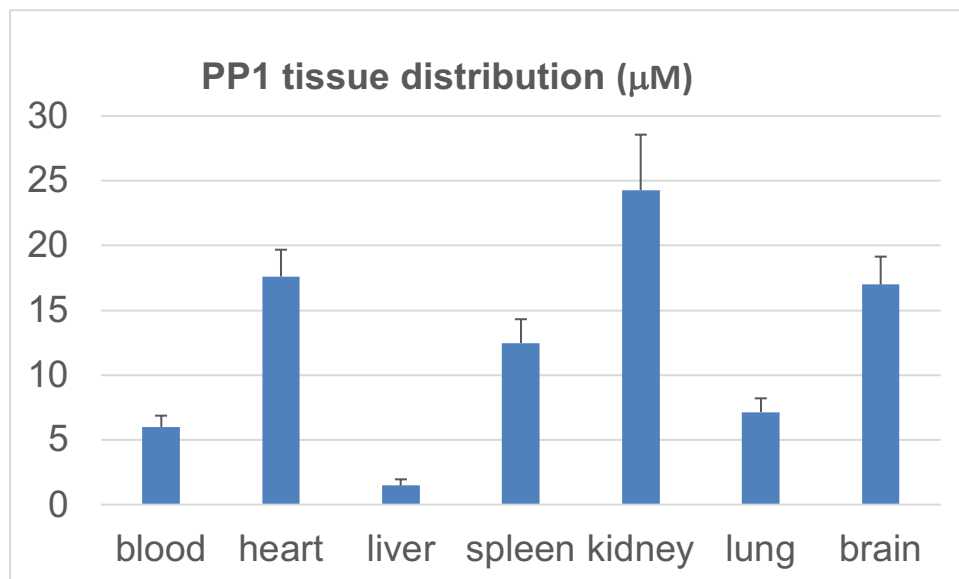

*Tissue distribution of our BPA-based prototype glioblastoma drug candidate, PP1. Mice were treated intraperitoneally (ip) with PP1 dissolved in 20% cyclodextrin at 50 mg/kg and the levels of the compound in blood, heart, liver, kidney, spleen, lung and brain were evaluated by HPLC (see methods). Data represent average values with standard deviation (n=3).*
